# Supplementary material
Source: MDPI journal article supplement (https://www.mdpi.com/2072-4292/9/10/1075)
Supplement: s1 [file s1]

Quick statistics

Survey 382695 'Classifying Singapore's Land Use and Land Cover'

Results

Survey 382695

|                                  |         |
|----------------------------------|---------|
| Number of records in this query: | 33      |
| Total records in survey:         | 33      |
| Percentage of total:             | 100.00% |

---

**Field summary for Q1**

---

. Do you give your consent to your responses being used in this research work ?

---

| Answer        | Count | Percentage |
|---------------|-------|------------|
| Yes (Y)       | 31    | 93.94%     |
| No (N)        | 1     | 3.03%      |
| No answer     | 1     | 3.03%      |
| Not displayed | 0     | 0.00%      |

## Field summary for Q1

. Do you give your consent to your responses being used in this research work ?

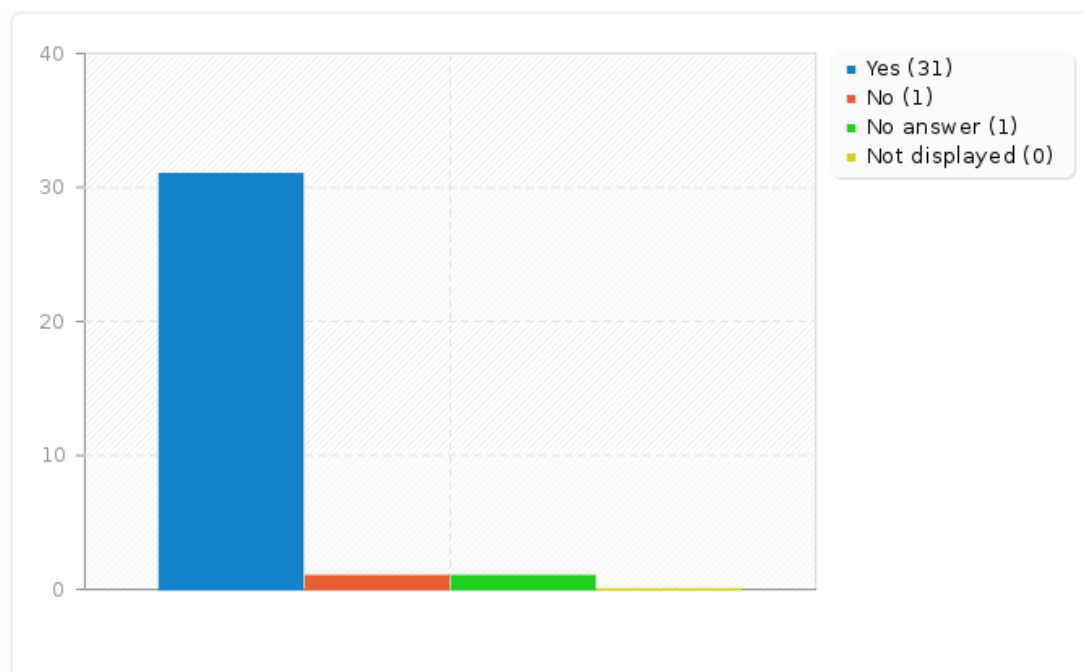

## Field summary for Q2

. What institute/organization are you affiliated to?

| Answer        | Count | Percentage |
|---------------|-------|------------|
| Answer        | 32    | 96.97%     |
| No answer     | 1     | 3.03%      |
| Not displayed | 0     | 0.00%      |

| ID  | Response                                             |
|-----|------------------------------------------------------|
| 5   | University of East Anglia                            |
| 15  | NUS                                                  |
| 21  | NUS                                                  |
| 22  | National University of Singapore                     |
| 25  | NUS                                                  |
| 28  | NUS                                                  |
| 29  | nus                                                  |
| 31  | NUS                                                  |
| 34  | National University of Singapore                     |
| 41  | NUS                                                  |
| 44  | Singapore Management University                      |
| 52  | National Parks Board                                 |
| 57  | National Parks Board                                 |
| 59  | NUS                                                  |
| 60  | NUS                                                  |
| 68  | Self-employed                                        |
| 72  | NUS                                                  |
| 73  | NUS libraries                                        |
| 78  | URA                                                  |
| 87  | Naina                                                |
| 96  | University of East Anglia                            |
| 98  | Nil                                                  |
| 99  | nus                                                  |
| 100 | National University of Singapore                     |
| 104 | Geography, NUS                                       |
| 105 | National University of Singapore, Dept. of Geography |
| 106 | National University of Singapore                     |
| 107 | nus geography                                        |
| 108 | Heerema Marine Contractors Singapore Pte. Ltd.       |
| 109 | NUS                                                  |
| 111 | National University of Singapore                     |
| 114 | NUS                                                  |

---

**Field summary for Q3**

---

. Have you ever used remote sensing (satellite) data or it's derived-datasets?

---

| Answer        | Count | Percentage |
|---------------|-------|------------|
| Yes (Y)       | 27    | 81.82%     |
| No (N)        | 5     | 15.15%     |
| No answer     | 1     | 3.03%      |
| Not displayed | 0     | 0.00%      |

## Field summary for Q3

. Have you ever used remote sensing (satellite) data or it's derived-datasets?

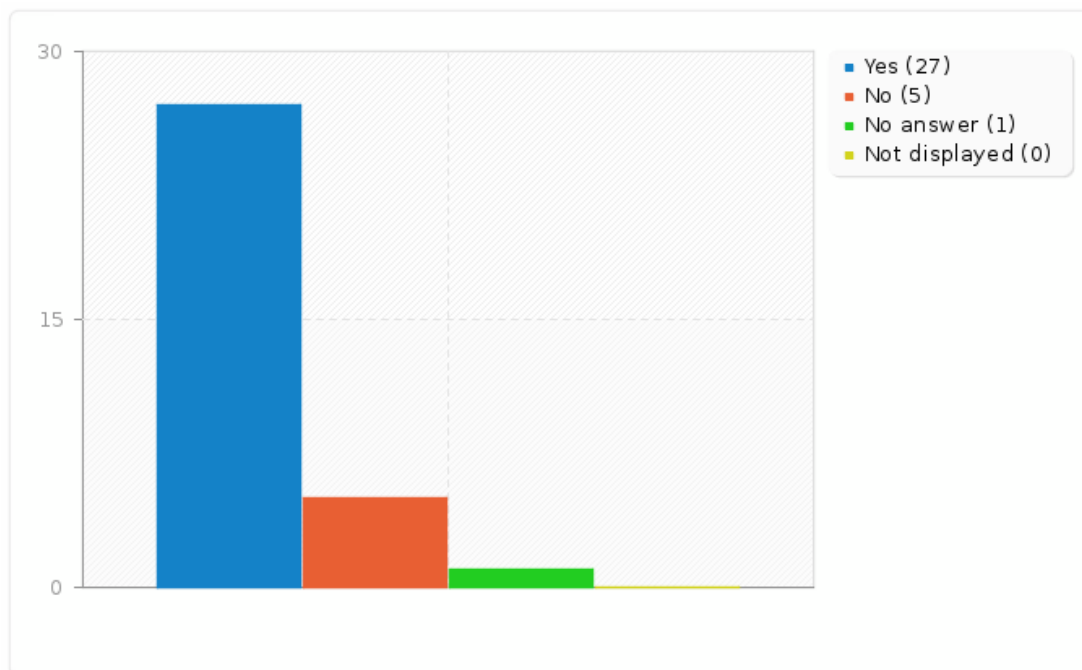

## Field summary for B1(SQ001)

[Point A]

| Answer                                  | Count | Percentage |
|-----------------------------------------|-------|------------|
| Water (A1)                              | 2     | 6.06%      |
| Evergreen Broadleaf Forest (A2)         | 0     | 0.00%      |
| Mixed Forest (A3)                       | 0     | 0.00%      |
| Cropland/Natural Vegetation Mosaic (A4) | 0     | 0.00%      |
| Permanent Wetland (A5)                  | 1     | 3.03%      |
| Urban/Built-up Area (A6)                | 29    | 87.88%     |
| Cropland (A7)                           | 0     | 0.00%      |
| Barren (A8)                             | 0     | 0.00%      |
| No answer                               | 1     | 3.03%      |
| Not displayed                           | 0     | 0.00%      |

Field summary for B1(SQ001)

[Point A]

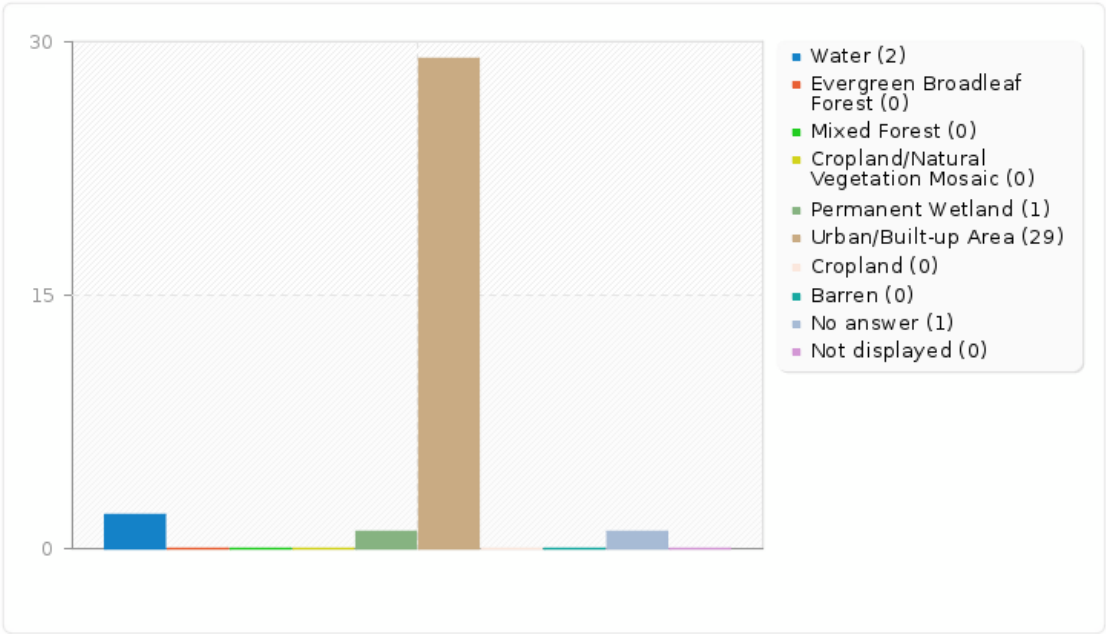



## Field summary for B1(SQ002)

[Point B]

| Answer                                  | Count | Percentage |
|-----------------------------------------|-------|------------|
| Water (A1)                              | 0     | 0.00%      |
| Evergreen Broadleaf Forest (A2)         | 0     | 0.00%      |
| Mixed Forest (A3)                       | 0     | 0.00%      |
| Cropland/Natural Vegetation Mosaic (A4) | 0     | 0.00%      |
| Permanent Wetland (A5)                  | 0     | 0.00%      |
| Urban/Built-up Area (A6)                | 30    | 90.91%     |
| Cropland (A7)                           | 1     | 3.03%      |
| Barren (A8)                             | 1     | 3.03%      |
| No answer                               | 1     | 3.03%      |
| Not displayed                           | 0     | 0.00%      |

Field summary for B1(SQ002)

[Point B]

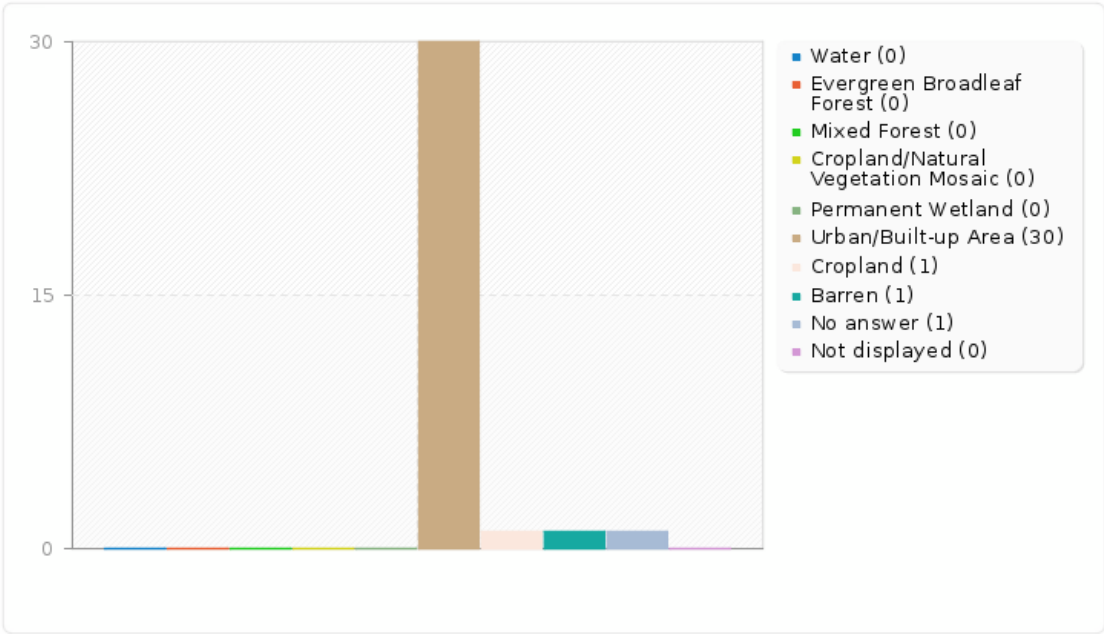

## Field summary for B1(SQ003)

[Point C]

| Answer                                  | Count | Percentage |
|-----------------------------------------|-------|------------|
| Water (A1)                              | 1     | 3.03%      |
| Evergreen Broadleaf Forest (A2)         | 0     | 0.00%      |
| Mixed Forest (A3)                       | 0     | 0.00%      |
| Cropland/Natural Vegetation Mosaic (A4) | 0     | 0.00%      |
| Permanent Wetland (A5)                  | 0     | 0.00%      |
| Urban/Built-up Area (A6)                | 4     | 12.12%     |
| Cropland (A7)                           | 1     | 3.03%      |
| Barren (A8)                             | 26    | 78.79%     |
| No answer                               | 1     | 3.03%      |
| Not displayed                           | 0     | 0.00%      |

Field summary for B1(SQ003)

[Point C]

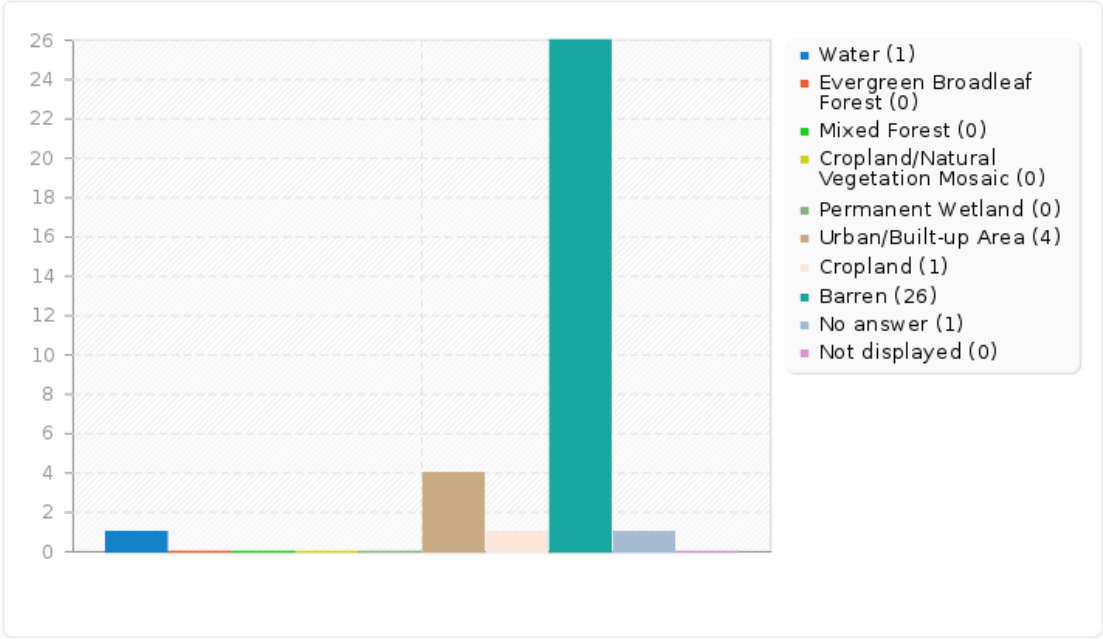

## Field summary for B2(SQ001)

[Point A]

| Answer                                  | Count | Percentage |
|-----------------------------------------|-------|------------|
| Water (A1)                              | 0     | 0.00%      |
| Evergreen Broadleaf Forest (A2)         | 0     | 0.00%      |
| Mixed Forest (A3)                       | 1     | 3.03%      |
| Cropland/Natural Vegetation Mosaic (A4) | 5     | 15.15%     |
| Permanent Wetland (A5)                  | 0     | 0.00%      |
| Urban/Built-up Area (A6)                | 1     | 3.03%      |
| Cropland (A7)                           | 1     | 3.03%      |
| Barren (A8)                             | 24    | 72.73%     |
| No answer                               | 1     | 3.03%      |
| Not displayed                           | 0     | 0.00%      |

## Field summary for B2(SQ001)

[Point A]

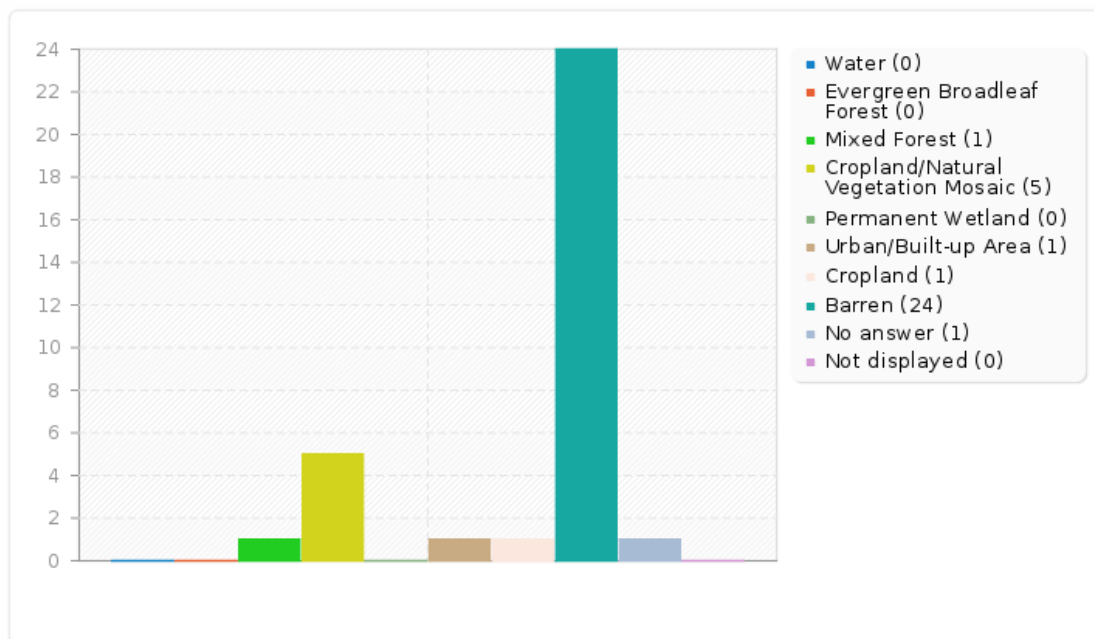

## Field summary for B2(SQ002)

[Point B]

| Answer                                  | Count | Percentage |
|-----------------------------------------|-------|------------|
| Water (A1)                              | 0     | 0.00%      |
| Evergreen Broadleaf Forest (A2)         | 0     | 0.00%      |
| Mixed Forest (A3)                       | 1     | 3.03%      |
| Cropland/Natural Vegetation Mosaic (A4) | 0     | 0.00%      |
| Permanent Wetland (A5)                  | 0     | 0.00%      |
| Urban/Built-up Area (A6)                | 31    | 93.94%     |
| Cropland (A7)                           | 0     | 0.00%      |
| Barren (A8)                             | 0     | 0.00%      |
| No answer                               | 1     | 3.03%      |
| Not displayed                           | 0     | 0.00%      |

Field summary for B2(SQ002)

[Point B]

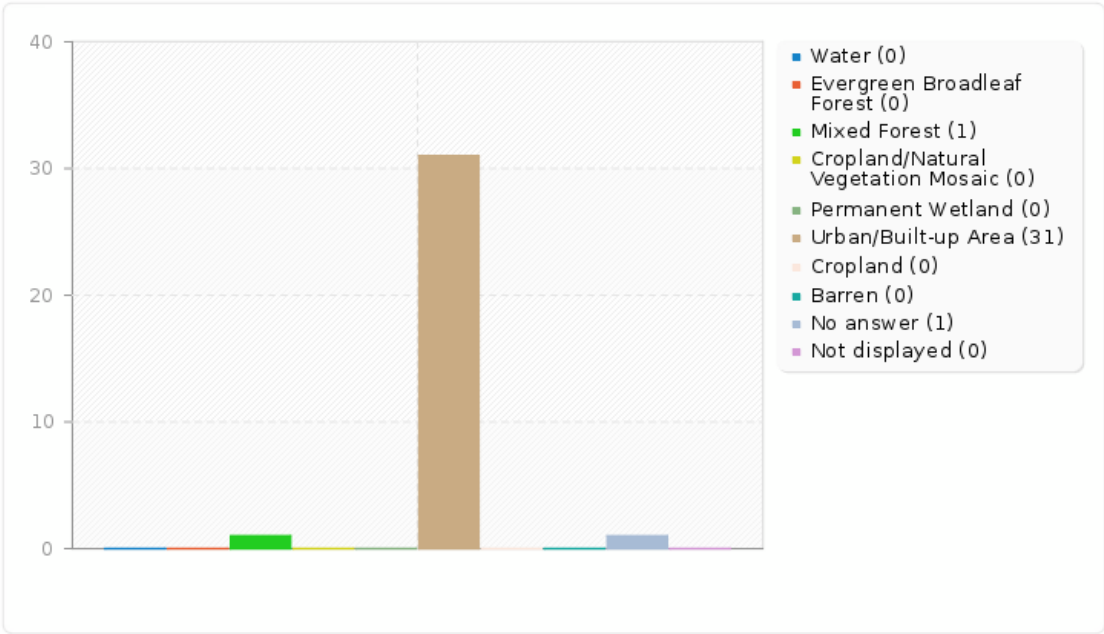



## Field summary for B2(SQ003)

[Point C]

| Answer                                  | Count | Percentage |
|-----------------------------------------|-------|------------|
| Water (A1)                              | 0     | 0.00%      |
| Evergreen Broadleaf Forest (A2)         | 0     | 0.00%      |
| Mixed Forest (A3)                       | 0     | 0.00%      |
| Cropland/Natural Vegetation Mosaic (A4) | 0     | 0.00%      |
| Permanent Wetland (A5)                  | 0     | 0.00%      |
| Urban/Built-up Area (A6)                | 32    | 96.97%     |
| Cropland (A7)                           | 0     | 0.00%      |
| Barren (A8)                             | 0     | 0.00%      |
| No answer                               | 1     | 3.03%      |
| Not displayed                           | 0     | 0.00%      |

Field summary for B2(SQ003)

[Point C]

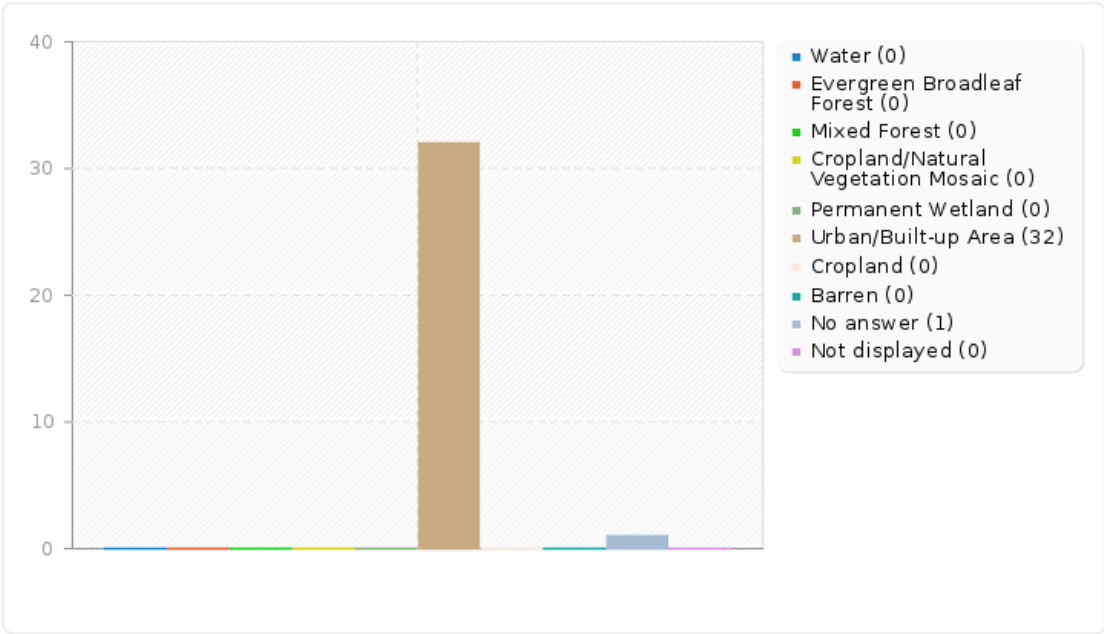

## Field summary for B3(SQ001)

[Point A]

| Answer                                  | Count | Percentage |
|-----------------------------------------|-------|------------|
| Water (A1)                              | 1     | 3.03%      |
| Evergreen Broadleaf Forest (A2)         | 2     | 6.06%      |
| Mixed Forest (A3)                       | 1     | 3.03%      |
| Cropland/Natural Vegetation Mosaic (A4) | 16    | 48.48%     |
| Permanent Wetland (A5)                  | 1     | 3.03%      |
| Urban/Built-up Area (A6)                | 0     | 0.00%      |
| Cropland (A7)                           | 8     | 24.24%     |
| Barren (A8)                             | 3     | 9.09%      |
| No answer                               | 1     | 3.03%      |
| Not displayed                           | 0     | 0.00%      |

Field summary for B3(SQ001)

[Point A]

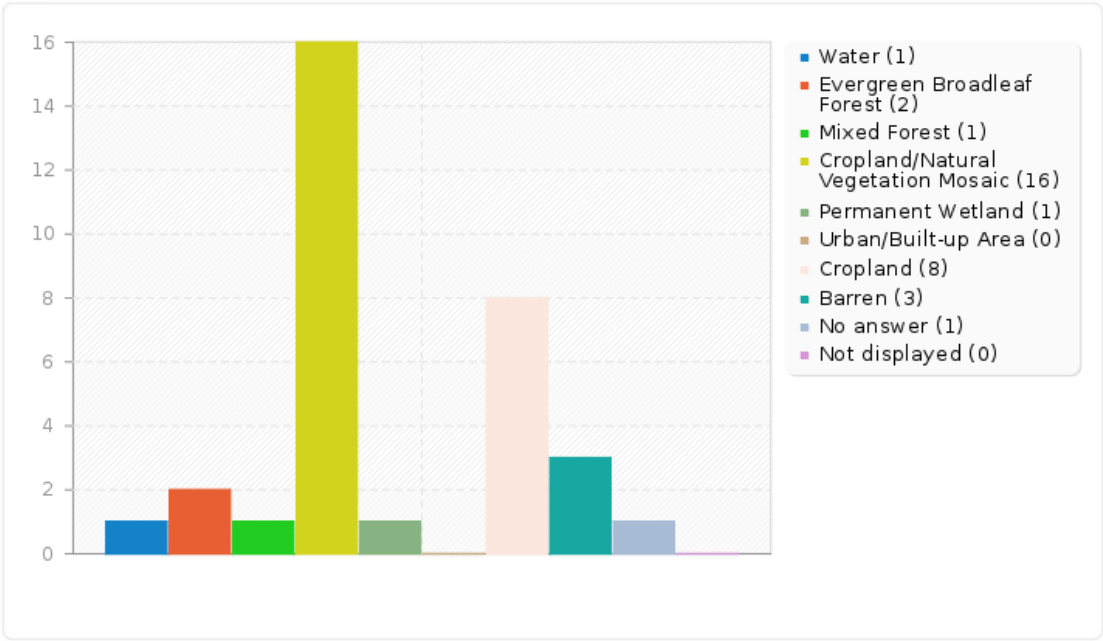

## Field summary for B3(SQ002)

[Point B]

| Answer                                  | Count | Percentage |
|-----------------------------------------|-------|------------|
| Water (A1)                              | 0     | 0.00%      |
| Evergreen Broadleaf Forest (A2)         | 0     | 0.00%      |
| Mixed Forest (A3)                       | 0     | 0.00%      |
| Cropland/Natural Vegetation Mosaic (A4) | 2     | 6.06%      |
| Permanent Wetland (A5)                  | 0     | 0.00%      |
| Urban/Built-up Area (A6)                | 1     | 3.03%      |
| Cropland (A7)                           | 1     | 3.03%      |
| Barren (A8)                             | 28    | 84.85%     |
| No answer                               | 1     | 3.03%      |
| Not displayed                           | 0     | 0.00%      |

Field summary for B3(SQ002)

[Point B]

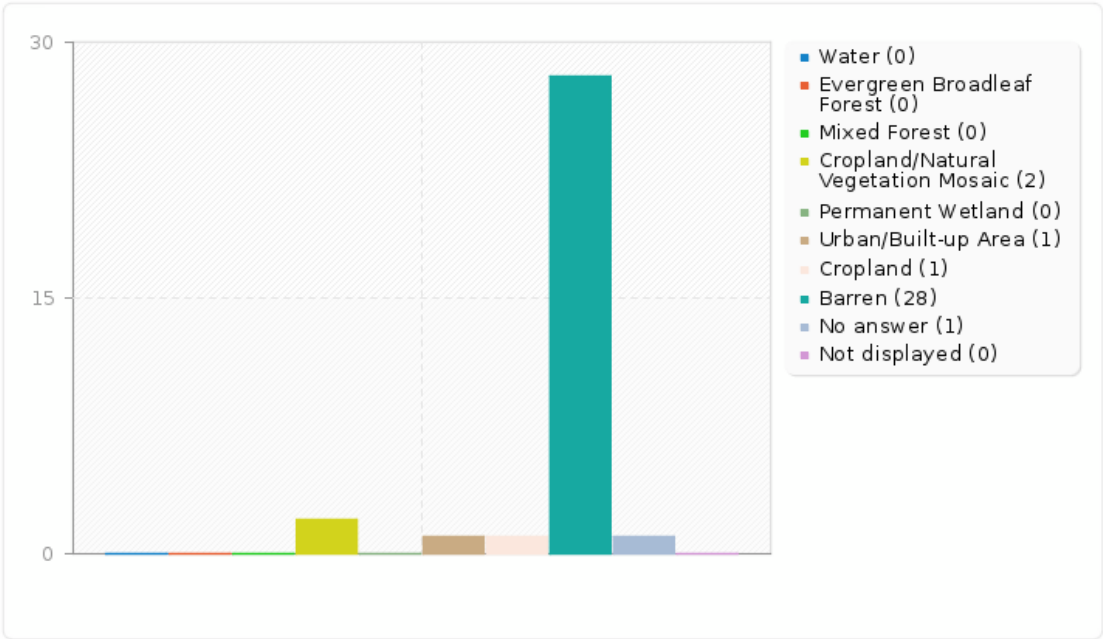

## Field summary for B4(SQ001)

[Point A]

| Answer                                  | Count | Percentage |
|-----------------------------------------|-------|------------|
| Water (A1)                              | 0     | 0.00%      |
| Evergreen Broadleaf Forest (A2)         | 3     | 9.09%      |
| Mixed Forest (A3)                       | 7     | 21.21%     |
| Cropland/Natural Vegetation Mosaic (A4) | 17    | 51.52%     |
| Permanent Wetland (A5)                  | 1     | 3.03%      |
| Urban/Built-up Area (A6)                | 1     | 3.03%      |
| Cropland (A7)                           | 1     | 3.03%      |
| Barren (A8)                             | 2     | 6.06%      |
| No answer                               | 1     | 3.03%      |
| Not displayed                           | 0     | 0.00%      |

Field summary for B4(SQ001)

[Point A]

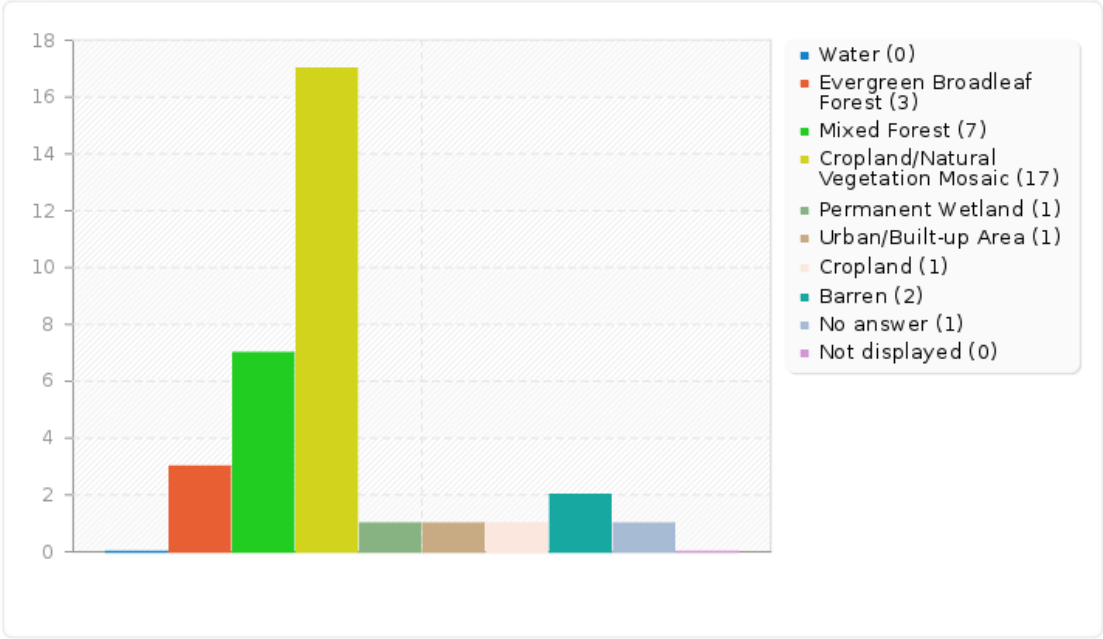



## Field summary for B4(SQ002)

[Point B]

| Answer                                  | Count | Percentage |
|-----------------------------------------|-------|------------|
| Water (A1)                              | 0     | 0.00%      |
| Evergreen Broadleaf Forest (A2)         | 0     | 0.00%      |
| Mixed Forest (A3)                       | 0     | 0.00%      |
| Cropland/Natural Vegetation Mosaic (A4) | 1     | 3.03%      |
| Permanent Wetland (A5)                  | 0     | 0.00%      |
| Urban/Built-up Area (A6)                | 28    | 84.85%     |
| Cropland (A7)                           | 2     | 6.06%      |
| Barren (A8)                             | 1     | 3.03%      |
| No answer                               | 1     | 3.03%      |
| Not displayed                           | 0     | 0.00%      |

Field summary for B4(SQ002)

[Point B]

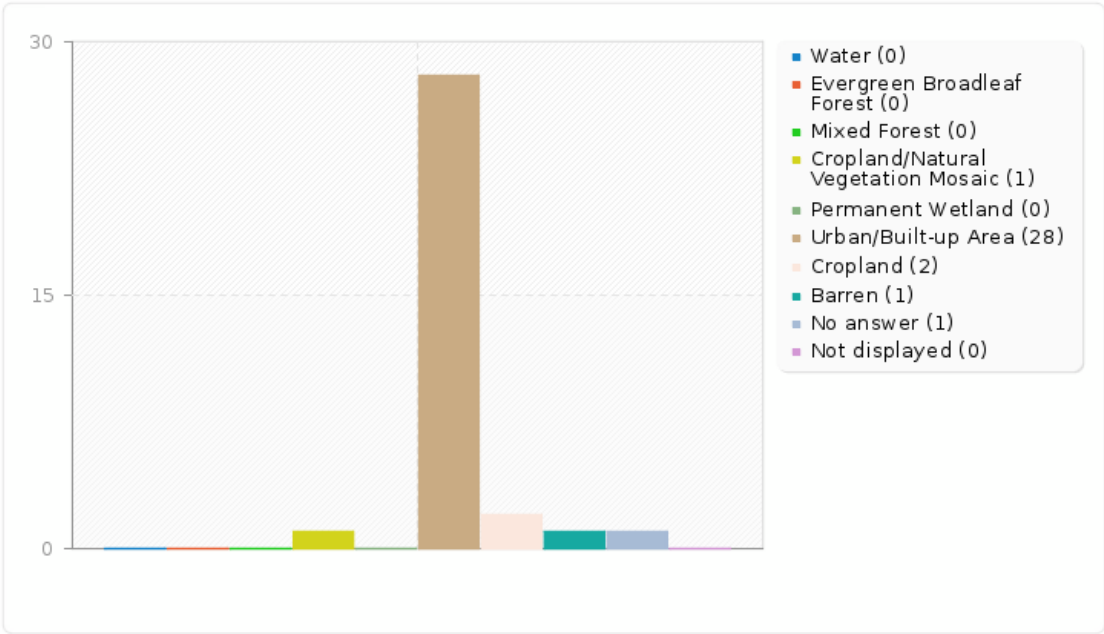

## Field summary for B4(SQ003)

[Point C]

| Answer                                  | Count | Percentage |
|-----------------------------------------|-------|------------|
| Water (A1)                              | 0     | 0.00%      |
| Evergreen Broadleaf Forest (A2)         | 0     | 0.00%      |
| Mixed Forest (A3)                       | 0     | 0.00%      |
| Cropland/Natural Vegetation Mosaic (A4) | 0     | 0.00%      |
| Permanent Wetland (A5)                  | 1     | 3.03%      |
| Urban/Built-up Area (A6)                | 31    | 93.94%     |
| Cropland (A7)                           | 0     | 0.00%      |
| Barren (A8)                             | 0     | 0.00%      |
| No answer                               | 1     | 3.03%      |
| Not displayed                           | 0     | 0.00%      |

Field summary for B4(SQ003)

[Point C]

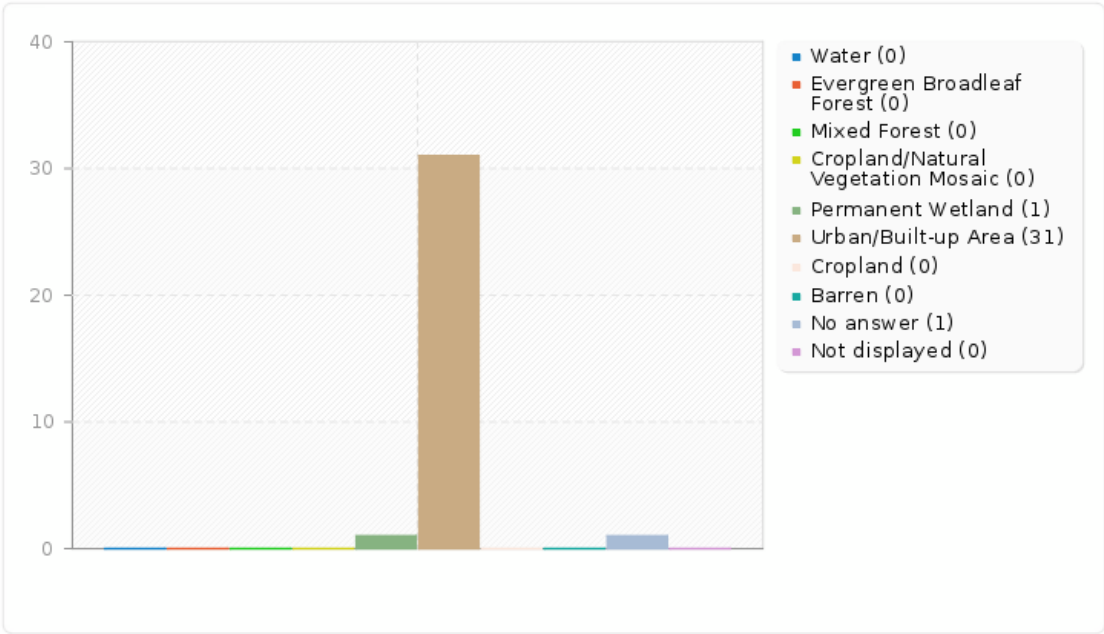

## Field summary for B6(SQ001)

[Point A]

| Answer                                  | Count | Percentage |
|-----------------------------------------|-------|------------|
| Water (A1)                              | 0     | 0.00%      |
| Evergreen Broadleaf Forest (A2)         | 19    | 57.58%     |
| Mixed Forest (A3)                       | 9     | 27.27%     |
| Cropland/Natural Vegetation Mosaic (A4) | 3     | 9.09%      |
| Permanent Wetland (A5)                  | 0     | 0.00%      |
| Urban/Built-up Area (A6)                | 0     | 0.00%      |
| Cropland (A7)                           | 1     | 3.03%      |
| Barren (A8)                             | 0     | 0.00%      |
| No answer                               | 1     | 3.03%      |
| Not displayed                           | 0     | 0.00%      |

Field summary for B6(SQ001)

[Point A]

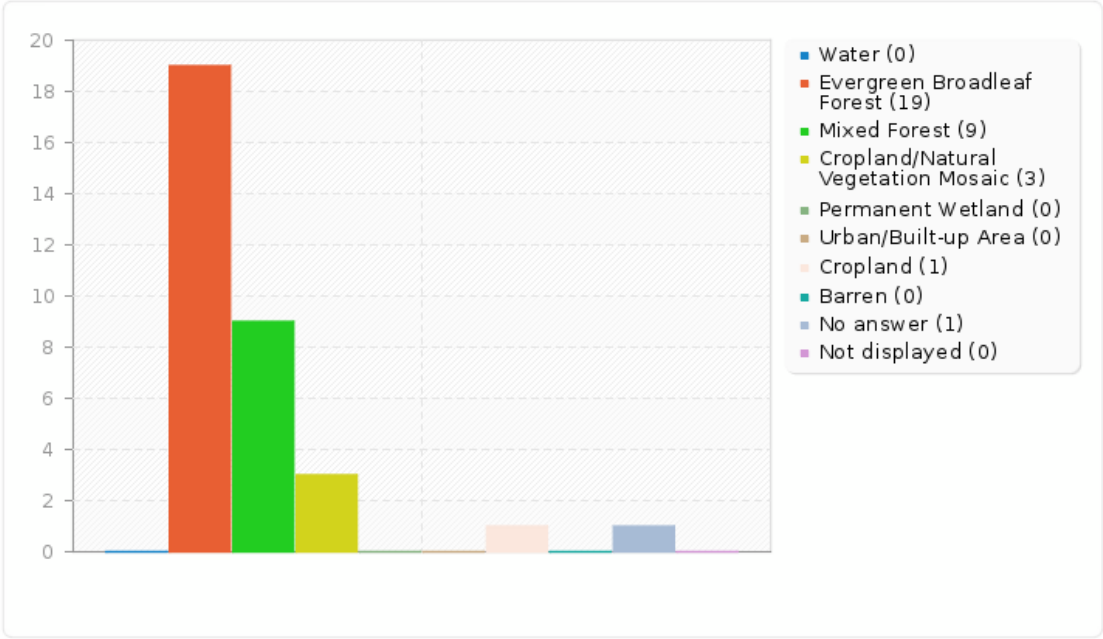

## Field summary for B6(SQ002)

[Point B]

| Answer                                  | Count | Percentage |
|-----------------------------------------|-------|------------|
| Water (A1)                              | 30    | 90.91%     |
| Evergreen Broadleaf Forest (A2)         | 0     | 0.00%      |
| Mixed Forest (A3)                       | 0     | 0.00%      |
| Cropland/Natural Vegetation Mosaic (A4) | 0     | 0.00%      |
| Permanent Wetland (A5)                  | 2     | 6.06%      |
| Urban/Built-up Area (A6)                | 0     | 0.00%      |
| Cropland (A7)                           | 0     | 0.00%      |
| Barren (A8)                             | 0     | 0.00%      |
| No answer                               | 1     | 3.03%      |
| Not displayed                           | 0     | 0.00%      |

Field summary for B6(SQ002)

[Point B]

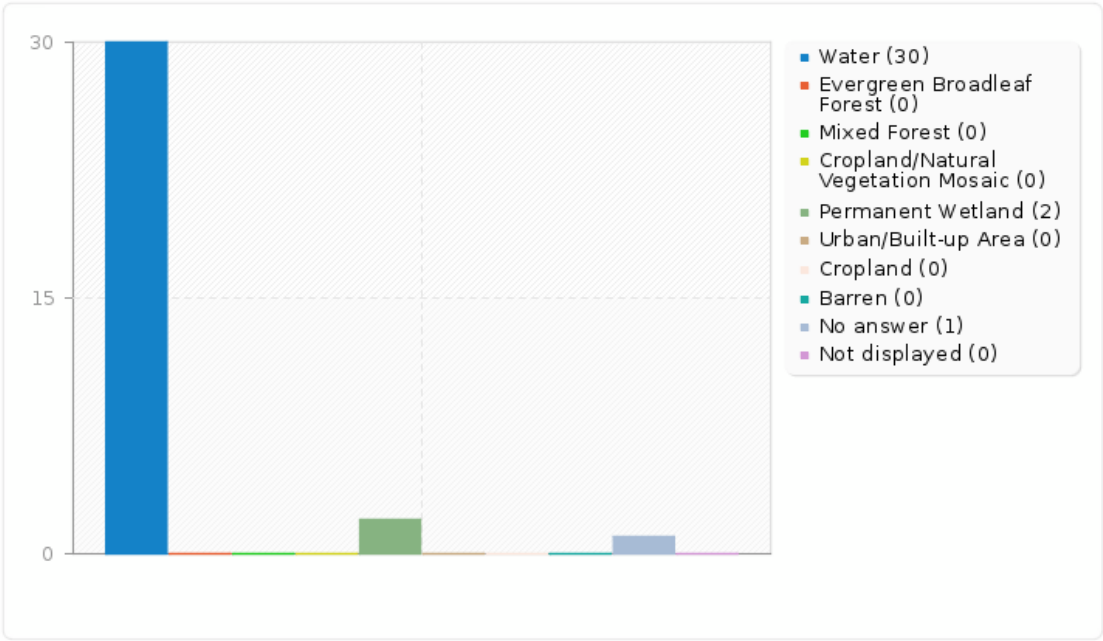



## Field summary for B7(SQ001)

[Point A]

| Answer                                  | Count | Percentage |
|-----------------------------------------|-------|------------|
| Water (A1)                              | 0     | 0.00%      |
| Evergreen Broadleaf Forest (A2)         | 0     | 0.00%      |
| Mixed Forest (A3)                       | 0     | 0.00%      |
| Cropland/Natural Vegetation Mosaic (A4) | 0     | 0.00%      |
| Permanent Wetland (A5)                  | 0     | 0.00%      |
| Urban/Built-up Area (A6)                | 31    | 93.94%     |
| Cropland (A7)                           | 0     | 0.00%      |
| Barren (A8)                             | 1     | 3.03%      |
| No answer                               | 1     | 3.03%      |
| Not displayed                           | 0     | 0.00%      |

Field summary for B7(SQ001)

[Point A]

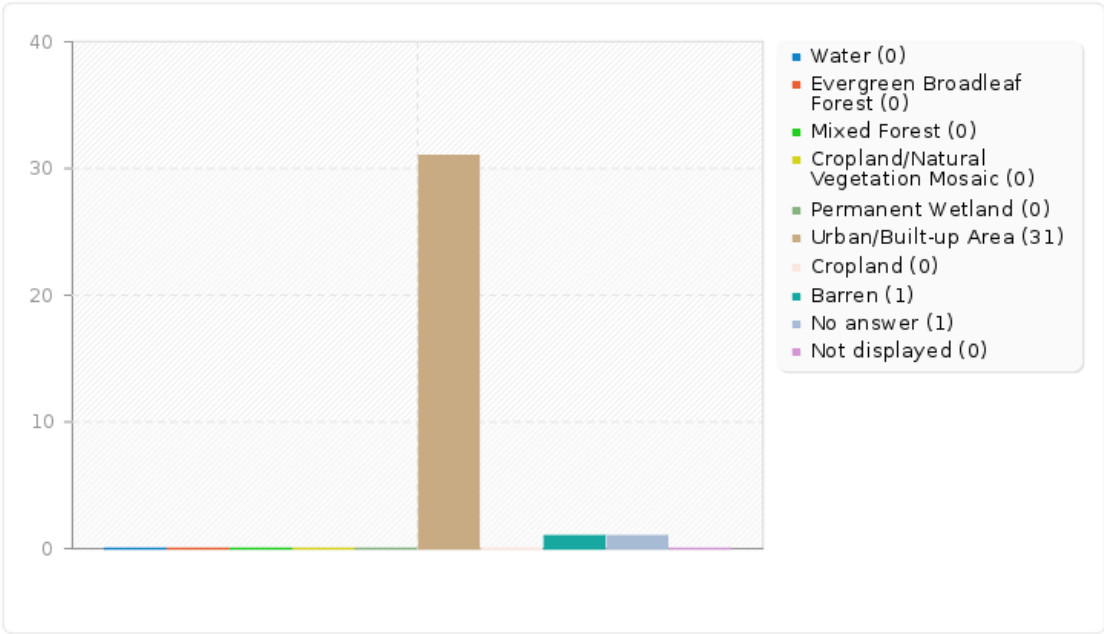

## Field summary for B7(SQ002)

[Point B]

| Answer                                  | Count | Percentage |
|-----------------------------------------|-------|------------|
| Water (A1)                              | 1     | 3.03%      |
| Evergreen Broadleaf Forest (A2)         | 0     | 0.00%      |
| Mixed Forest (A3)                       | 0     | 0.00%      |
| Cropland/Natural Vegetation Mosaic (A4) | 0     | 0.00%      |
| Permanent Wetland (A5)                  | 0     | 0.00%      |
| Urban/Built-up Area (A6)                | 30    | 90.91%     |
| Cropland (A7)                           | 1     | 3.03%      |
| Barren (A8)                             | 0     | 0.00%      |
| No answer                               | 1     | 3.03%      |
| Not displayed                           | 0     | 0.00%      |

Field summary for B7(SQ002)

[Point B]

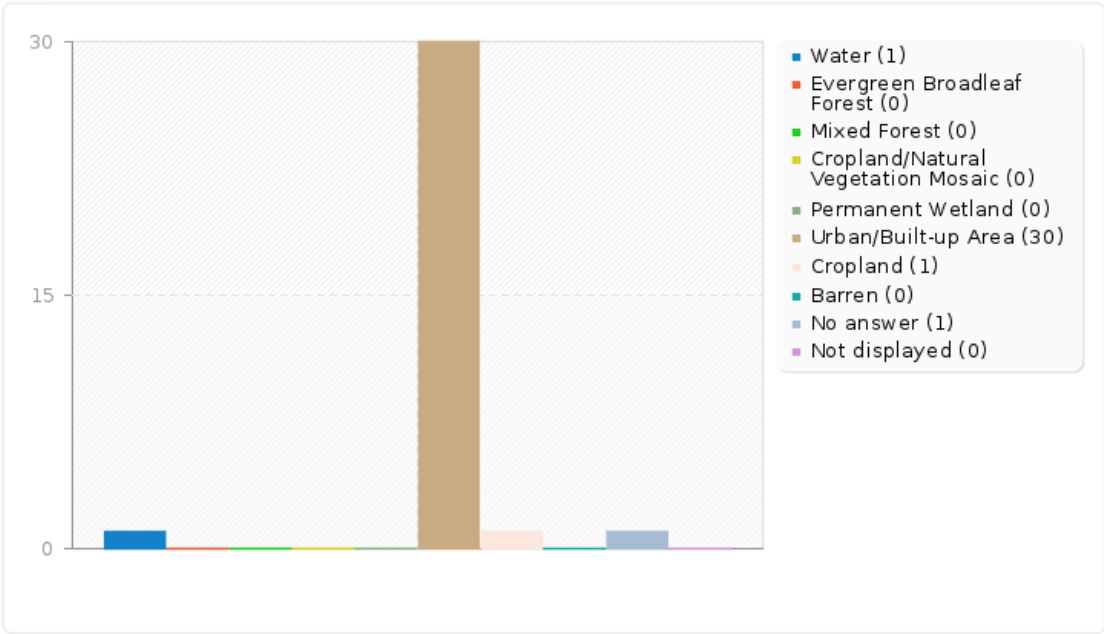

## Field summary for B7(SQ003)

[Point C]

| Answer                                  | Count | Percentage |
|-----------------------------------------|-------|------------|
| Water (A1)                              | 0     | 0.00%      |
| Evergreen Broadleaf Forest (A2)         | 0     | 0.00%      |
| Mixed Forest (A3)                       | 0     | 0.00%      |
| Cropland/Natural Vegetation Mosaic (A4) | 0     | 0.00%      |
| Permanent Wetland (A5)                  | 0     | 0.00%      |
| Urban/Built-up Area (A6)                | 32    | 96.97%     |
| Cropland (A7)                           | 0     | 0.00%      |
| Barren (A8)                             | 0     | 0.00%      |
| No answer                               | 1     | 3.03%      |
| Not displayed                           | 0     | 0.00%      |

Field summary for B7(SQ003)

[Point C]



## Field summary for B8(SQ001)

[Point A]

| Answer                                  | Count | Percentage |
|-----------------------------------------|-------|------------|
| Water (A1)                              | 0     | 0.00%      |
| Evergreen Broadleaf Forest (A2)         | 25    | 75.76%     |
| Mixed Forest (A3)                       | 7     | 21.21%     |
| Cropland/Natural Vegetation Mosaic (A4) | 0     | 0.00%      |
| Permanent Wetland (A5)                  | 0     | 0.00%      |
| Urban/Built-up Area (A6)                | 0     | 0.00%      |
| Cropland (A7)                           | 0     | 0.00%      |
| Barren (A8)                             | 0     | 0.00%      |
| No answer                               | 1     | 3.03%      |
| Not displayed                           | 0     | 0.00%      |

Field summary for B8(SQ001)

[Point A]

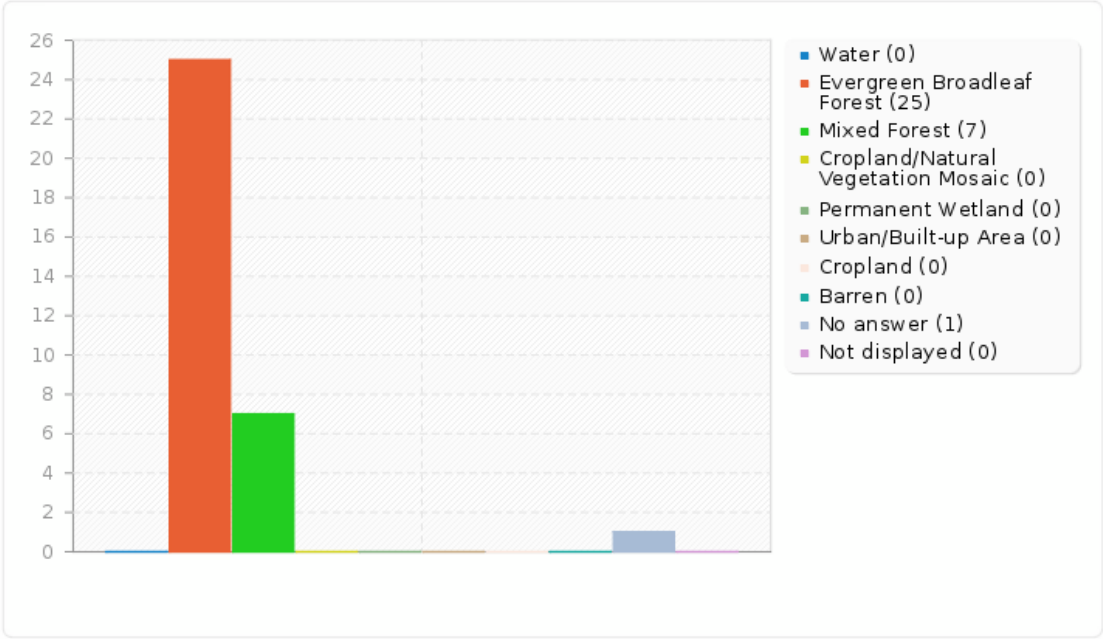



## Field summary for B8(SQ002)

[Point B]

| Answer                                  | Count | Percentage |
|-----------------------------------------|-------|------------|
| Water (A1)                              | 0     | 0.00%      |
| Evergreen Broadleaf Forest (A2)         | 21    | 63.64%     |
| Mixed Forest (A3)                       | 10    | 30.30%     |
| Cropland/Natural Vegetation Mosaic (A4) | 1     | 3.03%      |
| Permanent Wetland (A5)                  | 0     | 0.00%      |
| Urban/Built-up Area (A6)                | 0     | 0.00%      |
| Cropland (A7)                           | 0     | 0.00%      |
| Barren (A8)                             | 0     | 0.00%      |
| No answer                               | 1     | 3.03%      |
| Not displayed                           | 0     | 0.00%      |

Field summary for B8(SQ002)

[Point B]

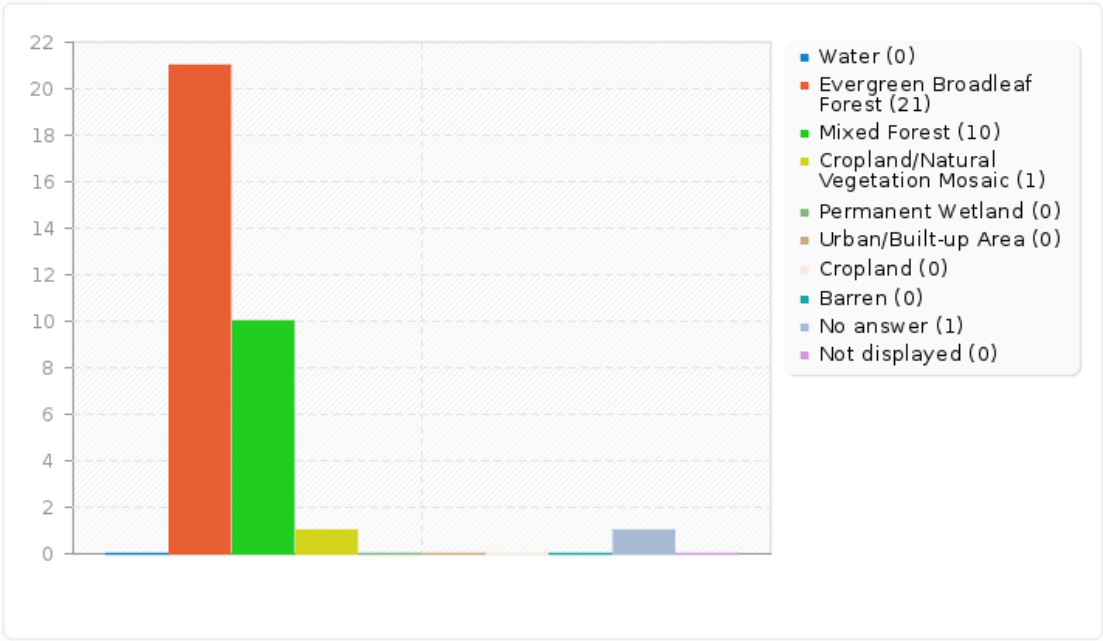

## Field summary for B9(SQ001)

[Point A]

| Answer                                  | Count | Percentage |
|-----------------------------------------|-------|------------|
| Water (A1)                              | 1     | 3.03%      |
| Evergreen Broadleaf Forest (A2)         | 22    | 66.67%     |
| Mixed Forest (A3)                       | 8     | 24.24%     |
| Cropland/Natural Vegetation Mosaic (A4) | 0     | 0.00%      |
| Permanent Wetland (A5)                  | 1     | 3.03%      |
| Urban/Built-up Area (A6)                | 0     | 0.00%      |
| Cropland (A7)                           | 0     | 0.00%      |
| Barren (A8)                             | 0     | 0.00%      |
| No answer                               | 1     | 3.03%      |
| Not displayed                           | 0     | 0.00%      |

Field summary for B9(SQ001)

[Point A]

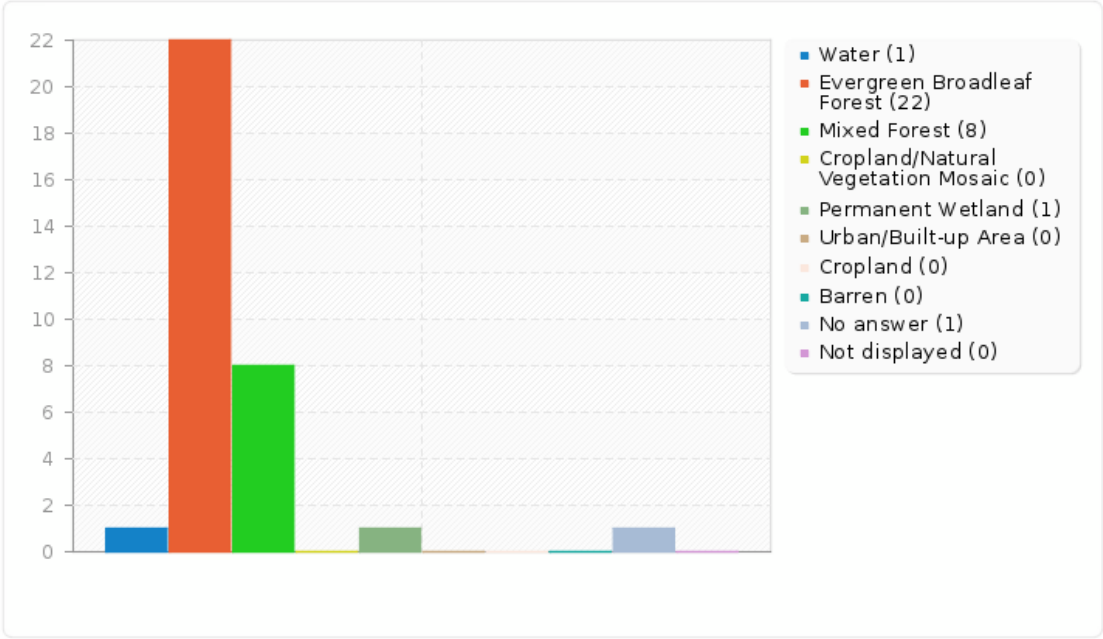

## Field summary for B9(SQ002)

[Point B]

| Answer                                  | Count | Percentage |
|-----------------------------------------|-------|------------|
| Water (A1)                              | 27    | 81.82%     |
| Evergreen Broadleaf Forest (A2)         | 0     | 0.00%      |
| Mixed Forest (A3)                       | 1     | 3.03%      |
| Cropland/Natural Vegetation Mosaic (A4) | 1     | 3.03%      |
| Permanent Wetland (A5)                  | 3     | 9.09%      |
| Urban/Built-up Area (A6)                | 0     | 0.00%      |
| Cropland (A7)                           | 0     | 0.00%      |
| Barren (A8)                             | 0     | 0.00%      |
| No answer                               | 1     | 3.03%      |
| Not displayed                           | 0     | 0.00%      |

Field summary for B9(SQ002)

[Point B]

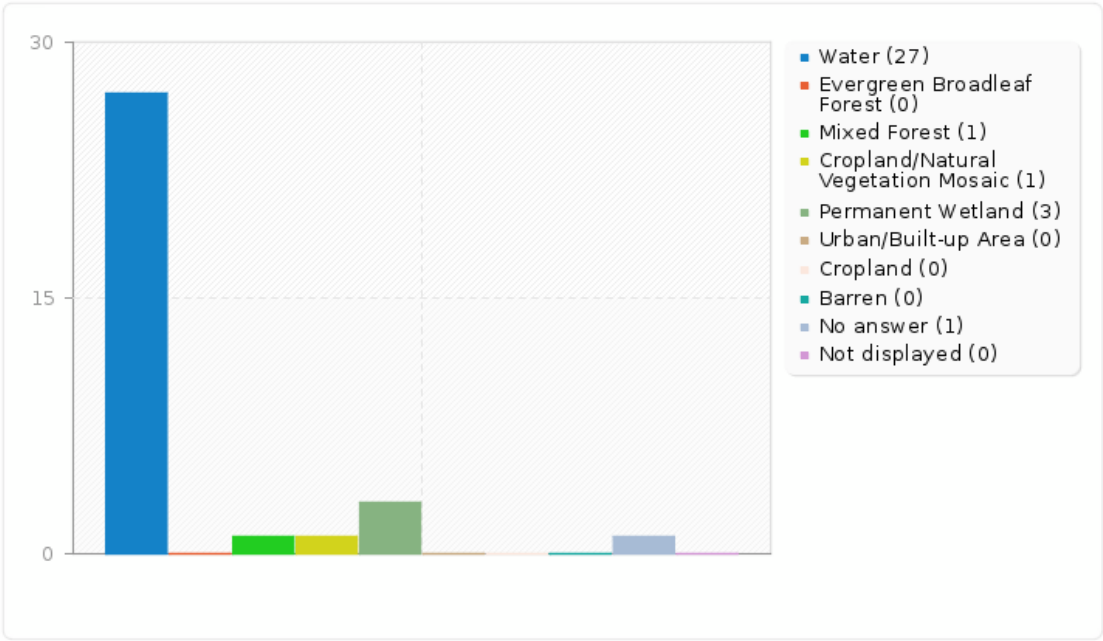

## Field summary for B10(SQ001)

[Point A]

| Answer                                  | Count | Percentage |
|-----------------------------------------|-------|------------|
| Water (A1)                              | 0     | 0.00%      |
| Evergreen Broadleaf Forest (A2)         | 19    | 57.58%     |
| Mixed Forest (A3)                       | 11    | 33.33%     |
| Cropland/Natural Vegetation Mosaic (A4) | 1     | 3.03%      |
| Permanent Wetland (A5)                  | 1     | 3.03%      |
| Urban/Built-up Area (A6)                | 0     | 0.00%      |
| Cropland (A7)                           | 0     | 0.00%      |
| Barren (A8)                             | 0     | 0.00%      |
| No answer                               | 1     | 3.03%      |
| Not displayed                           | 0     | 0.00%      |

Field summary for B10(SQ001)

[Point A]

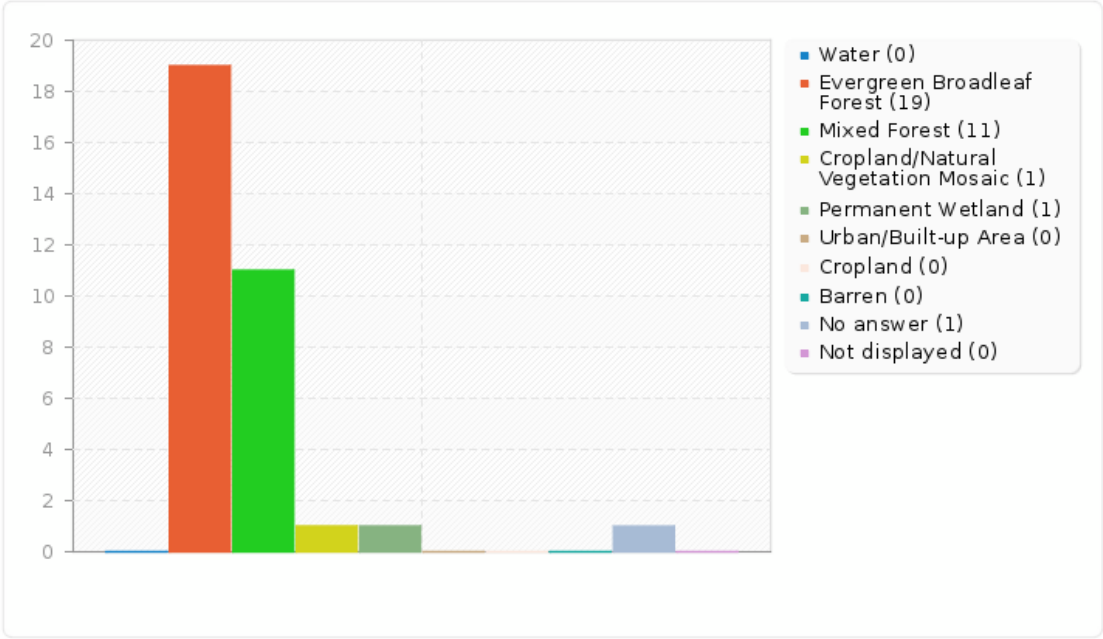



## Field summary for B11(SQ001)

[Point A]

| Answer                                  | Count | Percentage |
|-----------------------------------------|-------|------------|
| Water (A1)                              | 0     | 0.00%      |
| Evergreen Broadleaf Forest (A2)         | 1     | 3.03%      |
| Mixed Forest (A3)                       | 2     | 6.06%      |
| Cropland/Natural Vegetation Mosaic (A4) | 9     | 27.27%     |
| Permanent Wetland (A5)                  | 0     | 0.00%      |
| Urban/Built-up Area (A6)                | 10    | 30.30%     |
| Cropland (A7)                           | 5     | 15.15%     |
| Barren (A8)                             | 5     | 15.15%     |
| No answer                               | 1     | 3.03%      |
| Not displayed                           | 0     | 0.00%      |

## Field summary for B11(SQ001)

[Point A]

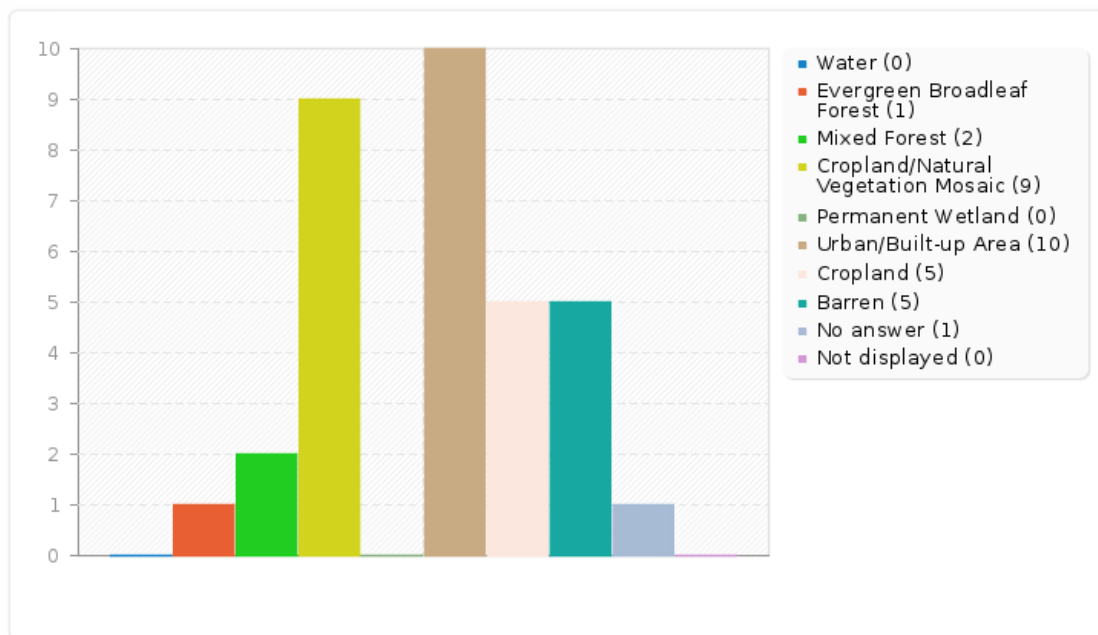

## Field summary for B11(SQ002)

[Point B]

| Answer                                  | Count | Percentage |
|-----------------------------------------|-------|------------|
| Water (A1)                              | 0     | 0.00%      |
| Evergreen Broadleaf Forest (A2)         | 0     | 0.00%      |
| Mixed Forest (A3)                       | 1     | 3.03%      |
| Cropland/Natural Vegetation Mosaic (A4) | 6     | 18.18%     |
| Permanent Wetland (A5)                  | 0     | 0.00%      |
| Urban/Built-up Area (A6)                | 10    | 30.30%     |
| Cropland (A7)                           | 7     | 21.21%     |
| Barren (A8)                             | 8     | 24.24%     |
| No answer                               | 1     | 3.03%      |
| Not displayed                           | 0     | 0.00%      |

## Field summary for B11(SQ002)

[Point B]

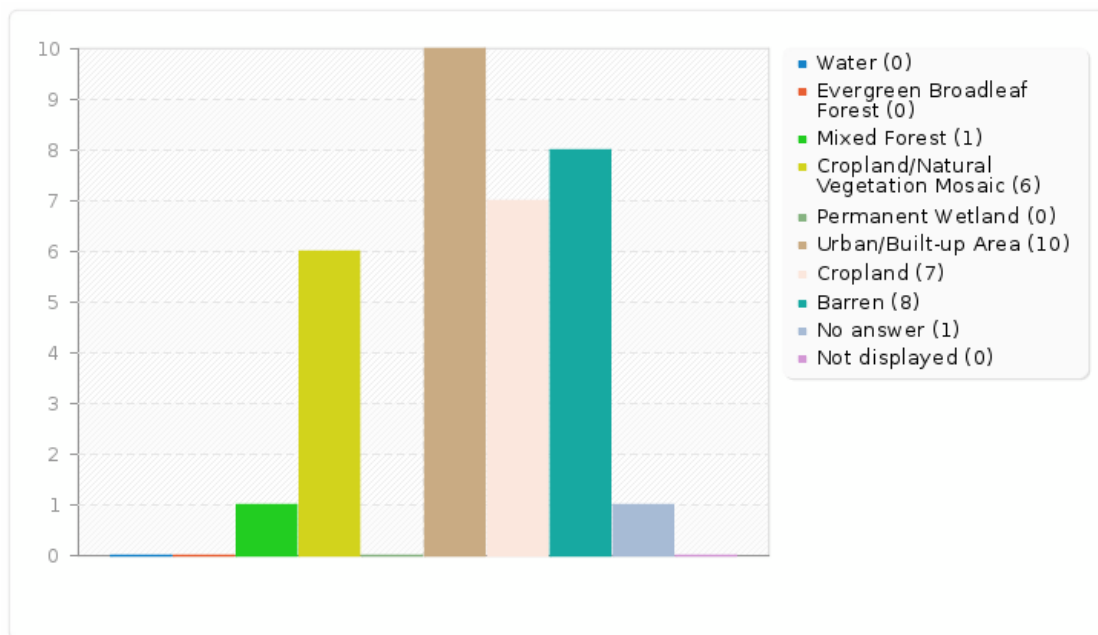

## Field summary for B12(SQ001)

[Point A]

| Answer                                  | Count | Percentage |
|-----------------------------------------|-------|------------|
| Water (A1)                              | 1     | 3.03%      |
| Evergreen Broadleaf Forest (A2)         | 1     | 3.03%      |
| Mixed Forest (A3)                       | 3     | 9.09%      |
| Cropland/Natural Vegetation Mosaic (A4) | 21    | 63.64%     |
| Permanent Wetland (A5)                  | 3     | 9.09%      |
| Urban/Built-up Area (A6)                | 1     | 3.03%      |
| Cropland (A7)                           | 1     | 3.03%      |
| Barren (A8)                             | 1     | 3.03%      |
| No answer                               | 1     | 3.03%      |
| Not displayed                           | 0     | 0.00%      |

## Field summary for B12(SQ001)

[Point A]

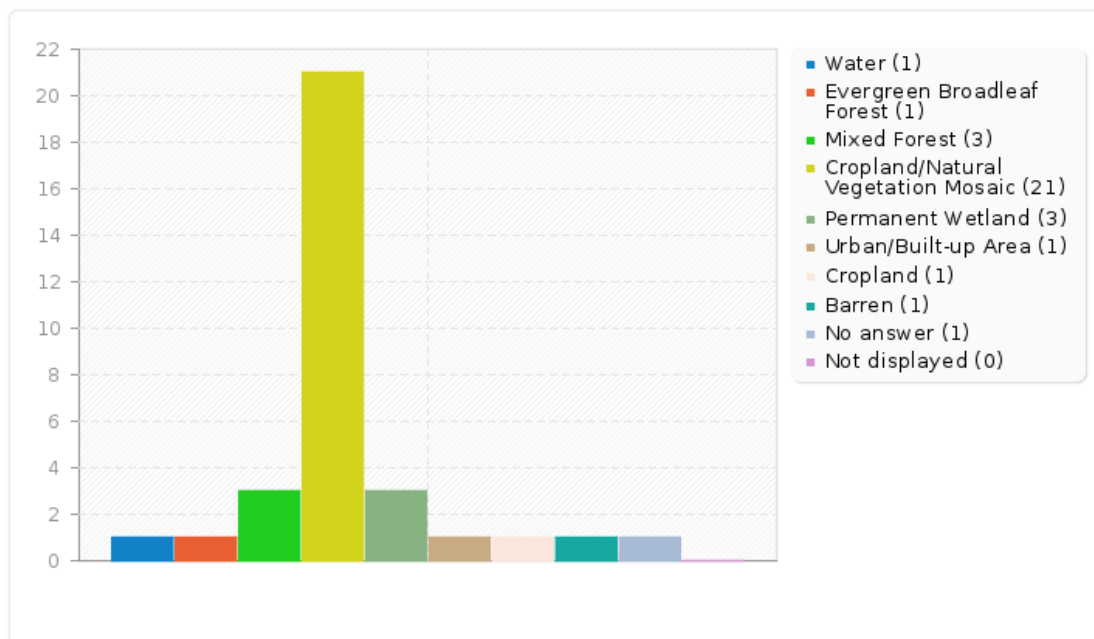

## Field summary for B12(SQ002)

[Point B]

| Answer                                  | Count | Percentage |
|-----------------------------------------|-------|------------|
| Water (A1)                              | 28    | 84.85%     |
| Evergreen Broadleaf Forest (A2)         | 0     | 0.00%      |
| Mixed Forest (A3)                       | 0     | 0.00%      |
| Cropland/Natural Vegetation Mosaic (A4) | 1     | 3.03%      |
| Permanent Wetland (A5)                  | 2     | 6.06%      |
| Urban/Built-up Area (A6)                | 0     | 0.00%      |
| Cropland (A7)                           | 0     | 0.00%      |
| Barren (A8)                             | 1     | 3.03%      |
| No answer                               | 1     | 3.03%      |
| Not displayed                           | 0     | 0.00%      |

Field summary for B12(SQ002)

[Point B]

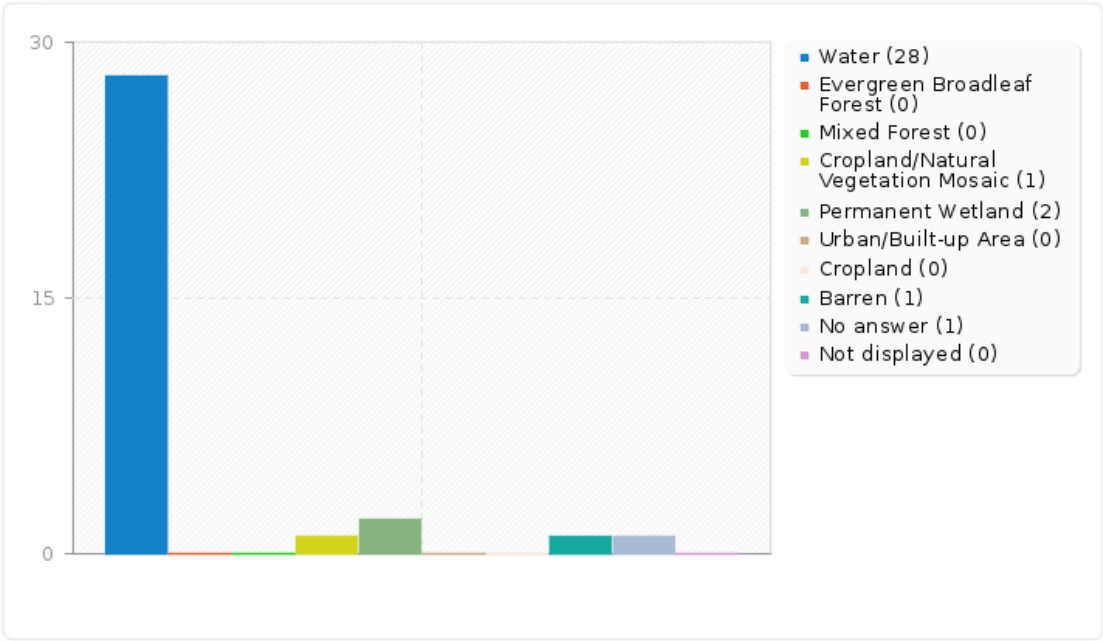



## Field summary for B13(SQ001)

[Point A]

| Answer                                  | Count | Percentage |
|-----------------------------------------|-------|------------|
| Water (A1)                              | 0     | 0.00%      |
| Evergreen Broadleaf Forest (A2)         | 20    | 60.61%     |
| Mixed Forest (A3)                       | 12    | 36.36%     |
| Cropland/Natural Vegetation Mosaic (A4) | 0     | 0.00%      |
| Permanent Wetland (A5)                  | 0     | 0.00%      |
| Urban/Built-up Area (A6)                | 0     | 0.00%      |
| Cropland (A7)                           | 0     | 0.00%      |
| Barren (A8)                             | 0     | 0.00%      |
| No answer                               | 1     | 3.03%      |
| Not displayed                           | 0     | 0.00%      |

Field summary for B13(SQ001)

[Point A]

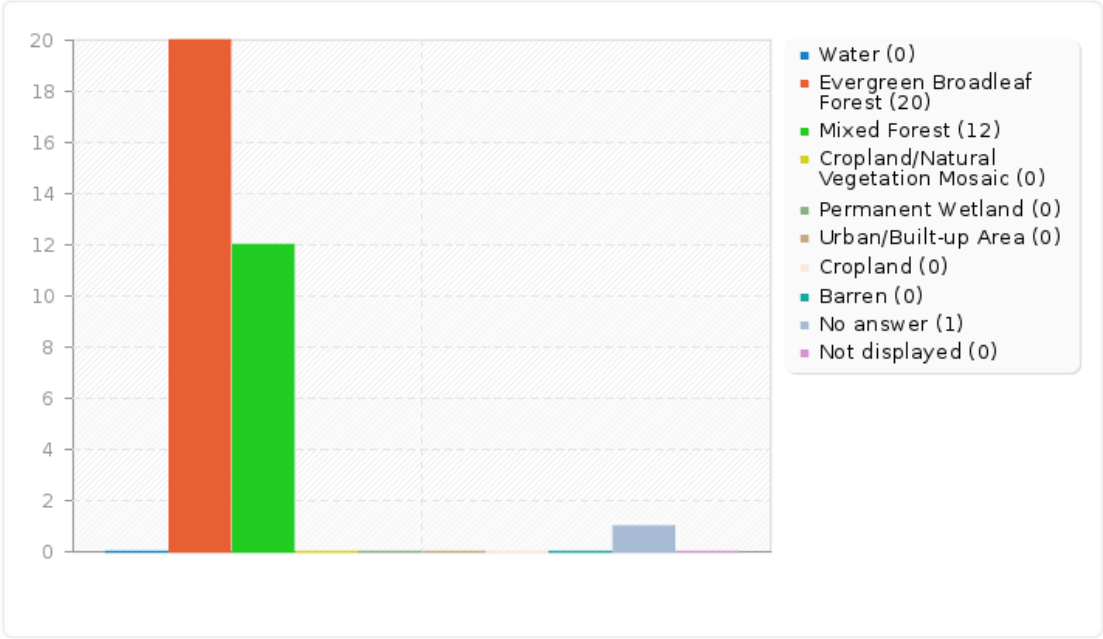

## Field summary for B14(SQ001)

[Point A]

| Answer                                  | Count | Percentage |
|-----------------------------------------|-------|------------|
| Water (A1)                              | 0     | 0.00%      |
| Evergreen Broadleaf Forest (A2)         | 0     | 0.00%      |
| Mixed Forest (A3)                       | 1     | 3.03%      |
| Cropland/Natural Vegetation Mosaic (A4) | 4     | 12.12%     |
| Permanent Wetland (A5)                  | 1     | 3.03%      |
| Urban/Built-up Area (A6)                | 20    | 60.61%     |
| Cropland (A7)                           | 6     | 18.18%     |
| Barren (A8)                             | 0     | 0.00%      |
| No answer                               | 1     | 3.03%      |
| Not displayed                           | 0     | 0.00%      |

## Field summary for B14(SQ001)

[Point A]

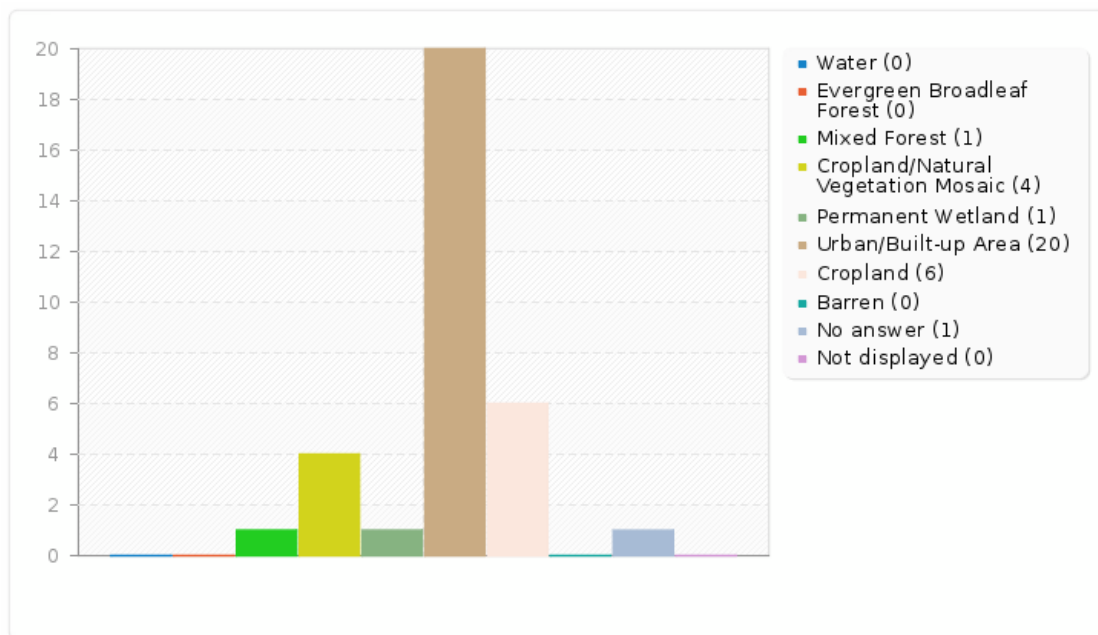

## Field summary for B14(SQ002)

[Point B]

| Answer                                  | Count | Percentage |
|-----------------------------------------|-------|------------|
| Water (A1)                              | 0     | 0.00%      |
| Evergreen Broadleaf Forest (A2)         | 7     | 21.21%     |
| Mixed Forest (A3)                       | 12    | 36.36%     |
| Cropland/Natural Vegetation Mosaic (A4) | 9     | 27.27%     |
| Permanent Wetland (A5)                  | 0     | 0.00%      |
| Urban/Built-up Area (A6)                | 0     | 0.00%      |
| Cropland (A7)                           | 4     | 12.12%     |
| Barren (A8)                             | 0     | 0.00%      |
| No answer                               | 1     | 3.03%      |
| Not displayed                           | 0     | 0.00%      |

Field summary for B14(SQ002)

[Point B]

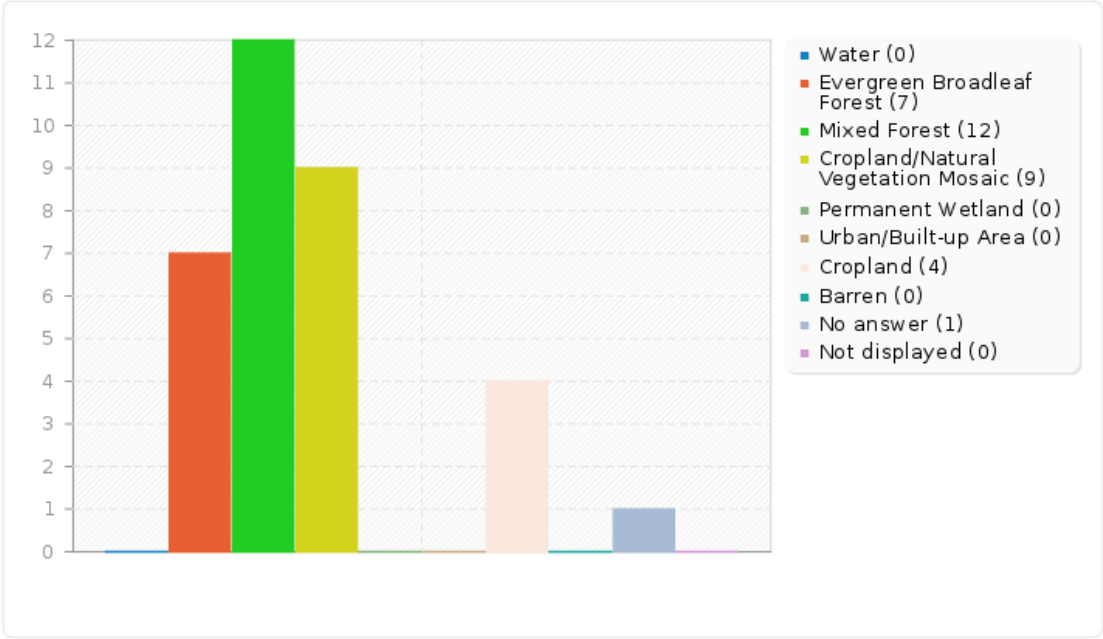

## Field summary for B15(SQ001)

[Point A]

| Answer                                  | Count | Percentage |
|-----------------------------------------|-------|------------|
| Water (A1)                              | 0     | 0.00%      |
| Evergreen Broadleaf Forest (A2)         | 23    | 69.70%     |
| Mixed Forest (A3)                       | 8     | 24.24%     |
| Cropland/Natural Vegetation Mosaic (A4) | 1     | 3.03%      |
| Permanent Wetland (A5)                  | 0     | 0.00%      |
| Urban/Built-up Area (A6)                | 0     | 0.00%      |
| Cropland (A7)                           | 0     | 0.00%      |
| Barren (A8)                             | 0     | 0.00%      |
| No answer                               | 1     | 3.03%      |
| Not displayed                           | 0     | 0.00%      |

Field summary for B15(SQ001)

[Point A]

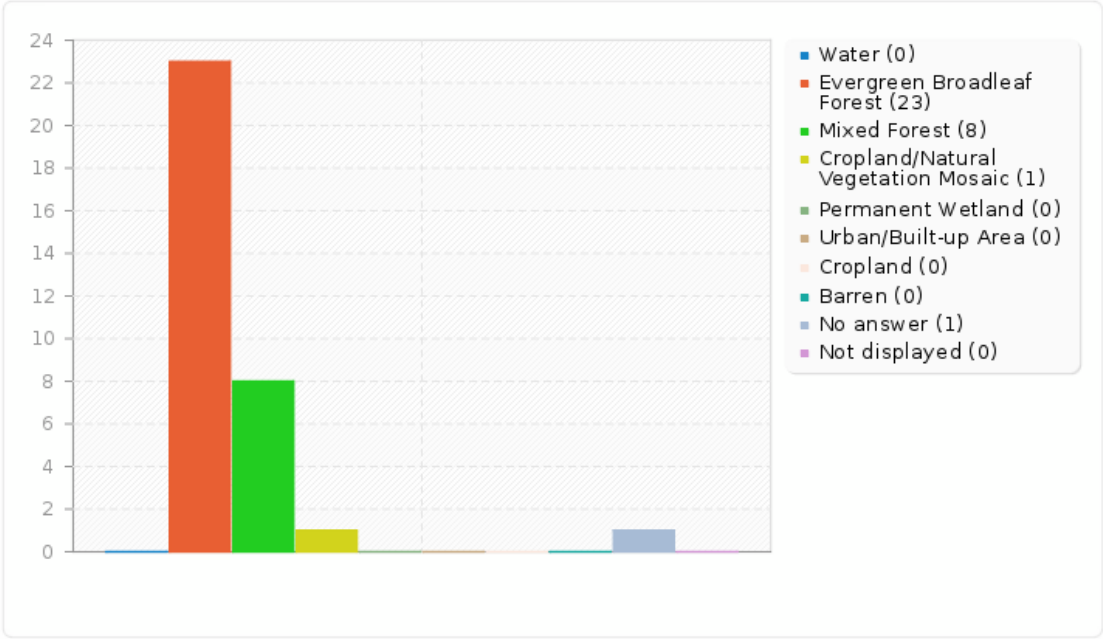



## Field summary for B16(SQ001)

[Point A]

| Answer                                  | Count | Percentage |
|-----------------------------------------|-------|------------|
| Water (A1)                              | 0     | 0.00%      |
| Evergreen Broadleaf Forest (A2)         | 0     | 0.00%      |
| Mixed Forest (A3)                       | 0     | 0.00%      |
| Cropland/Natural Vegetation Mosaic (A4) | 0     | 0.00%      |
| Permanent Wetland (A5)                  | 0     | 0.00%      |
| Urban/Built-up Area (A6)                | 32    | 96.97%     |
| Cropland (A7)                           | 0     | 0.00%      |
| Barren (A8)                             | 0     | 0.00%      |
| No answer                               | 1     | 3.03%      |
| Not displayed                           | 0     | 0.00%      |

Field summary for B16(SQ001)

[Point A]



## Field summary for B16(SQ002)

[Point B]

| Answer                                  | Count | Percentage |
|-----------------------------------------|-------|------------|
| Water (A1)                              | 0     | 0.00%      |
| Evergreen Broadleaf Forest (A2)         | 0     | 0.00%      |
| Mixed Forest (A3)                       | 0     | 0.00%      |
| Cropland/Natural Vegetation Mosaic (A4) | 0     | 0.00%      |
| Permanent Wetland (A5)                  | 0     | 0.00%      |
| Urban/Built-up Area (A6)                | 32    | 96.97%     |
| Cropland (A7)                           | 0     | 0.00%      |
| Barren (A8)                             | 0     | 0.00%      |
| No answer                               | 1     | 3.03%      |
| Not displayed                           | 0     | 0.00%      |

Field summary for B16(SQ002)

[Point B]



## Field summary for B17(SQ001)

[Point A]

| Answer                                  | Count | Percentage |
|-----------------------------------------|-------|------------|
| Water (A1)                              | 0     | 0.00%      |
| Evergreen Broadleaf Forest (A2)         | 0     | 0.00%      |
| Mixed Forest (A3)                       | 0     | 0.00%      |
| Cropland/Natural Vegetation Mosaic (A4) | 0     | 0.00%      |
| Permanent Wetland (A5)                  | 0     | 0.00%      |
| Urban/Built-up Area (A6)                | 32    | 96.97%     |
| Cropland (A7)                           | 0     | 0.00%      |
| Barren (A8)                             | 0     | 0.00%      |
| No answer                               | 1     | 3.03%      |
| Not displayed                           | 0     | 0.00%      |

Field summary for B17(SQ001)

[Point A]



## Field summary for B18(SQ001)

[Point A]

| Answer                                  | Count | Percentage |
|-----------------------------------------|-------|------------|
| Water (A1)                              | 0     | 0.00%      |
| Evergreen Broadleaf Forest (A2)         | 14    | 42.42%     |
| Mixed Forest (A3)                       | 14    | 42.42%     |
| Cropland/Natural Vegetation Mosaic (A4) | 4     | 12.12%     |
| Permanent Wetland (A5)                  | 0     | 0.00%      |
| Urban/Built-up Area (A6)                | 0     | 0.00%      |
| Cropland (A7)                           | 0     | 0.00%      |
| Barren (A8)                             | 0     | 0.00%      |
| No answer                               | 1     | 3.03%      |
| Not displayed                           | 0     | 0.00%      |

Field summary for B18(SQ001)

[Point A]

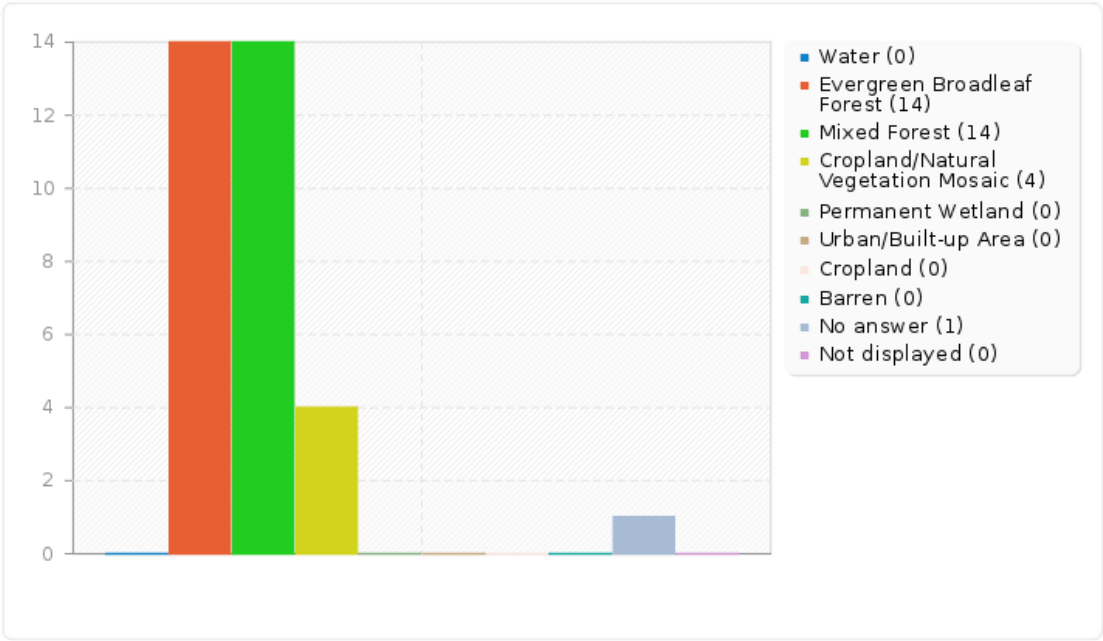



## Field summary for B18(SQ002)

[Point B]

| Answer                                  | Count | Percentage |
|-----------------------------------------|-------|------------|
| Water (A1)                              | 0     | 0.00%      |
| Evergreen Broadleaf Forest (A2)         | 0     | 0.00%      |
| Mixed Forest (A3)                       | 1     | 3.03%      |
| Cropland/Natural Vegetation Mosaic (A4) | 1     | 3.03%      |
| Permanent Wetland (A5)                  | 0     | 0.00%      |
| Urban/Built-up Area (A6)                | 27    | 81.82%     |
| Cropland (A7)                           | 0     | 0.00%      |
| Barren (A8)                             | 3     | 9.09%      |
| No answer                               | 1     | 3.03%      |
| Not displayed                           | 0     | 0.00%      |

Field summary for B18(SQ002)

[Point B]

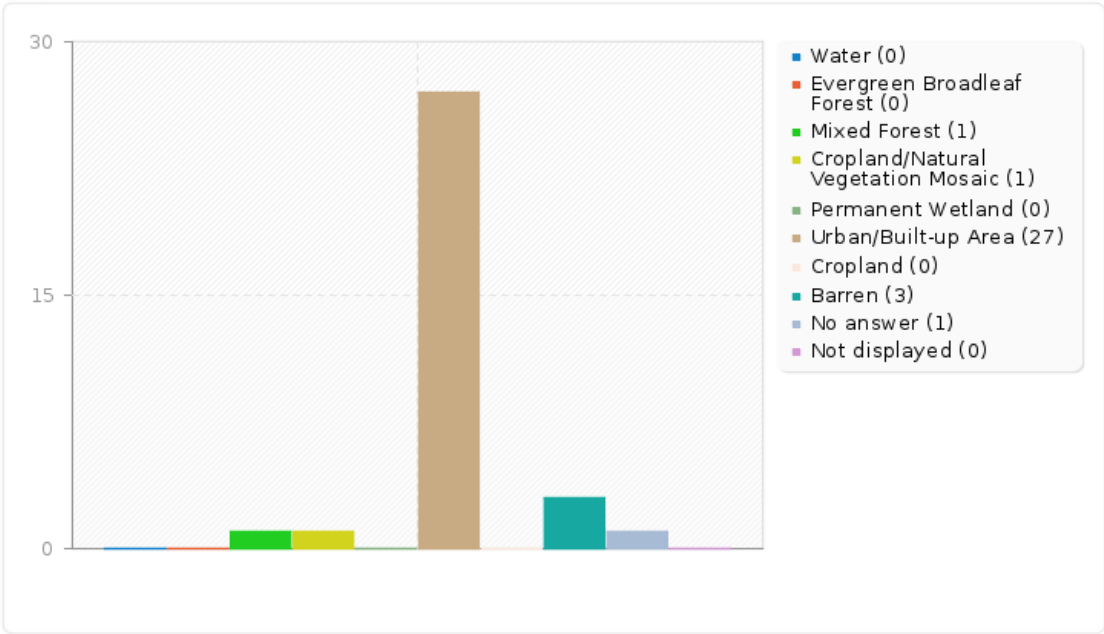

## Field summary for B18(SQ003)

[Point C]

| Answer                                  | Count | Percentage |
|-----------------------------------------|-------|------------|
| Water (A1)                              | 0     | 0.00%      |
| Evergreen Broadleaf Forest (A2)         | 11    | 33.33%     |
| Mixed Forest (A3)                       | 13    | 39.39%     |
| Cropland/Natural Vegetation Mosaic (A4) | 6     | 18.18%     |
| Permanent Wetland (A5)                  | 0     | 0.00%      |
| Urban/Built-up Area (A6)                | 2     | 6.06%      |
| Cropland (A7)                           | 0     | 0.00%      |
| Barren (A8)                             | 0     | 0.00%      |
| No answer                               | 1     | 3.03%      |
| Not displayed                           | 0     | 0.00%      |

Field summary for B18(SQ003)

[Point C]

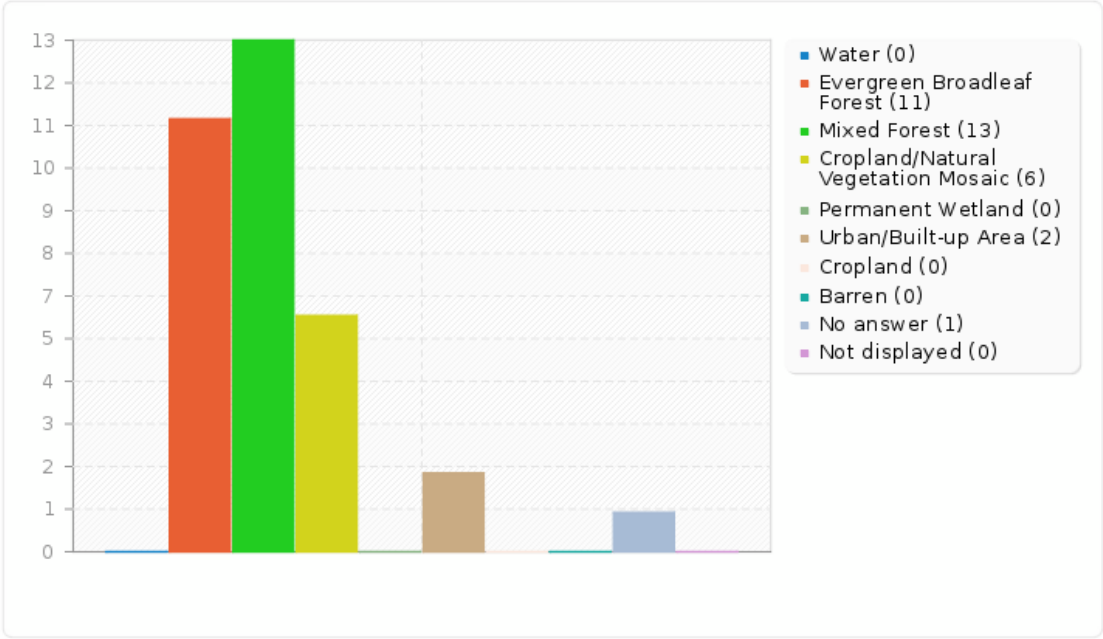

## Field summary for B19(SQ001)

[Point A]

| Answer                                  | Count | Percentage |
|-----------------------------------------|-------|------------|
| Water (A1)                              | 0     | 0.00%      |
| Evergreen Broadleaf Forest (A2)         | 23    | 69.70%     |
| Mixed Forest (A3)                       | 7     | 21.21%     |
| Cropland/Natural Vegetation Mosaic (A4) | 0     | 0.00%      |
| Permanent Wetland (A5)                  | 2     | 6.06%      |
| Urban/Built-up Area (A6)                | 0     | 0.00%      |
| Cropland (A7)                           | 0     | 0.00%      |
| Barren (A8)                             | 0     | 0.00%      |
| No answer                               | 1     | 3.03%      |
| Not displayed                           | 0     | 0.00%      |

Field summary for B19(SQ001)

[Point A]

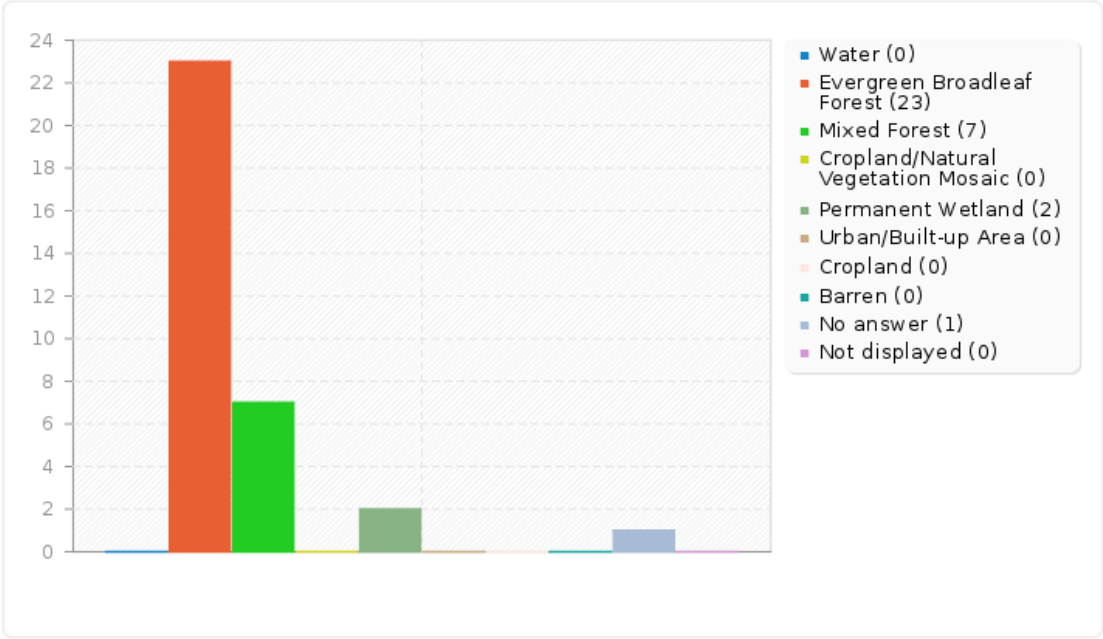

## Field summary for B19(SQ002)

[Point B]

| Answer                                  | Count | Percentage |
|-----------------------------------------|-------|------------|
| Water (A1)                              | 3     | 9.09%      |
| Evergreen Broadleaf Forest (A2)         | 18    | 54.55%     |
| Mixed Forest (A3)                       | 9     | 27.27%     |
| Cropland/Natural Vegetation Mosaic (A4) | 0     | 0.00%      |
| Permanent Wetland (A5)                  | 2     | 6.06%      |
| Urban/Built-up Area (A6)                | 0     | 0.00%      |
| Cropland (A7)                           | 0     | 0.00%      |
| Barren (A8)                             | 0     | 0.00%      |
| No answer                               | 1     | 3.03%      |
| Not displayed                           | 0     | 0.00%      |

Field summary for B19(SQ002)

[Point B]

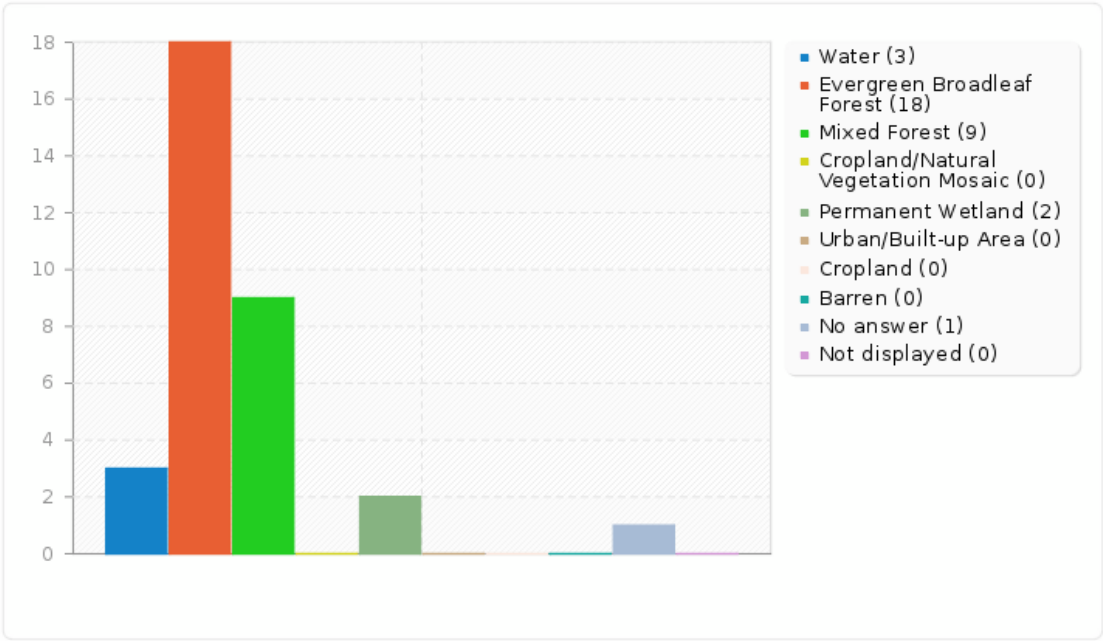



## Field summary for B19(SQ003)

[Point C]

| Answer                                  | Count | Percentage |
|-----------------------------------------|-------|------------|
| Water (A1)                              | 28    | 84.85%     |
| Evergreen Broadleaf Forest (A2)         | 2     | 6.06%      |
| Mixed Forest (A3)                       | 1     | 3.03%      |
| Cropland/Natural Vegetation Mosaic (A4) | 0     | 0.00%      |
| Permanent Wetland (A5)                  | 1     | 3.03%      |
| Urban/Built-up Area (A6)                | 0     | 0.00%      |
| Cropland (A7)                           | 0     | 0.00%      |
| Barren (A8)                             | 0     | 0.00%      |
| No answer                               | 1     | 3.03%      |
| Not displayed                           | 0     | 0.00%      |

Field summary for B19(SQ003)

[Point C]

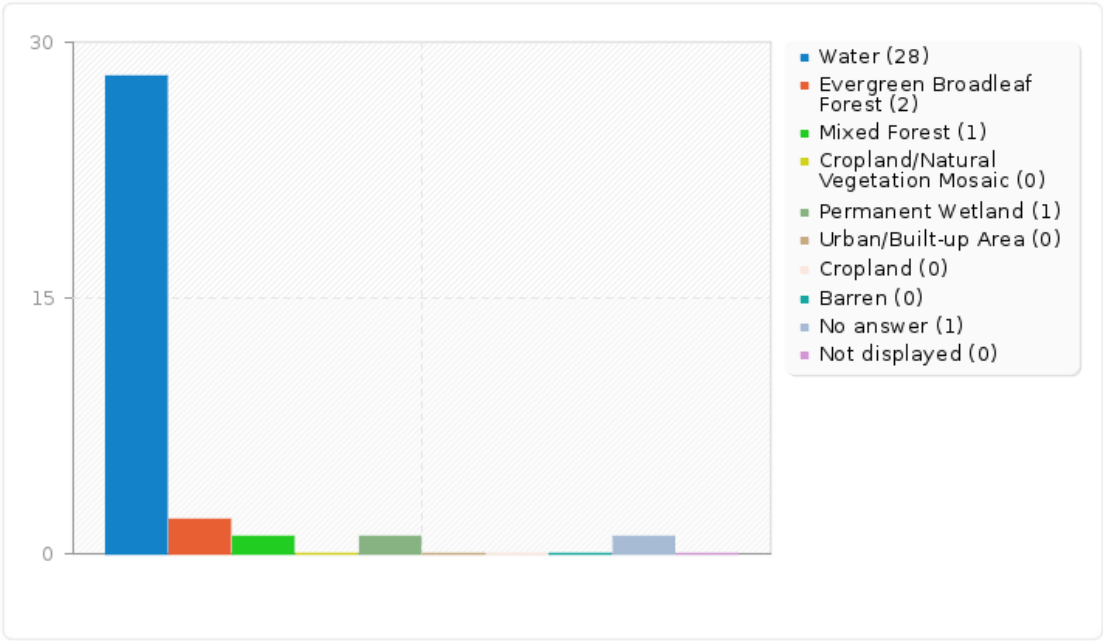

## Field summary for B20(SQ001)

[Point A]

| Answer                                  | Count | Percentage |
|-----------------------------------------|-------|------------|
| Water (A1)                              | 0     | 0.00%      |
| Evergreen Broadleaf Forest (A2)         | 0     | 0.00%      |
| Mixed Forest (A3)                       | 0     | 0.00%      |
| Cropland/Natural Vegetation Mosaic (A4) | 0     | 0.00%      |
| Permanent Wetland (A5)                  | 0     | 0.00%      |
| Urban/Built-up Area (A6)                | 32    | 96.97%     |
| Cropland (A7)                           | 0     | 0.00%      |
| Barren (A8)                             | 0     | 0.00%      |
| No answer                               | 1     | 3.03%      |
| Not displayed                           | 0     | 0.00%      |

Field summary for B20(SQ001)

[Point A]



## Field summary for B21(SQ001)

[Point A]

| Answer                                  | Count | Percentage |
|-----------------------------------------|-------|------------|
| Water (A1)                              | 0     | 0.00%      |
| Evergreen Broadleaf Forest (A2)         | 0     | 0.00%      |
| Mixed Forest (A3)                       | 0     | 0.00%      |
| Cropland/Natural Vegetation Mosaic (A4) | 0     | 0.00%      |
| Permanent Wetland (A5)                  | 0     | 0.00%      |
| Urban/Built-up Area (A6)                | 32    | 96.97%     |
| Cropland (A7)                           | 0     | 0.00%      |
| Barren (A8)                             | 0     | 0.00%      |
| No answer                               | 1     | 3.03%      |
| Not displayed                           | 0     | 0.00%      |

Field summary for B21(SQ001)

[Point A]



## Field summary for B21(SQ002)

[Point B]

| Answer                                  | Count | Percentage |
|-----------------------------------------|-------|------------|
| Water (A1)                              | 0     | 0.00%      |
| Evergreen Broadleaf Forest (A2)         | 0     | 0.00%      |
| Mixed Forest (A3)                       | 0     | 0.00%      |
| Cropland/Natural Vegetation Mosaic (A4) | 0     | 0.00%      |
| Permanent Wetland (A5)                  | 0     | 0.00%      |
| Urban/Built-up Area (A6)                | 32    | 96.97%     |
| Cropland (A7)                           | 0     | 0.00%      |
| Barren (A8)                             | 0     | 0.00%      |
| No answer                               | 1     | 3.03%      |
| Not displayed                           | 0     | 0.00%      |

Field summary for B21(SQ002)

[Point B]





## Field summary for B22(SQ001)

[Point A]

| Answer                                  | Count | Percentage |
|-----------------------------------------|-------|------------|
| Water (A1)                              | 0     | 0.00%      |
| Evergreen Broadleaf Forest (A2)         | 0     | 0.00%      |
| Mixed Forest (A3)                       | 0     | 0.00%      |
| Cropland/Natural Vegetation Mosaic (A4) | 1     | 3.03%      |
| Permanent Wetland (A5)                  | 0     | 0.00%      |
| Urban/Built-up Area (A6)                | 30    | 90.91%     |
| Cropland (A7)                           | 1     | 3.03%      |
| Barren (A8)                             | 0     | 0.00%      |
| No answer                               | 1     | 3.03%      |
| Not displayed                           | 0     | 0.00%      |

Field summary for B22(SQ001)

[Point A]

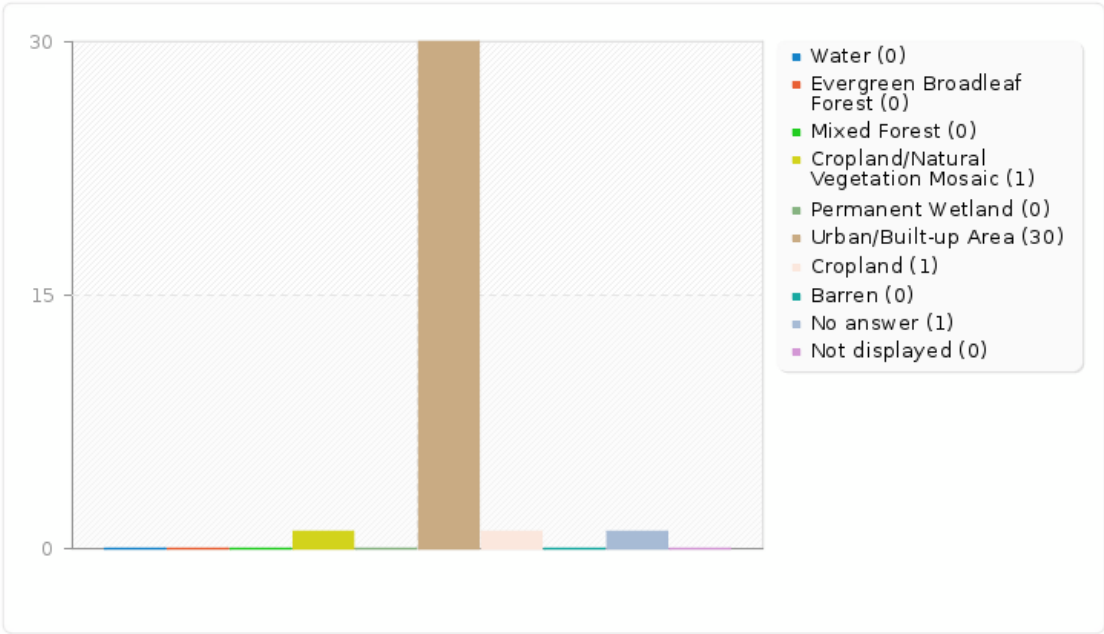

## Field summary for B22(SQ002)

[Point B]

| Answer                                  | Count | Percentage |
|-----------------------------------------|-------|------------|
| Water (A1)                              | 2     | 6.06%      |
| Evergreen Broadleaf Forest (A2)         | 0     | 0.00%      |
| Mixed Forest (A3)                       | 0     | 0.00%      |
| Cropland/Natural Vegetation Mosaic (A4) | 0     | 0.00%      |
| Permanent Wetland (A5)                  | 0     | 0.00%      |
| Urban/Built-up Area (A6)                | 30    | 90.91%     |
| Cropland (A7)                           | 0     | 0.00%      |
| Barren (A8)                             | 0     | 0.00%      |
| No answer                               | 1     | 3.03%      |
| Not displayed                           | 0     | 0.00%      |

Field summary for B22(SQ002)

[Point B]

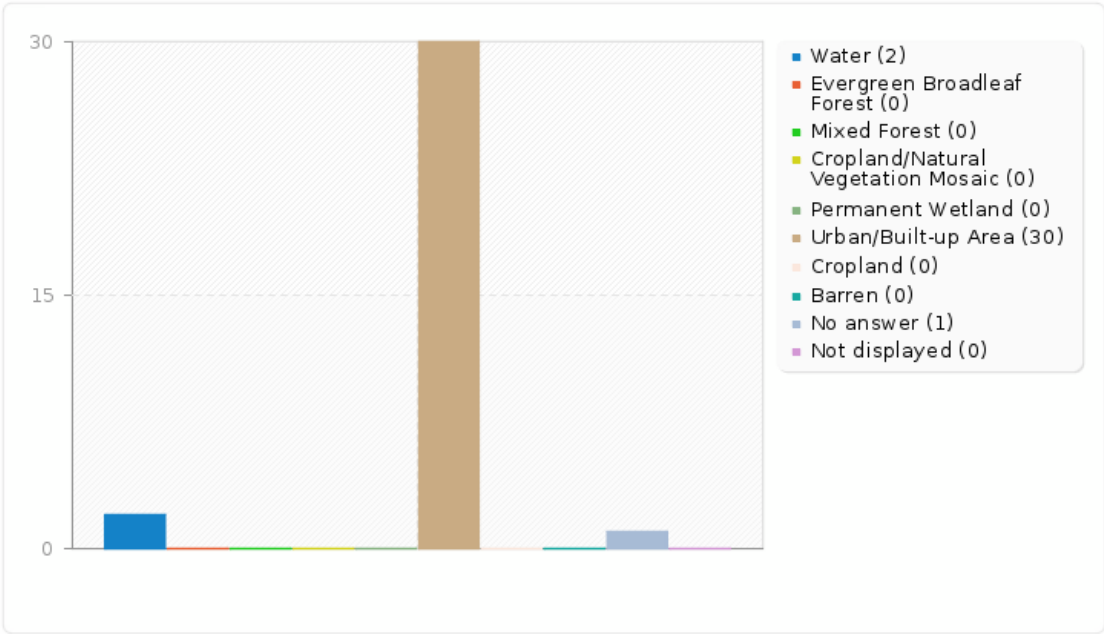

## Field summary for B23(SQ001)

[Point A]

| Answer                                  | Count | Percentage |
|-----------------------------------------|-------|------------|
| Water (A1)                              | 0     | 0.00%      |
| Evergreen Broadleaf Forest (A2)         | 23    | 69.70%     |
| Mixed Forest (A3)                       | 9     | 27.27%     |
| Cropland/Natural Vegetation Mosaic (A4) | 0     | 0.00%      |
| Permanent Wetland (A5)                  | 0     | 0.00%      |
| Urban/Built-up Area (A6)                | 0     | 0.00%      |
| Cropland (A7)                           | 0     | 0.00%      |
| Barren (A8)                             | 0     | 0.00%      |
| No answer                               | 1     | 3.03%      |
| Not displayed                           | 0     | 0.00%      |

Field summary for B23(SQ001)

[Point A]

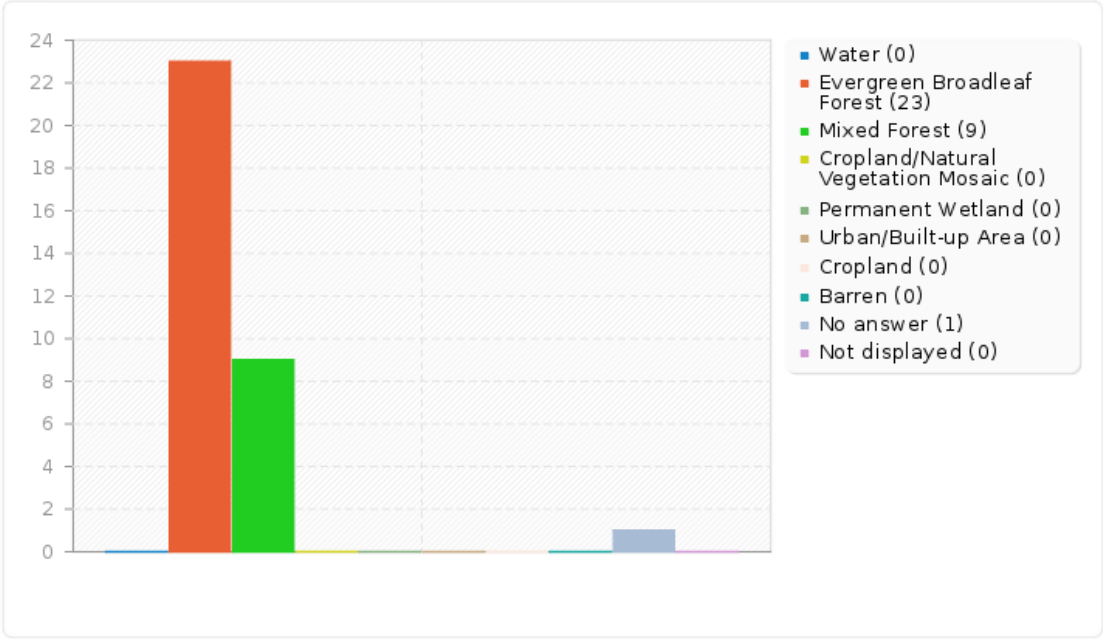

## Field summary for B23(SQ002)

[Point B]

| Answer                                  | Count | Percentage |
|-----------------------------------------|-------|------------|
| Water (A1)                              | 0     | 0.00%      |
| Evergreen Broadleaf Forest (A2)         | 24    | 72.73%     |
| Mixed Forest (A3)                       | 8     | 24.24%     |
| Cropland/Natural Vegetation Mosaic (A4) | 0     | 0.00%      |
| Permanent Wetland (A5)                  | 0     | 0.00%      |
| Urban/Built-up Area (A6)                | 0     | 0.00%      |
| Cropland (A7)                           | 0     | 0.00%      |
| Barren (A8)                             | 0     | 0.00%      |
| No answer                               | 1     | 3.03%      |
| Not displayed                           | 0     | 0.00%      |

Field summary for B23(SQ002)

[Point B]

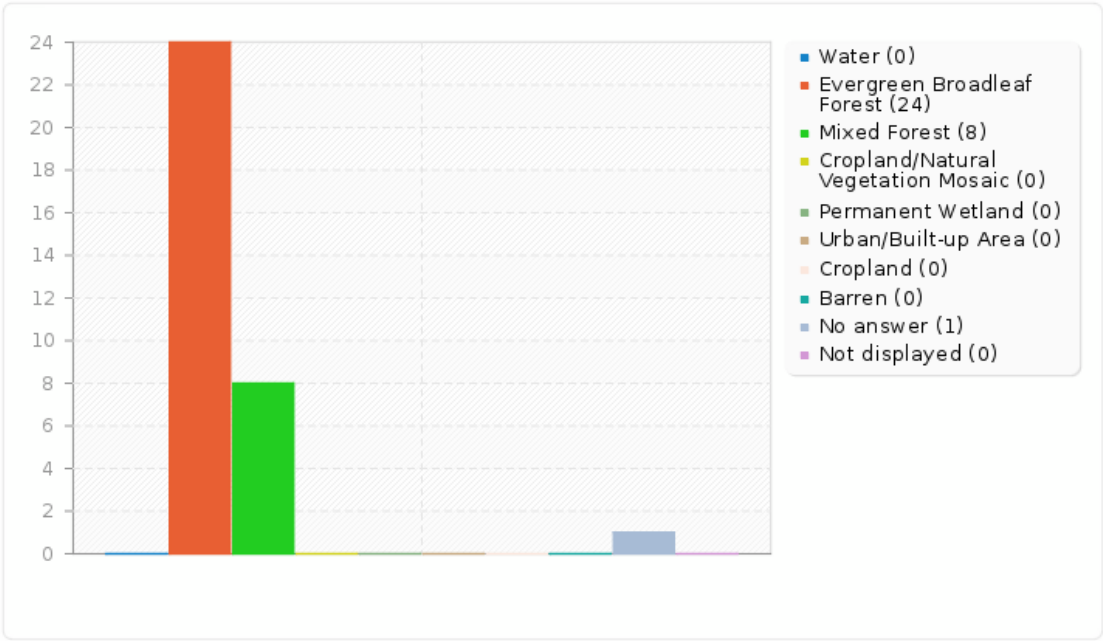



## Field summary for B24(SQ001)

[Point A]

| Answer                                  | Count | Percentage |
|-----------------------------------------|-------|------------|
| Water (A1)                              | 0     | 0.00%      |
| Evergreen Broadleaf Forest (A2)         | 2     | 6.06%      |
| Mixed Forest (A3)                       | 2     | 6.06%      |
| Cropland/Natural Vegetation Mosaic (A4) | 2     | 6.06%      |
| Permanent Wetland (A5)                  | 0     | 0.00%      |
| Urban/Built-up Area (A6)                | 25    | 75.76%     |
| Cropland (A7)                           | 0     | 0.00%      |
| Barren (A8)                             | 1     | 3.03%      |
| No answer                               | 1     | 3.03%      |
| Not displayed                           | 0     | 0.00%      |

## Field summary for B24(SQ001)

[Point A]

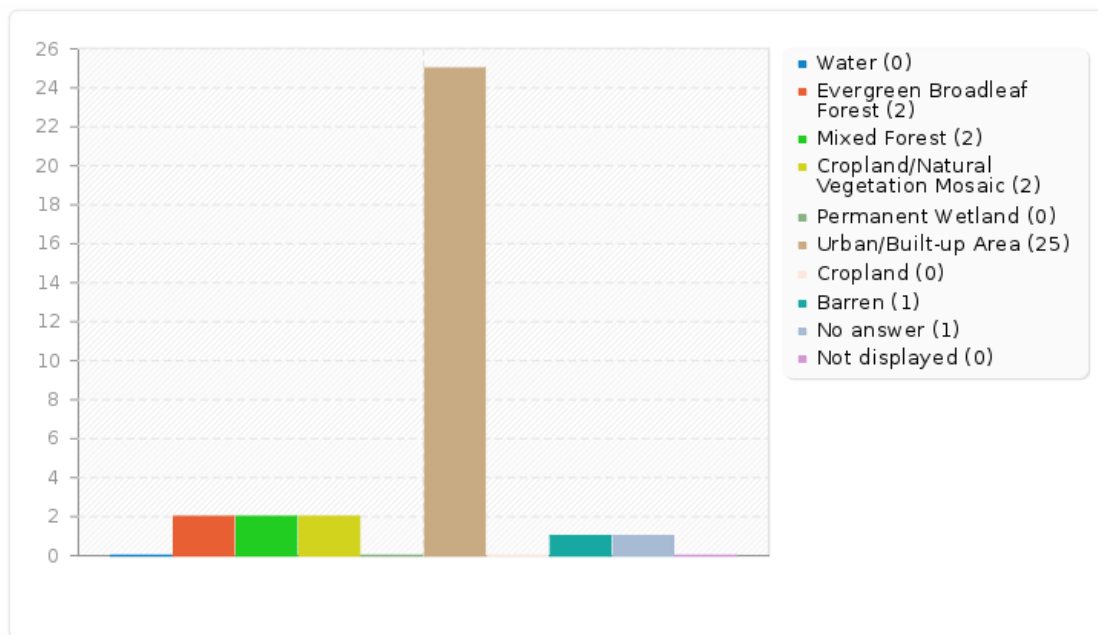

## Field summary for B24(SQ002)

[Point B]

| Answer                                  | Count | Percentage |
|-----------------------------------------|-------|------------|
| Water (A1)                              | 0     | 0.00%      |
| Evergreen Broadleaf Forest (A2)         | 0     | 0.00%      |
| Mixed Forest (A3)                       | 0     | 0.00%      |
| Cropland/Natural Vegetation Mosaic (A4) | 0     | 0.00%      |
| Permanent Wetland (A5)                  | 0     | 0.00%      |
| Urban/Built-up Area (A6)                | 31    | 93.94%     |
| Cropland (A7)                           | 0     | 0.00%      |
| Barren (A8)                             | 1     | 3.03%      |
| No answer                               | 1     | 3.03%      |
| Not displayed                           | 0     | 0.00%      |

Field summary for B24(SQ002)

[Point B]



## Field summary for B30(SQ001)

[Point A]

| Answer                                  | Count | Percentage |
|-----------------------------------------|-------|------------|
| Water (A1)                              | 0     | 0.00%      |
| Evergreen Broadleaf Forest (A2)         | 0     | 0.00%      |
| Mixed Forest (A3)                       | 0     | 0.00%      |
| Cropland/Natural Vegetation Mosaic (A4) | 0     | 0.00%      |
| Permanent Wetland (A5)                  | 0     | 0.00%      |
| Urban/Built-up Area (A6)                | 32    | 96.97%     |
| Cropland (A7)                           | 0     | 0.00%      |
| Barren (A8)                             | 0     | 0.00%      |
| No answer                               | 1     | 3.03%      |
| Not displayed                           | 0     | 0.00%      |

Field summary for B30(SQ001)

[Point A]

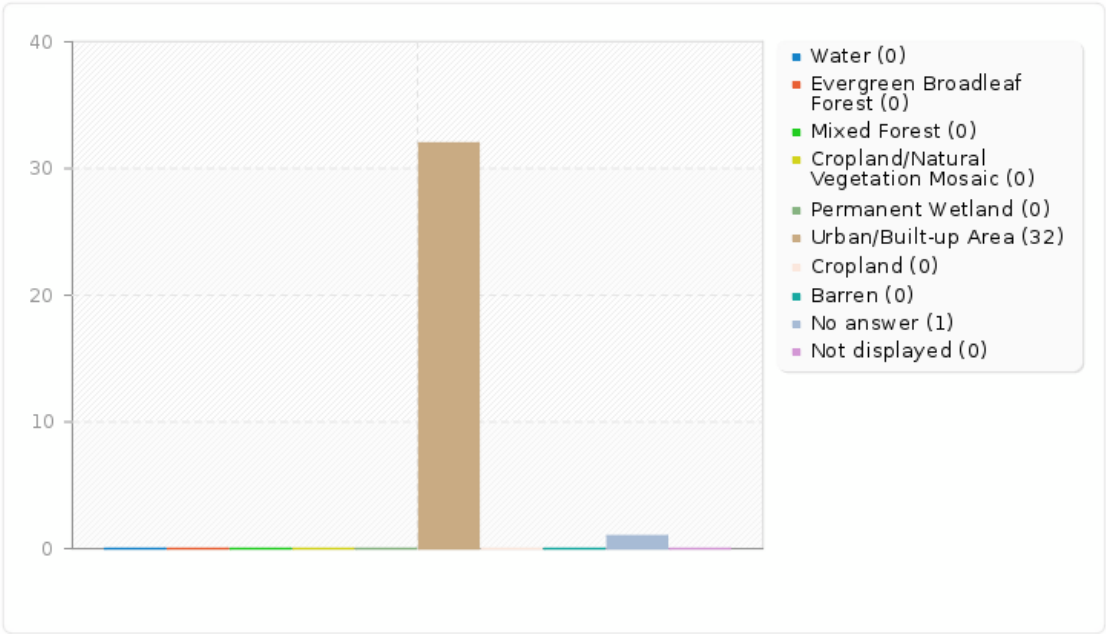

## Field summary for B30(SQ002)

[Point B]

| Answer                                  | Count | Percentage |
|-----------------------------------------|-------|------------|
| Water (A1)                              | 0     | 0.00%      |
| Evergreen Broadleaf Forest (A2)         | 0     | 0.00%      |
| Mixed Forest (A3)                       | 0     | 0.00%      |
| Cropland/Natural Vegetation Mosaic (A4) | 0     | 0.00%      |
| Permanent Wetland (A5)                  | 0     | 0.00%      |
| Urban/Built-up Area (A6)                | 32    | 96.97%     |
| Cropland (A7)                           | 0     | 0.00%      |
| Barren (A8)                             | 0     | 0.00%      |
| No answer                               | 1     | 3.03%      |
| Not displayed                           | 0     | 0.00%      |

Field summary for B30(SQ002)

[Point B]





## Field summary for B31(SQ001)

[Point A]

| Answer                                  | Count | Percentage |
|-----------------------------------------|-------|------------|
| Water (A1)                              | 0     | 0.00%      |
| Evergreen Broadleaf Forest (A2)         | 9     | 27.27%     |
| Mixed Forest (A3)                       | 10    | 30.30%     |
| Cropland/Natural Vegetation Mosaic (A4) | 12    | 36.36%     |
| Permanent Wetland (A5)                  | 0     | 0.00%      |
| Urban/Built-up Area (A6)                | 1     | 3.03%      |
| Cropland (A7)                           | 0     | 0.00%      |
| Barren (A8)                             | 0     | 0.00%      |
| No answer                               | 1     | 3.03%      |
| Not displayed                           | 0     | 0.00%      |

Field summary for B31(SQ001)

[Point A]

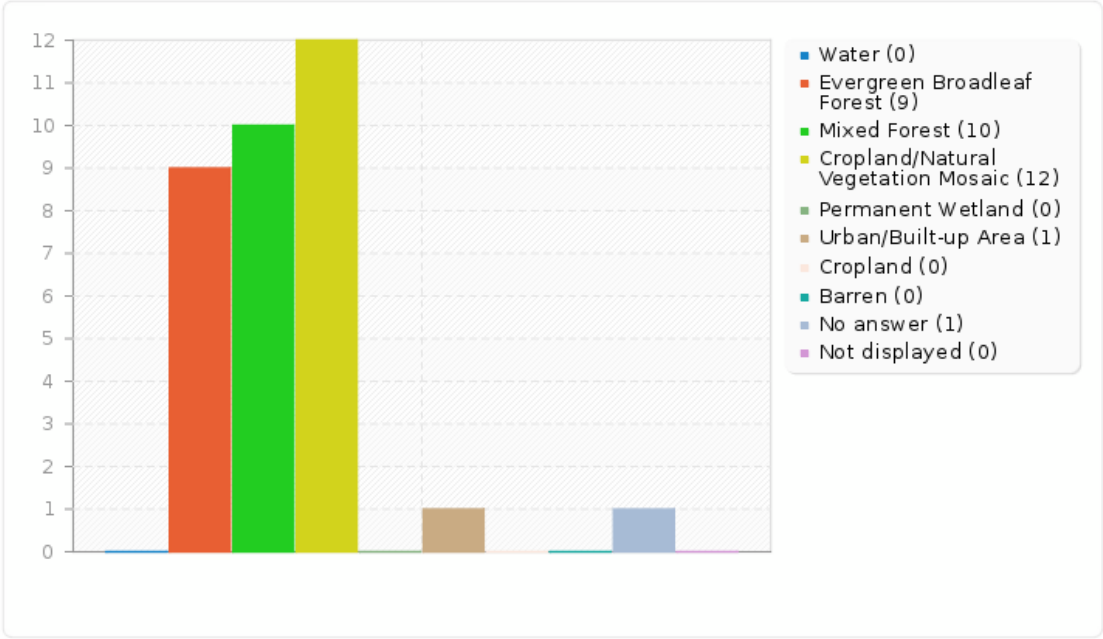

## Field summary for B31(SQ002)

[Point B]

| Answer                                  | Count | Percentage |
|-----------------------------------------|-------|------------|
| Water (A1)                              | 0     | 0.00%      |
| Evergreen Broadleaf Forest (A2)         | 0     | 0.00%      |
| Mixed Forest (A3)                       | 0     | 0.00%      |
| Cropland/Natural Vegetation Mosaic (A4) | 0     | 0.00%      |
| Permanent Wetland (A5)                  | 0     | 0.00%      |
| Urban/Built-up Area (A6)                | 32    | 96.97%     |
| Cropland (A7)                           | 0     | 0.00%      |
| Barren (A8)                             | 0     | 0.00%      |
| No answer                               | 1     | 3.03%      |
| Not displayed                           | 0     | 0.00%      |

Field summary for B31(SQ002)

[Point B]



## Field summary for B25(SQ001)

[Point A]

| Answer                                  | Count | Percentage |
|-----------------------------------------|-------|------------|
| Water (A1)                              | 0     | 0.00%      |
| Evergreen Broadleaf Forest (A2)         | 2     | 6.06%      |
| Mixed Forest (A3)                       | 1     | 3.03%      |
| Cropland/Natural Vegetation Mosaic (A4) | 4     | 12.12%     |
| Permanent Wetland (A5)                  | 0     | 0.00%      |
| Urban/Built-up Area (A6)                | 25    | 75.76%     |
| Cropland (A7)                           | 0     | 0.00%      |
| Barren (A8)                             | 0     | 0.00%      |
| No answer                               | 1     | 3.03%      |
| Not displayed                           | 0     | 0.00%      |

## Field summary for B25(SQ001)

[Point A]

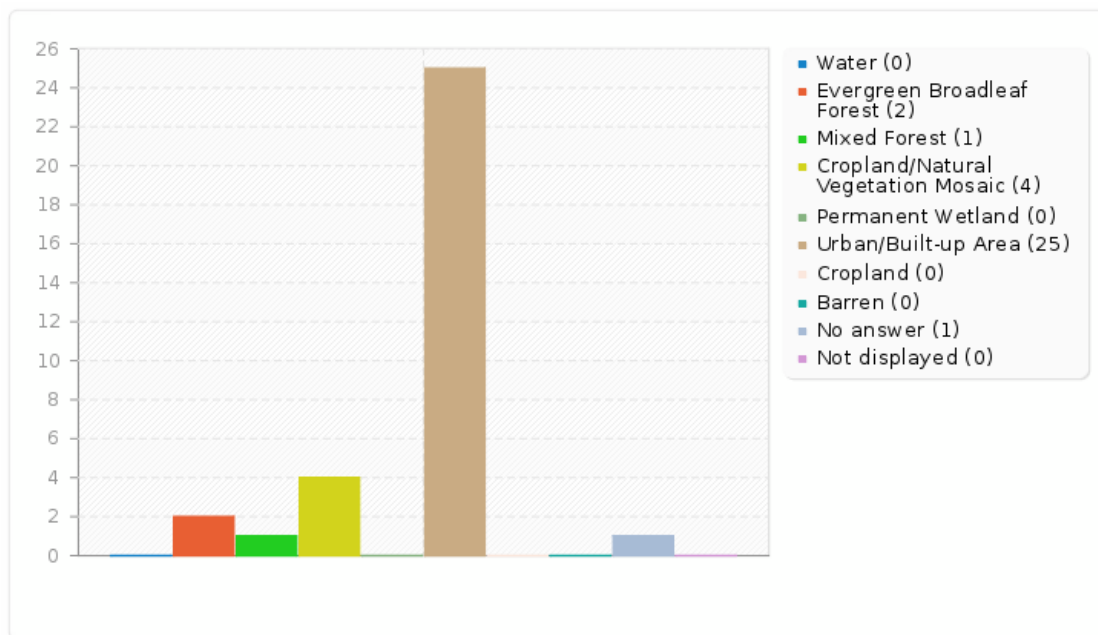

## Field summary for B25(SQ002)

[Point B]

| Answer                                  | Count | Percentage |
|-----------------------------------------|-------|------------|
| Water (A1)                              | 0     | 0.00%      |
| Evergreen Broadleaf Forest (A2)         | 0     | 0.00%      |
| Mixed Forest (A3)                       | 0     | 0.00%      |
| Cropland/Natural Vegetation Mosaic (A4) | 0     | 0.00%      |
| Permanent Wetland (A5)                  | 0     | 0.00%      |
| Urban/Built-up Area (A6)                | 32    | 96.97%     |
| Cropland (A7)                           | 0     | 0.00%      |
| Barren (A8)                             | 0     | 0.00%      |
| No answer                               | 1     | 3.03%      |
| Not displayed                           | 0     | 0.00%      |

Field summary for B25(SQ002)

[Point B]





## Field summary for B26(SQ001)

[Point A]

| Answer                                  | Count | Percentage |
|-----------------------------------------|-------|------------|
| Water (A1)                              | 0     | 0.00%      |
| Evergreen Broadleaf Forest (A2)         | 0     | 0.00%      |
| Mixed Forest (A3)                       | 0     | 0.00%      |
| Cropland/Natural Vegetation Mosaic (A4) | 1     | 3.03%      |
| Permanent Wetland (A5)                  | 0     | 0.00%      |
| Urban/Built-up Area (A6)                | 31    | 93.94%     |
| Cropland (A7)                           | 0     | 0.00%      |
| Barren (A8)                             | 0     | 0.00%      |
| No answer                               | 1     | 3.03%      |
| Not displayed                           | 0     | 0.00%      |

Field summary for B26(SQ001)

[Point A]

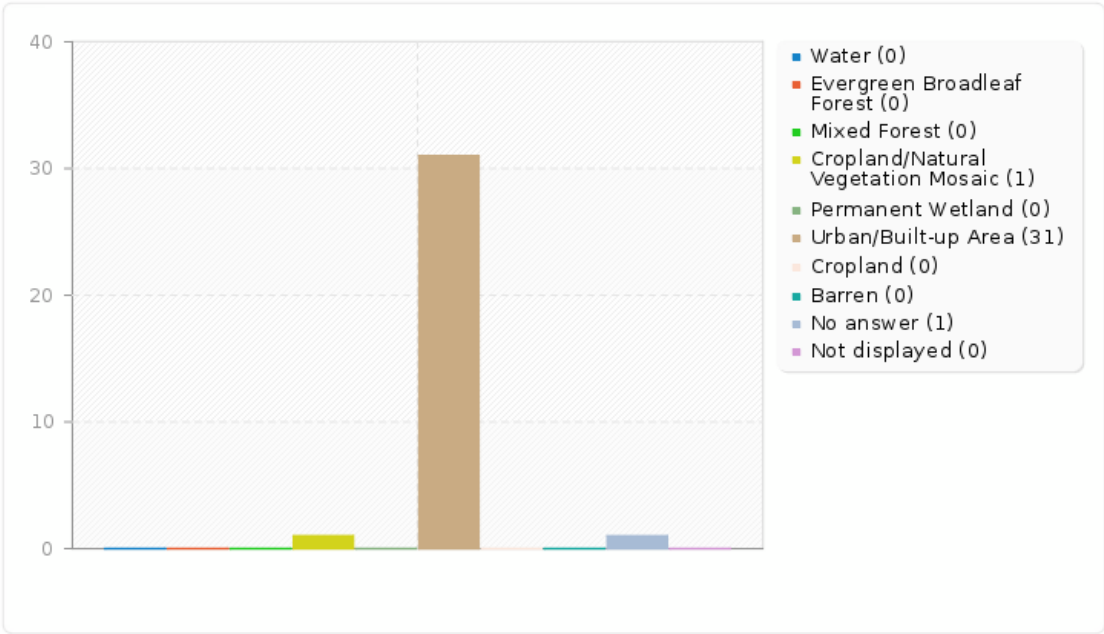

## Field summary for B26(SQ002)

[Point B]

| Answer                                  | Count | Percentage |
|-----------------------------------------|-------|------------|
| Water (A1)                              | 0     | 0.00%      |
| Evergreen Broadleaf Forest (A2)         | 4     | 12.12%     |
| Mixed Forest (A3)                       | 7     | 21.21%     |
| Cropland/Natural Vegetation Mosaic (A4) | 15    | 45.45%     |
| Permanent Wetland (A5)                  | 0     | 0.00%      |
| Urban/Built-up Area (A6)                | 6     | 18.18%     |
| Cropland (A7)                           | 0     | 0.00%      |
| Barren (A8)                             | 0     | 0.00%      |
| No answer                               | 1     | 3.03%      |
| Not displayed                           | 0     | 0.00%      |

Field summary for B26(SQ002)

[Point B]

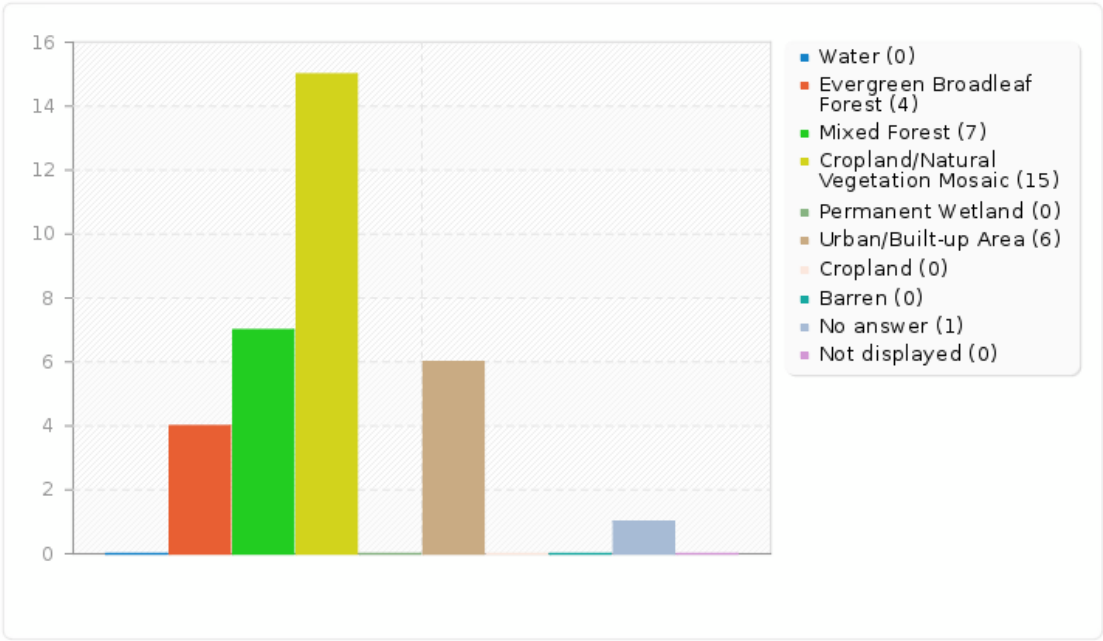

## Field summary for B27(SQ001)

[Point A]

| Answer                                  | Count | Percentage |
|-----------------------------------------|-------|------------|
| Water (A1)                              | 0     | 0.00%      |
| Evergreen Broadleaf Forest (A2)         | 0     | 0.00%      |
| Mixed Forest (A3)                       | 0     | 0.00%      |
| Cropland/Natural Vegetation Mosaic (A4) | 0     | 0.00%      |
| Permanent Wetland (A5)                  | 0     | 0.00%      |
| Urban/Built-up Area (A6)                | 31    | 93.94%     |
| Cropland (A7)                           | 1     | 3.03%      |
| Barren (A8)                             | 0     | 0.00%      |
| No answer                               | 1     | 3.03%      |
| Not displayed                           | 0     | 0.00%      |

Field summary for B27(SQ001)

[Point A]

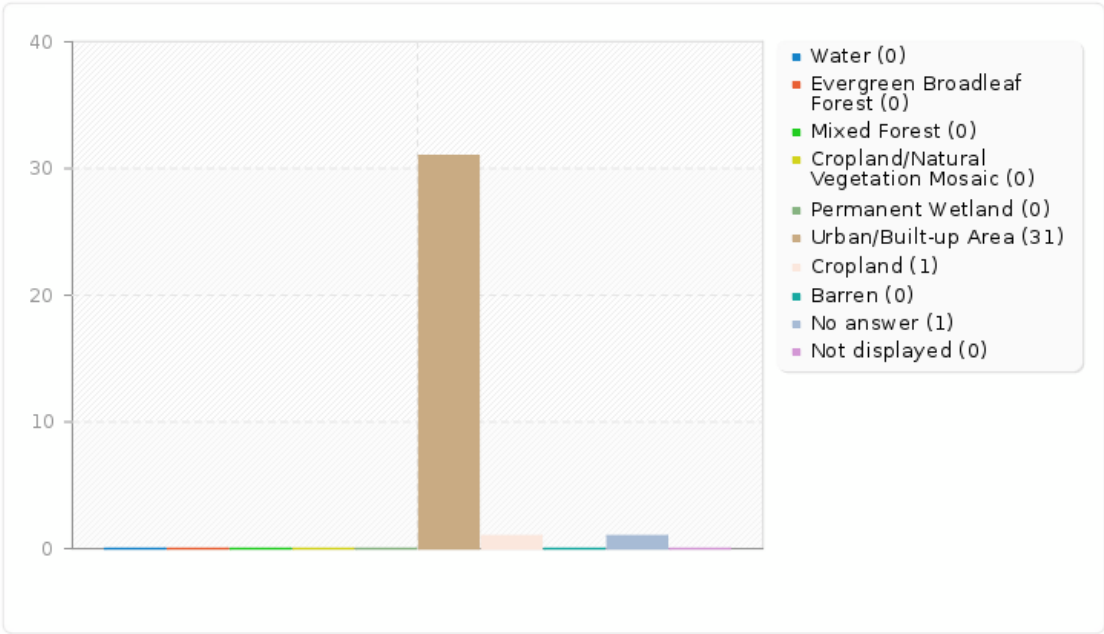

## Field summary for B27(SQ002)

[Point B]

| Answer                                  | Count | Percentage |
|-----------------------------------------|-------|------------|
| Water (A1)                              | 3     | 9.09%      |
| Evergreen Broadleaf Forest (A2)         | 0     | 0.00%      |
| Mixed Forest (A3)                       | 0     | 0.00%      |
| Cropland/Natural Vegetation Mosaic (A4) | 0     | 0.00%      |
| Permanent Wetland (A5)                  | 0     | 0.00%      |
| Urban/Built-up Area (A6)                | 3     | 9.09%      |
| Cropland (A7)                           | 0     | 0.00%      |
| Barren (A8)                             | 26    | 78.79%     |
| No answer                               | 1     | 3.03%      |
| Not displayed                           | 0     | 0.00%      |

Field summary for B27(SQ002)

[Point B]

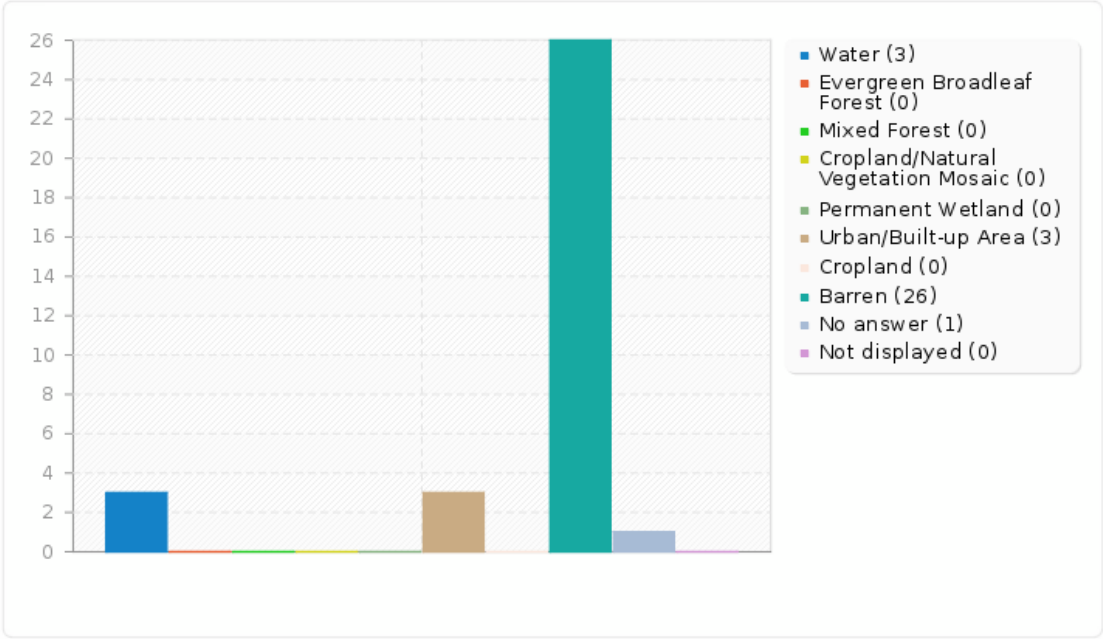



## Field summary for B28(SQ001)

[Point A]

| Answer                                  | Count | Percentage |
|-----------------------------------------|-------|------------|
| Water (A1)                              | 0     | 0.00%      |
| Evergreen Broadleaf Forest (A2)         | 0     | 0.00%      |
| Mixed Forest (A3)                       | 0     | 0.00%      |
| Cropland/Natural Vegetation Mosaic (A4) | 0     | 0.00%      |
| Permanent Wetland (A5)                  | 0     | 0.00%      |
| Urban/Built-up Area (A6)                | 32    | 96.97%     |
| Cropland (A7)                           | 0     | 0.00%      |
| Barren (A8)                             | 0     | 0.00%      |
| No answer                               | 1     | 3.03%      |
| Not displayed                           | 0     | 0.00%      |

Field summary for B28(SQ001)

[Point A]



## Field summary for B28(SQ002)

[Point B]

| Answer                                  | Count | Percentage |
|-----------------------------------------|-------|------------|
| Water (A1)                              | 0     | 0.00%      |
| Evergreen Broadleaf Forest (A2)         | 0     | 0.00%      |
| Mixed Forest (A3)                       | 0     | 0.00%      |
| Cropland/Natural Vegetation Mosaic (A4) | 0     | 0.00%      |
| Permanent Wetland (A5)                  | 1     | 3.03%      |
| Urban/Built-up Area (A6)                | 3     | 9.09%      |
| Cropland (A7)                           | 0     | 0.00%      |
| Barren (A8)                             | 28    | 84.85%     |
| No answer                               | 1     | 3.03%      |
| Not displayed                           | 0     | 0.00%      |

Field summary for B28(SQ002)

[Point B]

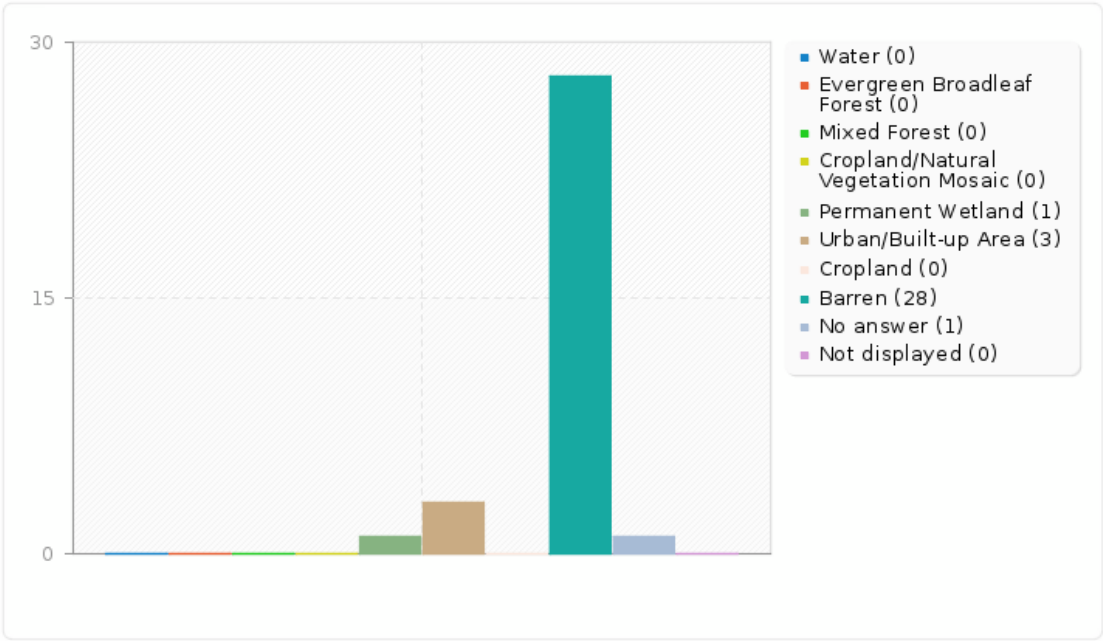

## Field summary for B29(SQ001)

[Point A]

| Answer                                  | Count | Percentage |
|-----------------------------------------|-------|------------|
| Water (A1)                              | 0     | 0.00%      |
| Evergreen Broadleaf Forest (A2)         | 1     | 3.03%      |
| Mixed Forest (A3)                       | 1     | 3.03%      |
| Cropland/Natural Vegetation Mosaic (A4) | 8     | 24.24%     |
| Permanent Wetland (A5)                  | 1     | 3.03%      |
| Urban/Built-up Area (A6)                | 5     | 15.15%     |
| Cropland (A7)                           | 3     | 9.09%      |
| Barren (A8)                             | 13    | 39.39%     |
| No answer                               | 1     | 3.03%      |
| Not displayed                           | 0     | 0.00%      |

## Field summary for B29(SQ001)

[Point A]

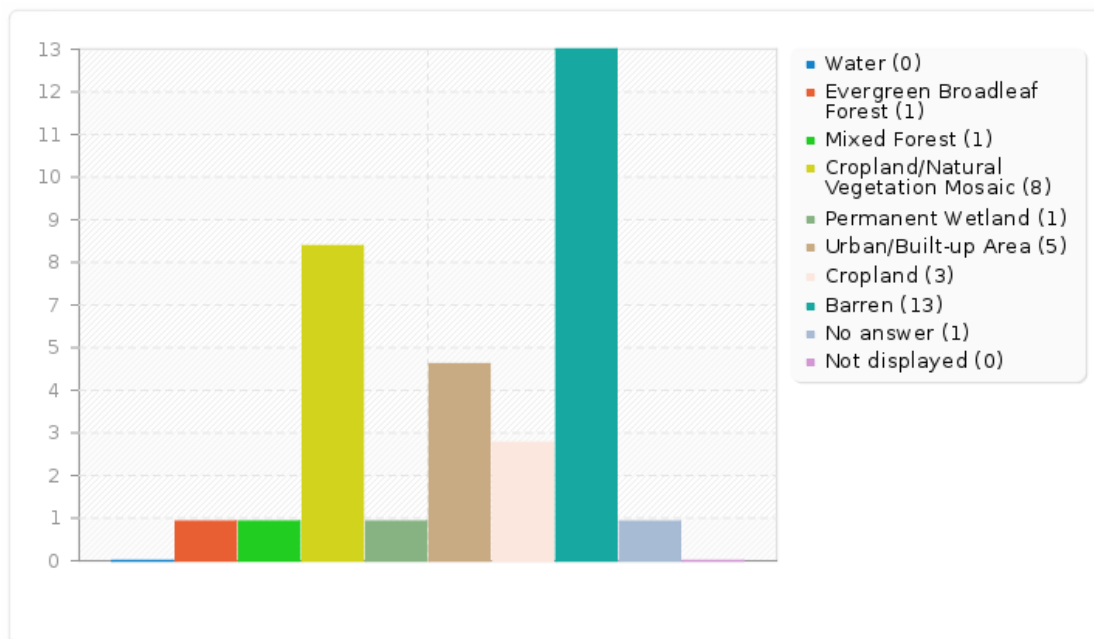

## Field summary for B29(SQ002)

[Point B]

| Answer                                  | Count | Percentage |
|-----------------------------------------|-------|------------|
| Water (A1)                              | 1     | 3.03%      |
| Evergreen Broadleaf Forest (A2)         | 0     | 0.00%      |
| Mixed Forest (A3)                       | 0     | 0.00%      |
| Cropland/Natural Vegetation Mosaic (A4) | 0     | 0.00%      |
| Permanent Wetland (A5)                  | 0     | 0.00%      |
| Urban/Built-up Area (A6)                | 8     | 24.24%     |
| Cropland (A7)                           | 0     | 0.00%      |
| Barren (A8)                             | 23    | 69.70%     |
| No answer                               | 1     | 3.03%      |
| Not displayed                           | 0     | 0.00%      |

Field summary for B29(SQ002)

[Point B]

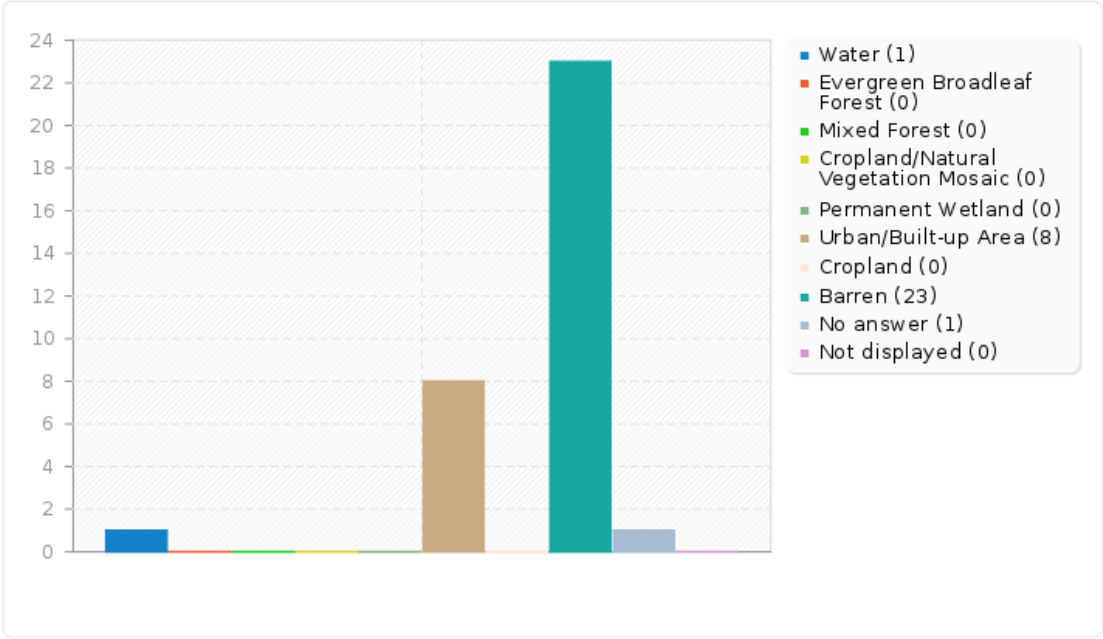



## Field summary for B32

Under what kind of scenario do you imagine using a global classified product such as the MODIS 12Q1?  
(Eg. For studying land cover classification of a country, for creating a derived dataset, policy work, etc )  
(Max. 100 words).

| Answer        | Count | Percentage |
|---------------|-------|------------|
| Answer        | 32    | 96.97%     |
| No answer     | 1     | 3.03%      |
| Not displayed | 0     | 0.00%      |

| ID  | Response                                                                                                                                                                                                                                                                                                                                                                                                              |
|-----|-----------------------------------------------------------------------------------------------------------------------------------------------------------------------------------------------------------------------------------------------------------------------------------------------------------------------------------------------------------------------------------------------------------------------|
| 5   | .                                                                                                                                                                                                                                                                                                                                                                                                                     |
| 15  | I would only use them for global or regional level land cover analysis.                                                                                                                                                                                                                                                                                                                                               |
| 21  | Investigating land cover (not land use) change over time.<br>Detecting deforestation.<br>Detecting land reclamation.<br>Spatial resolution not suitable for Singapore.                                                                                                                                                                                                                                                |
| 22  | The extraction of specific type of land cover across the globe (e.g., desert, urban, cropland)                                                                                                                                                                                                                                                                                                                        |
| 25  | Only for studying of an area sufficiently large. Definitely not for Singapore.                                                                                                                                                                                                                                                                                                                                        |
| 28  | MODIS 12Q1 has a broad spectral resolution that allows several other applications beyond just land use land cover. It is very much suited LULC at a regional scale and for temporal change analysis. Having a global coverage it presents a platform that can be correlated from one region to another and therefore suitable for LULC change analysis on a different time scales (seasonal, annual and also decadal) |
| 29  | the scenario include forest, water, built-up area etc can used MODIS 12Q1 as its resolution is 500 meters which is large area.                                                                                                                                                                                                                                                                                        |
| 31  | Actually, I have no idea.. like study a village's land use change?                                                                                                                                                                                                                                                                                                                                                    |
| 34  | For studying larger spatial extent of land use/cover mapping or change research                                                                                                                                                                                                                                                                                                                                       |
| 41  | Land cover classification. Ecological planning. Urban planning.                                                                                                                                                                                                                                                                                                                                                       |
| 44  | For studying land cover classification of a country                                                                                                                                                                                                                                                                                                                                                                   |
| 52  | Studies comparing land cover between various cities on a global scale.                                                                                                                                                                                                                                                                                                                                                |
| 57  | Carbon accounting. Measuring carbon flux from LULUCF.                                                                                                                                                                                                                                                                                                                                                                 |
| 59  | For studying land use, monitoring urban- green area ratios,                                                                                                                                                                                                                                                                                                                                                           |
| 60  | Policy work, research into land development etc                                                                                                                                                                                                                                                                                                                                                                       |
| 68  | Profiling land use types                                                                                                                                                                                                                                                                                                                                                                                              |
| 72  | To calculate percentage land use change                                                                                                                                                                                                                                                                                                                                                                               |
| 73  | policy work, research topics at a suitable scale that requires free secondary land cover data.<br>predicting local climate and weather. environmental modelling. studying deforestation.<br>education on land cover for different parts of a country. general illustration purposes.                                                                                                                                  |
| 78  | Looking at a larger geographical scale would be more useful -- possibly for policy work at the regional scale.<br>Definitely not for localized scale work as the resolution isn't too ideal.                                                                                                                                                                                                                          |
| 87  | <del>Not a response</del>                                                                                                                                                                                                                                                                                                                                                                                             |
| 96  | For studying land use change or landscape management.                                                                                                                                                                                                                                                                                                                                                                 |
| 98  | Landcover, identifying patterns/object on the water surfaces, analysis related to larger objects/area                                                                                                                                                                                                                                                                                                                 |
| 99  | ?                                                                                                                                                                                                                                                                                                                                                                                                                     |
| 100 | It is extremely useful for research in many areas - from environmental research to governmental data gathering. Land classification is useful to gather a lot of information efficiently, given that the classification is well-derived, researched, and local-specific.                                                                                                                                              |
| 104 | land use land cover changes                                                                                                                                                                                                                                                                                                                                                                                           |
| 105 | Global classified product can be used to monitor deforestation and to measure the urbanisation in the world.                                                                                                                                                                                                                                                                                                          |
| 106 | Urban policy analysis & land use land cover change                                                                                                                                                                                                                                                                                                                                                                    |
| 107 | I am not really sure. It seems too crude to be of much use other than some global/regional study.                                                                                                                                                                                                                                                                                                                     |
| 108 | Urban Planning of a country - To determine what is the plan for the future of a country For example:                                                                                                                                                                                                                                                                                                                  |

---

|     |                                                                                                                                                                                                                                                                                       |
|-----|---------------------------------------------------------------------------------------------------------------------------------------------------------------------------------------------------------------------------------------------------------------------------------------|
|     | 1. Maintain a good ratio of forest to urban area                                                                                                                                                                                                                                      |
|     | 2. To allocate land for better lifestyle, i.e. small urban areas close to forested/green areas                                                                                                                                                                                        |
| 109 | For research purpose                                                                                                                                                                                                                                                                  |
| 111 | For the future development of a country. More specifically, governments can use MODIS 12Q1 to examine how they utilize the lands in their countries and formulate future plans for permanent protecting our environment.                                                              |
| 114 | For analyzing the broad land cover classification of any part of the world. This type of a product can also help in deriving further definitions, more detailed ones, for areas around the globe that are not too accessible or too small an area for such a low resolution data set. |

## Field summary for B33

Any additional comments about the contents of the survey?

| Answer        | Count | Percentage |
|---------------|-------|------------|
| Answer        | 9     | 27.27%     |
| No answer     | 24    | 72.73%     |
| Not displayed | 0     | 0.00%      |

| ID  | Response                                                                                                                                                                                                                                                                                                                                                                                   |
|-----|--------------------------------------------------------------------------------------------------------------------------------------------------------------------------------------------------------------------------------------------------------------------------------------------------------------------------------------------------------------------------------------------|
| 21  | I am a Singaporean and work a lot with satellite imagery and hence my answers are biased as I have in depth local knowledge.<br>Some points where I am asked to identify land cover are located in a sliver of an area in between two land cover (i.e. a tree in between a road and a building). In this scenario, I assumed the classifier is working on a very high resolution imagery ( |
| 28  | The classification scheme is meant for regional scale work (e.g. MODIS 12Q1). For a highly urbanized place like Singapore, more detailed classes need to be thought of. With the absence of a tree class, there might be issues with classifying it either as a Forest ( if the cluster is of that scale) else it could be urban (if it belongs to a small countable cluster.              |
| 34  | Nil.                                                                                                                                                                                                                                                                                                                                                                                       |
| 52  | I wonder if it could be relevant to assess the accuracy of MODIS 12Q1 at the spatial scale of 500m which it is targeted at, rather than at the scale of individual points which may not be representative of each classified 500x500m scene.                                                                                                                                               |
| 57  | Land cover is typically not measured as a point, but of an area. Placing points on trees and asking for the land classification may result in confounding outcomes.                                                                                                                                                                                                                        |
| 73  | -                                                                                                                                                                                                                                                                                                                                                                                          |
| 87  | <del>XXXXXXXXXX</del>                                                                                                                                                                                                                                                                                                                                                                      |
| 100 | Good luck, Nanki! :)                                                                                                                                                                                                                                                                                                                                                                       |
| 107 | Your categories were too narrow. You needed some sort of disturbed grassland and/or something to group gardens and golf courses. Also the construction sites are problematic...                                                                                                                                                                                                            |
