# Supplementary material
Source: MDPI journal article supplement (https://www.mdpi.com/2072-4292/9/10/1075)
Supplement: s1 [file s1]

## SUPPLEMENTARY DATA

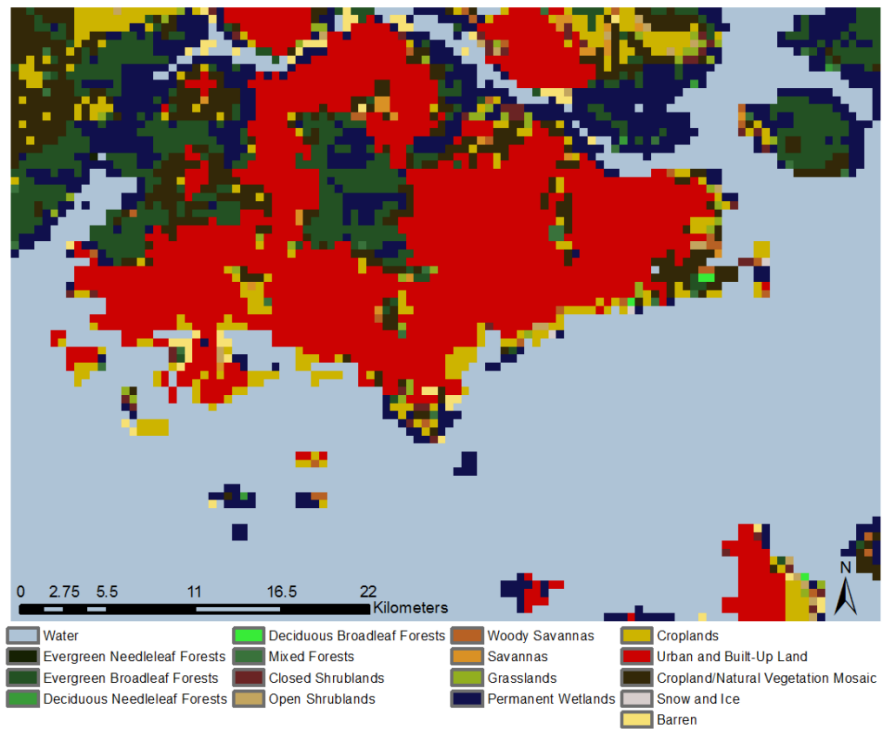

**Figure S1.** The MODIS MCD12Q1-IGBP classification for our study area, Singapore. The classification date is 31<sup>st</sup> Dec, 2008. The spatial resolution of the dataset is 500 metres.
