# Supplementary material
Source: MDPI journal article supplement (https://www.mdpi.com/2072-4292/9/10/1075)
Supplement: s1 [file s1]

## Classifying Singapore's Land Use and Land Cover

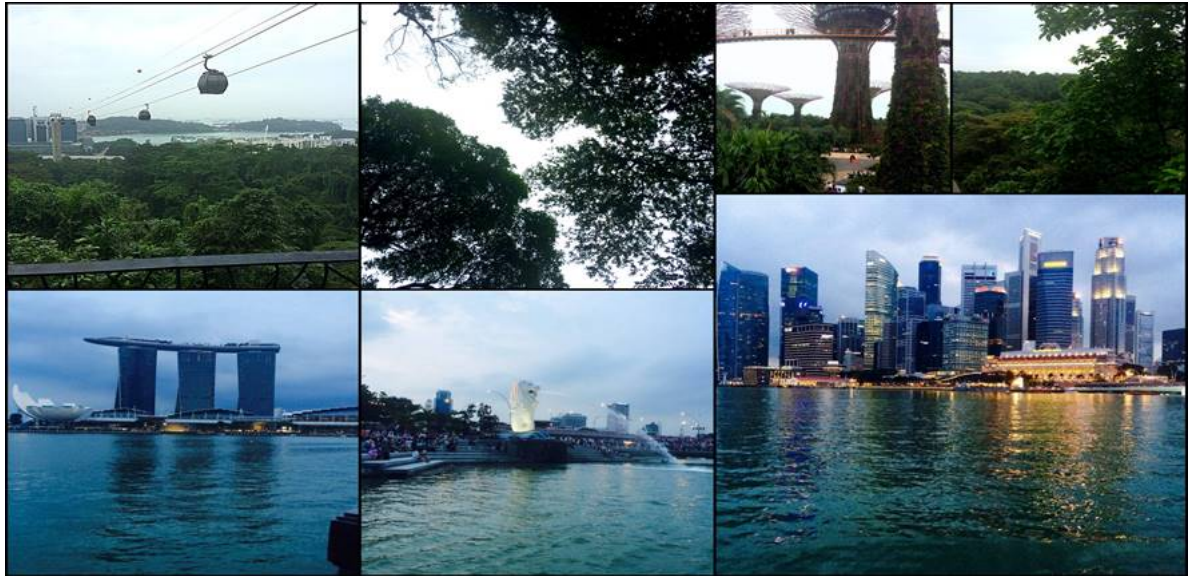

Land use and land cover change (LULC) is one of the most dynamic processes on Earth. Modifying the surface of the planet on the local, national and international levels is a major factor that contributes to ecosystem change. The presence of regional and global land cover products provide us with a wide variety of options to use for our own respective research work.

Through this questionnaire, we ask existing and potential users of satellite data to classify different sub-regions of Singapore according to the 17 land class definitions prescribed by "**International Geosphere Biosphere Programme**" (**IGBP**) (<http://www.fao.org/forestry/4031-ob6287f13b0c2adb3352c5ded18e491fd.pdf>). This enables us to understand how the different land classes relate to one another, in addition to analyzing the fitness for use of a global classified product that utilises this classification scheme, namely, the **MODIS Land Cover Type Product (MODIS 12Q1)** ([https://lpdaac.usgs.gov/dataset\\_discovery/modis/modis\\_products\\_table/mcd12q1](https://lpdaac.usgs.gov/dataset_discovery/modis/modis_products_table/mcd12q1)).

**You may access and visualize the land cover classification for Singapore as per the MODIS 12Q1 product at any point in this questionnaire here (/upload/surveys/382695/files/Sing\_MOD12Q1\_new(1).png).**

The questionnaire will take 13-15 minutes of your time and is anonymous.

More information about the survey can be found in the participant consent form **here** (/upload/surveys/382695/files/Participation Info Sheet Nanki new.pdf) (Signatures are not required, kindly indicate your consent in Question 1).

\* 1 . Do you give your consent to your responses being used in this research work ?

|     |    |
|-----|----|
| Yes | No |
|-----|----|

\* 2 . What institute/organization are you affiliated to?

\* 3 . Have you ever used remote sensing (satellite) data or it's derived-datasets?

|     |    |
|-----|----|
| Yes | No |
|-----|----|

For the following group of questions, images (source: Google Earth) of certain sub-sections of Singapore are displayed with labelled points in each of them. Kindly assign a land-class to each point as per your understanding of the image. The area of Singapore from where the image is taken is shown and highlighted with a red box in a smaller image.

The specific land class definitions can be found in the [?](#) section after each question. This can be accessed at all times during the survey.

\* 4

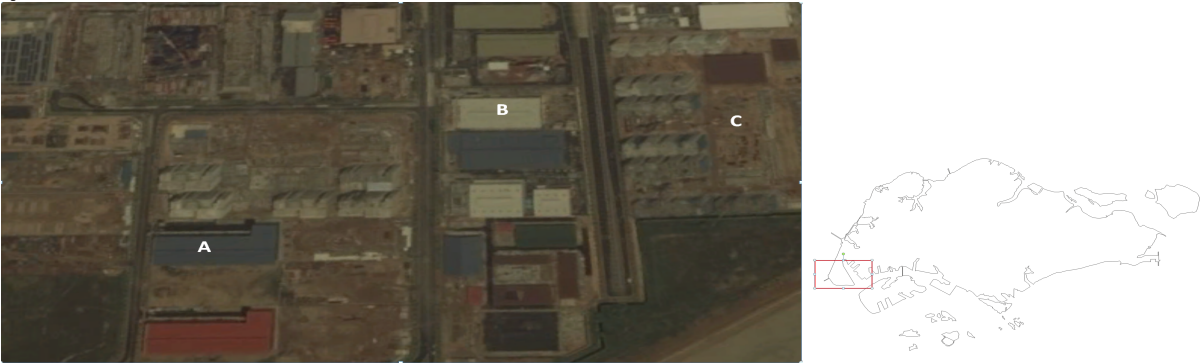

|         | Water                       | Evergreen<br>Broadleaf Forest                                     | Mixed Forest                          | Cropland/Natural<br>Vegetation Mosaic                          | Permanent<br>Wetland                       | Urban/Built-up Area                           | Cropland                       | Barre                   |
|---------|-----------------------------|-------------------------------------------------------------------|---------------------------------------|----------------------------------------------------------------|--------------------------------------------|-----------------------------------------------|--------------------------------|-------------------------|
| Point A | <input type="radio"/> Water | <input checked="" type="radio"/> Evergreen<br>Broadleaf<br>Forest | <input type="radio"/> Mixed<br>Forest | <input type="radio"/> Cropland/Natural<br>Vegetation<br>Mosaic | <input type="radio"/> Permanent<br>Wetland | <input type="radio"/> Urban/Built-<br>up Area | <input type="radio"/> Cropland | <input type="radio"/> B |
| Point B | <input type="radio"/> Water | <input checked="" type="radio"/> Evergreen<br>Broadleaf<br>Forest | <input type="radio"/> Mixed<br>Forest | <input type="radio"/> Cropland/Natural<br>Vegetation<br>Mosaic | <input type="radio"/> Permanent<br>Wetland | <input type="radio"/> Urban/Built-<br>up Area | <input type="radio"/> Cropland | <input type="radio"/> B |
| Point C | <input type="radio"/> Water | <input checked="" type="radio"/> Evergreen<br>Broadleaf<br>Forest | <input type="radio"/> Mixed<br>Forest | <input type="radio"/> Cropland/Natural<br>Vegetation<br>Mosaic | <input type="radio"/> Permanent<br>Wetland | <input type="radio"/> Urban/Built-<br>up Area | <input type="radio"/> Cropland | <input type="radio"/> B |

[?](#)  
The description for the land classes specified in the above and the following questions can be found in the form of a table [here](#) ([/upload/surveys/382695/files/Class\\_table.PNG](#)).

\* 5

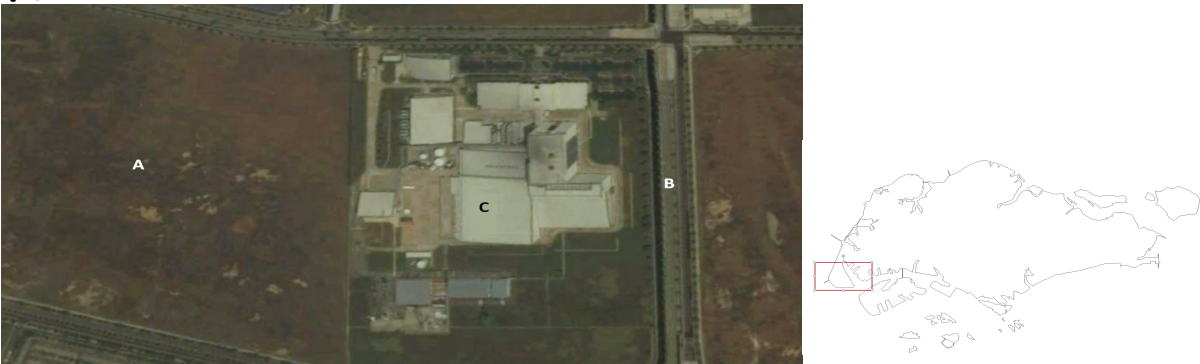

|         | Water                       | Evergreen<br>Broadleaf Forest                                     | Mixed Forest                          | Cropland/Natural<br>Vegetation Mosaic                          | Permanent<br>Wetland                       | Urban/Built-up Area                           | Cropland                       | Barre                   |
|---------|-----------------------------|-------------------------------------------------------------------|---------------------------------------|----------------------------------------------------------------|--------------------------------------------|-----------------------------------------------|--------------------------------|-------------------------|
| Point A | <input type="radio"/> Water | <input checked="" type="radio"/> Evergreen<br>Broadleaf<br>Forest | <input type="radio"/> Mixed<br>Forest | <input type="radio"/> Cropland/Natural<br>Vegetation<br>Mosaic | <input type="radio"/> Permanent<br>Wetland | <input type="radio"/> Urban/Built-<br>up Area | <input type="radio"/> Cropland | <input type="radio"/> B |



|         | Water                       | Evergreen Broadleaf Forest                                  | Mixed Forest                       | Cropland/Natural Vegetation Mosaic                                  | Permanent Wetland                                  | Urban/Built-up Area                                  | Cropland                       | Barre                   |
|---------|-----------------------------|-------------------------------------------------------------|------------------------------------|---------------------------------------------------------------------|----------------------------------------------------|------------------------------------------------------|--------------------------------|-------------------------|
| Point B | <input type="radio"/> Water | <input checked="" type="radio"/> Evergreen Broadleaf Forest | <input type="radio"/> Mixed Forest | <input checked="" type="radio"/> Cropland/Natural Vegetation Mosaic | <input checked="" type="radio"/> Permanent Wetland | <input checked="" type="radio"/> Urban/Built-up Area | <input type="radio"/> Cropland | <input type="radio"/> B |
| Point C | <input type="radio"/> Water | <input checked="" type="radio"/> Evergreen Broadleaf Forest | <input type="radio"/> Mixed Forest | <input checked="" type="radio"/> Cropland/Natural Vegetation Mosaic | <input checked="" type="radio"/> Permanent Wetland | <input checked="" type="radio"/> Urban/Built-up Area | <input type="radio"/> Cropland | <input type="radio"/> B |

The description for the land classes specified in the above and the following questions can be found in the form of a table [here](#) (/upload/surveys/382695/files/Class\_table.PNG).

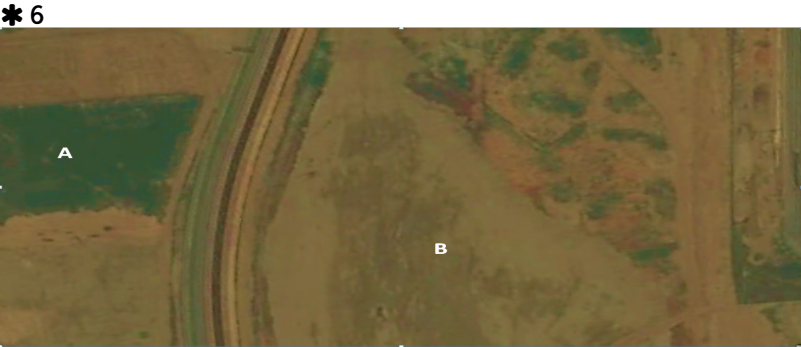

|         | Water                       | Evergreen Broadleaf Forest                                  | Mixed Forest                       | Cropland/Natural Vegetation Mosaic                                  | Permanent Wetland                                  | Urban/Built-up Area                                  | Cropland                       | Barre                   |
|---------|-----------------------------|-------------------------------------------------------------|------------------------------------|---------------------------------------------------------------------|----------------------------------------------------|------------------------------------------------------|--------------------------------|-------------------------|
| Point A | <input type="radio"/> Water | <input checked="" type="radio"/> Evergreen Broadleaf Forest | <input type="radio"/> Mixed Forest | <input checked="" type="radio"/> Cropland/Natural Vegetation Mosaic | <input checked="" type="radio"/> Permanent Wetland | <input checked="" type="radio"/> Urban/Built-up Area | <input type="radio"/> Cropland | <input type="radio"/> B |
| Point B | <input type="radio"/> Water | <input checked="" type="radio"/> Evergreen Broadleaf Forest | <input type="radio"/> Mixed Forest | <input checked="" type="radio"/> Cropland/Natural Vegetation Mosaic | <input checked="" type="radio"/> Permanent Wetland | <input checked="" type="radio"/> Urban/Built-up Area | <input type="radio"/> Cropland | <input type="radio"/> B |

The description for the land classes specified in the above and the following questions can be found in the form of a table [here](#) (/upload/surveys/382695/files/Class\_table.PNG).

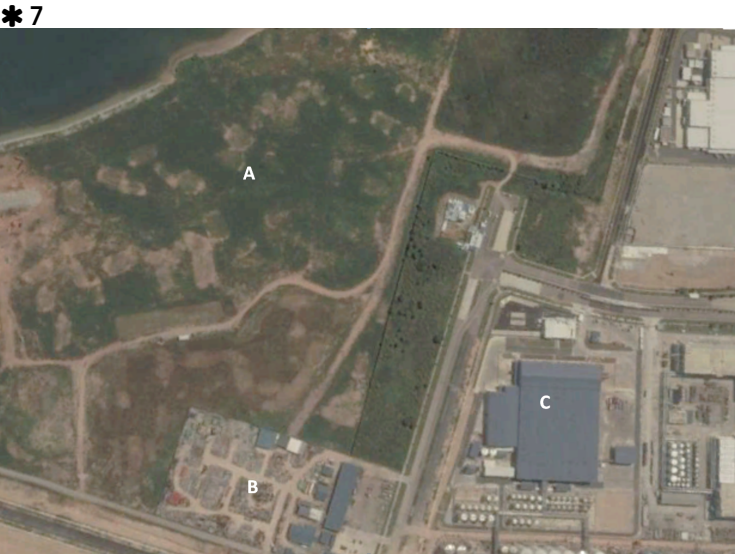

|         | Water                       | Evergreen Broadleaf Forest                                  | Mixed Forest                       | Cropland/Natural Vegetation Mosaic                                  | Permanent Wetland                                  | Urban/Built-up Area                                  | Cropland                       | Barre                   |
|---------|-----------------------------|-------------------------------------------------------------|------------------------------------|---------------------------------------------------------------------|----------------------------------------------------|------------------------------------------------------|--------------------------------|-------------------------|
| Point A | <input type="radio"/> Water | <input checked="" type="radio"/> Evergreen Broadleaf Forest | <input type="radio"/> Mixed Forest | <input checked="" type="radio"/> Cropland/Natural Vegetation Mosaic | <input checked="" type="radio"/> Permanent Wetland | <input checked="" type="radio"/> Urban/Built-up Area | <input type="radio"/> Cropland | <input type="radio"/> B |

|         | Water                       | Evergreen Broadleaf Forest                                  | Mixed Forest                       | Cropland/Natural Vegetation Mosaic                                  | Permanent Wetland                                  | Urban/Built-up Area                                  | Cropland                       | Barre                   |
|---------|-----------------------------|-------------------------------------------------------------|------------------------------------|---------------------------------------------------------------------|----------------------------------------------------|------------------------------------------------------|--------------------------------|-------------------------|
| Point B | <input type="radio"/> Water | <input checked="" type="radio"/> Evergreen Broadleaf Forest | <input type="radio"/> Mixed Forest | <input checked="" type="radio"/> Cropland/Natural Vegetation Mosaic | <input checked="" type="radio"/> Permanent Wetland | <input checked="" type="radio"/> Urban/Built-up Area | <input type="radio"/> Cropland | <input type="radio"/> B |
| Point C | <input type="radio"/> Water | <input checked="" type="radio"/> Evergreen Broadleaf Forest | <input type="radio"/> Mixed Forest | <input checked="" type="radio"/> Cropland/Natural Vegetation Mosaic | <input checked="" type="radio"/> Permanent Wetland | <input checked="" type="radio"/> Urban/Built-up Area | <input type="radio"/> Cropland | <input type="radio"/> B |

📌 The description for the land classes specified in the above and the following questions can be found in the form of a table [here](#) (/upload/surveys/382695/files/Class\_table.PNG).

\* 8

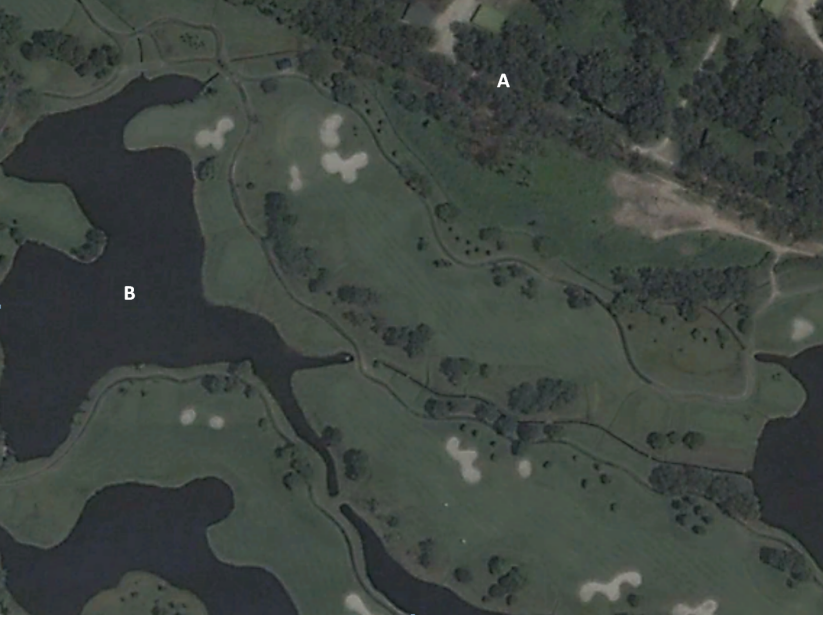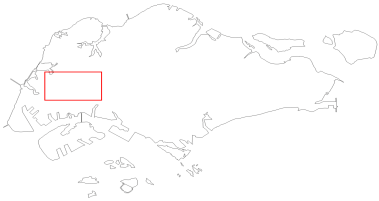

|         | Water                       | Evergreen Broadleaf Forest                                  | Mixed Forest                       | Cropland/Natural Vegetation Mosaic                                  | Permanent Wetland                                  | Urban/Built-up Area                                  | Cropland                       | Barre                   |
|---------|-----------------------------|-------------------------------------------------------------|------------------------------------|---------------------------------------------------------------------|----------------------------------------------------|------------------------------------------------------|--------------------------------|-------------------------|
| Point A | <input type="radio"/> Water | <input checked="" type="radio"/> Evergreen Broadleaf Forest | <input type="radio"/> Mixed Forest | <input checked="" type="radio"/> Cropland/Natural Vegetation Mosaic | <input checked="" type="radio"/> Permanent Wetland | <input checked="" type="radio"/> Urban/Built-up Area | <input type="radio"/> Cropland | <input type="radio"/> B |
| Point B | <input type="radio"/> Water | <input checked="" type="radio"/> Evergreen Broadleaf Forest | <input type="radio"/> Mixed Forest | <input checked="" type="radio"/> Cropland/Natural Vegetation Mosaic | <input checked="" type="radio"/> Permanent Wetland | <input checked="" type="radio"/> Urban/Built-up Area | <input type="radio"/> Cropland | <input type="radio"/> B |

📌 The description for the land classes specified in the above and the following questions can be found in the form of a table [here](#) (/upload/surveys/382695/files/Class\_table.PNG).

\* 9

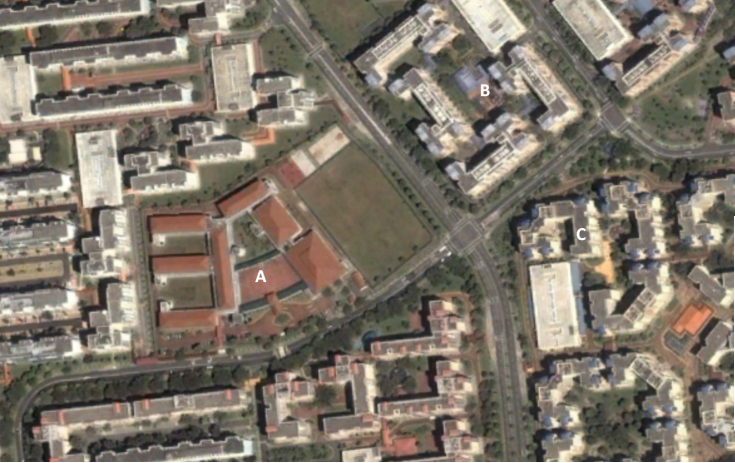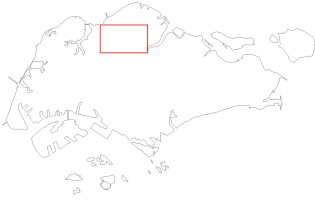

|         | Water                       | Evergreen Broadleaf Forest                                  | Mixed Forest                       | Cropland/Natural Vegetation Mosaic                                  | Permanent Wetland                                  | Urban/Built-up Area                                  | Cropland                       | Barre                   |
|---------|-----------------------------|-------------------------------------------------------------|------------------------------------|---------------------------------------------------------------------|----------------------------------------------------|------------------------------------------------------|--------------------------------|-------------------------|
| Point A | <input type="radio"/> Water | <input checked="" type="radio"/> Evergreen Broadleaf Forest | <input type="radio"/> Mixed Forest | <input checked="" type="radio"/> Cropland/Natural Vegetation Mosaic | <input checked="" type="radio"/> Permanent Wetland | <input checked="" type="radio"/> Urban/Built-up Area | <input type="radio"/> Cropland | <input type="radio"/> B |
| Point B | <input type="radio"/> Water | <input checked="" type="radio"/> Evergreen Broadleaf Forest | <input type="radio"/> Mixed Forest | <input checked="" type="radio"/> Cropland/Natural Vegetation Mosaic | <input checked="" type="radio"/> Permanent Wetland | <input checked="" type="radio"/> Urban/Built-up Area | <input type="radio"/> Cropland | <input type="radio"/> B |
| Point C | <input type="radio"/> Water | <input checked="" type="radio"/> Evergreen Broadleaf Forest | <input type="radio"/> Mixed Forest | <input checked="" type="radio"/> Cropland/Natural Vegetation Mosaic | <input checked="" type="radio"/> Permanent Wetland | <input checked="" type="radio"/> Urban/Built-up Area | <input type="radio"/> Cropland | <input type="radio"/> B |

📌 The description for the land classes specified in the above and the following questions can be found in the form of a table [here](#) (/upload/surveys/382695/files/Class\_table.PNG).

\* 10

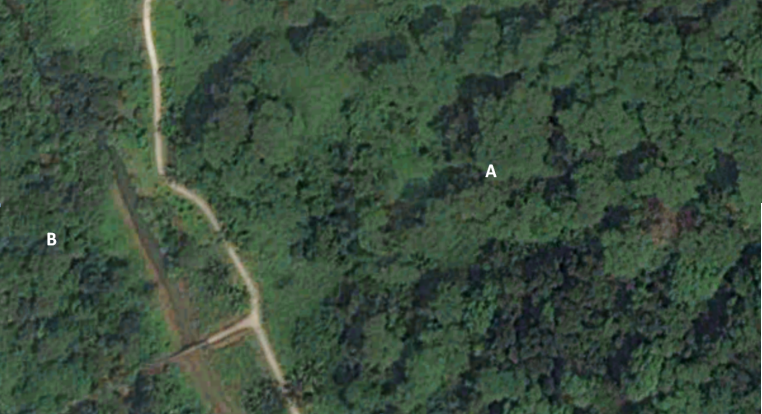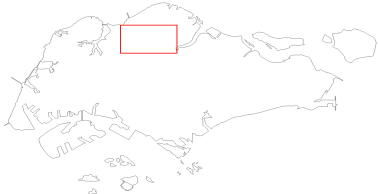

|         | Water                       | Evergreen Broadleaf Forest                                  | Mixed Forest                       | Cropland/Natural Vegetation Mosaic                                  | Permanent Wetland                                  | Urban/Built-up Area                                  | Cropland                       | Barre                   |
|---------|-----------------------------|-------------------------------------------------------------|------------------------------------|---------------------------------------------------------------------|----------------------------------------------------|------------------------------------------------------|--------------------------------|-------------------------|
| Point A | <input type="radio"/> Water | <input checked="" type="radio"/> Evergreen Broadleaf Forest | <input type="radio"/> Mixed Forest | <input checked="" type="radio"/> Cropland/Natural Vegetation Mosaic | <input checked="" type="radio"/> Permanent Wetland | <input checked="" type="radio"/> Urban/Built-up Area | <input type="radio"/> Cropland | <input type="radio"/> B |
| Point B | <input type="radio"/> Water | <input checked="" type="radio"/> Evergreen Broadleaf Forest | <input type="radio"/> Mixed Forest | <input checked="" type="radio"/> Cropland/Natural Vegetation Mosaic | <input checked="" type="radio"/> Permanent Wetland | <input checked="" type="radio"/> Urban/Built-up Area | <input type="radio"/> Cropland | <input type="radio"/> B |

📌 The description for the land classes specified in the above and the following questions can be found in the form of a table [here](#) (/upload/surveys/382695/files/Class\_table.PNG).

\* 11

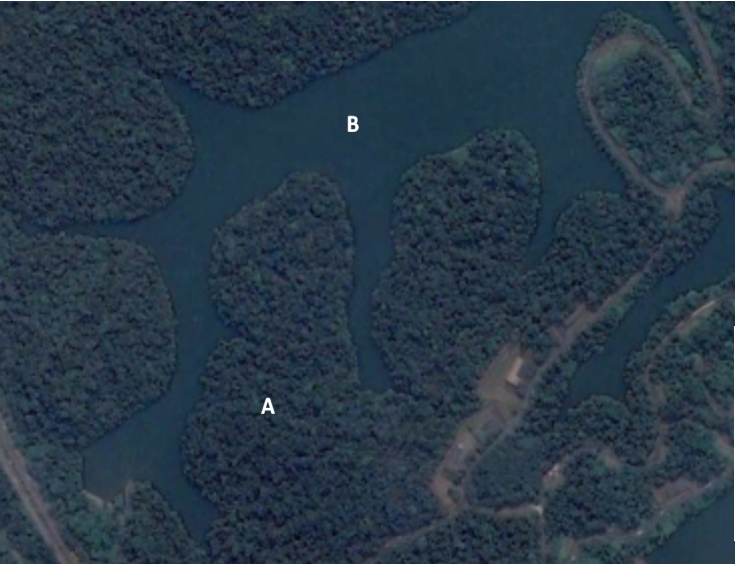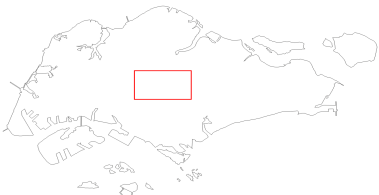



|         | Water                       | Evergreen Broadleaf Forest                                  | Mixed Forest                       | Cropland/Natural Vegetation Mosaic                                  | Permanent Wetland                                  | Urban/Built-up Area                                  | Cropland                       | Barre                   |
|---------|-----------------------------|-------------------------------------------------------------|------------------------------------|---------------------------------------------------------------------|----------------------------------------------------|------------------------------------------------------|--------------------------------|-------------------------|
| Point A | <input type="radio"/> Water | <input checked="" type="radio"/> Evergreen Broadleaf Forest | <input type="radio"/> Mixed Forest | <input checked="" type="radio"/> Cropland/Natural Vegetation Mosaic | <input checked="" type="radio"/> Permanent Wetland | <input checked="" type="radio"/> Urban/Built-up Area | <input type="radio"/> Cropland | <input type="radio"/> B |
| Point B | <input type="radio"/> Water | <input checked="" type="radio"/> Evergreen Broadleaf Forest | <input type="radio"/> Mixed Forest | <input checked="" type="radio"/> Cropland/Natural Vegetation Mosaic | <input checked="" type="radio"/> Permanent Wetland | <input checked="" type="radio"/> Urban/Built-up Area | <input type="radio"/> Cropland | <input type="radio"/> B |

📌 The description for the land classes specified in the above and the following questions can be found in the form of a table [here](#) (/upload/surveys/382695/files/Class\_table.PNG).

\* 12

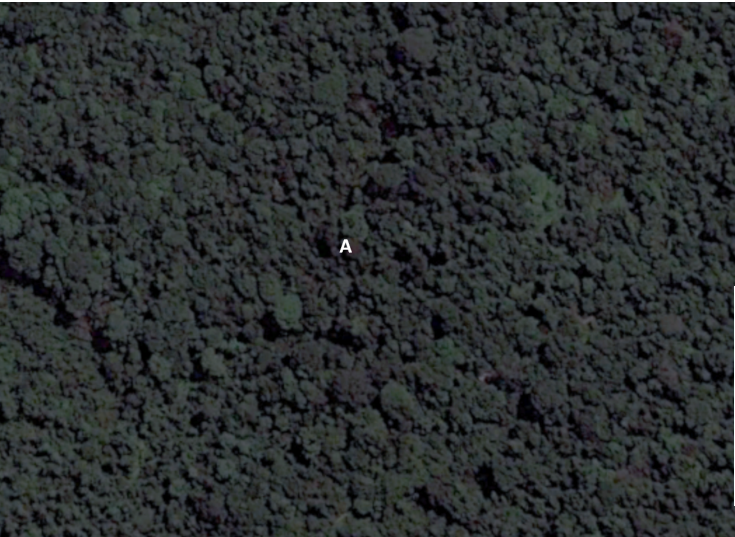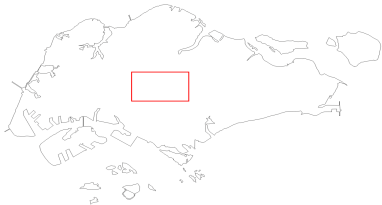

|         | Water                       | Evergreen Broadleaf Forest                                  | Mixed Forest                       | Cropland/Natural Vegetation Mosaic                                  | Permanent Wetland                                  | Urban/Built-up Area                                  | Cropland                       | Barre                   |
|---------|-----------------------------|-------------------------------------------------------------|------------------------------------|---------------------------------------------------------------------|----------------------------------------------------|------------------------------------------------------|--------------------------------|-------------------------|
| Point A | <input type="radio"/> Water | <input checked="" type="radio"/> Evergreen Broadleaf Forest | <input type="radio"/> Mixed Forest | <input checked="" type="radio"/> Cropland/Natural Vegetation Mosaic | <input checked="" type="radio"/> Permanent Wetland | <input checked="" type="radio"/> Urban/Built-up Area | <input type="radio"/> Cropland | <input type="radio"/> B |

📌 The description for the land classes specified in the above and the following questions can be found in the form of a table [here](#) (/upload/surveys/382695/files/Class\_table.PNG).

\* 13

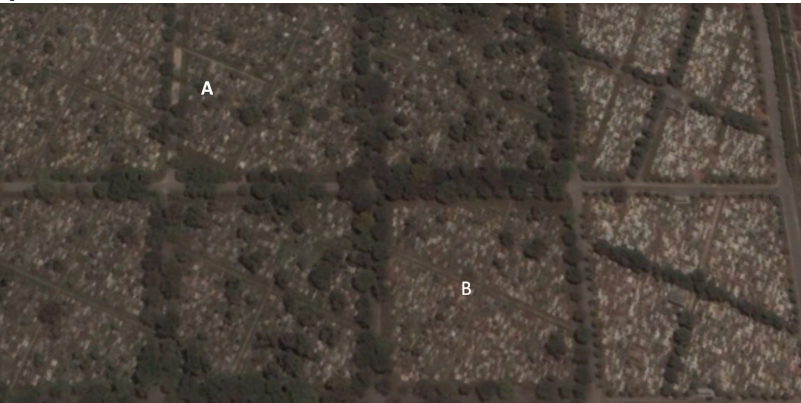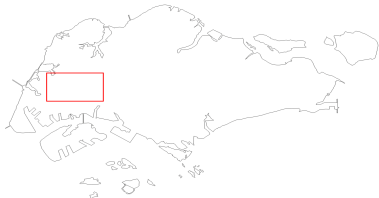

|         | Water                       | Evergreen Broadleaf Forest                                  | Mixed Forest                       | Cropland/Natural Vegetation Mosaic                                  | Permanent Wetland                                  | Urban/Built-up Area                                  | Cropland                       | Barre                   |
|---------|-----------------------------|-------------------------------------------------------------|------------------------------------|---------------------------------------------------------------------|----------------------------------------------------|------------------------------------------------------|--------------------------------|-------------------------|
| Point A | <input type="radio"/> Water | <input checked="" type="radio"/> Evergreen Broadleaf Forest | <input type="radio"/> Mixed Forest | <input checked="" type="radio"/> Cropland/Natural Vegetation Mosaic | <input checked="" type="radio"/> Permanent Wetland | <input checked="" type="radio"/> Urban/Built-up Area | <input type="radio"/> Cropland | <input type="radio"/> B |
| Point B | <input type="radio"/> Water | <input checked="" type="radio"/> Evergreen Broadleaf Forest | <input type="radio"/> Mixed Forest | <input checked="" type="radio"/> Cropland/Natural Vegetation Mosaic | <input checked="" type="radio"/> Permanent Wetland | <input checked="" type="radio"/> Urban/Built-up Area | <input type="radio"/> Cropland | <input type="radio"/> B |

📌 The description for the land classes specified in the above and the following questions can be found in the form of a table [here](#) (/upload/surveys/382695/files/Class\_table.PNG).

\* 14

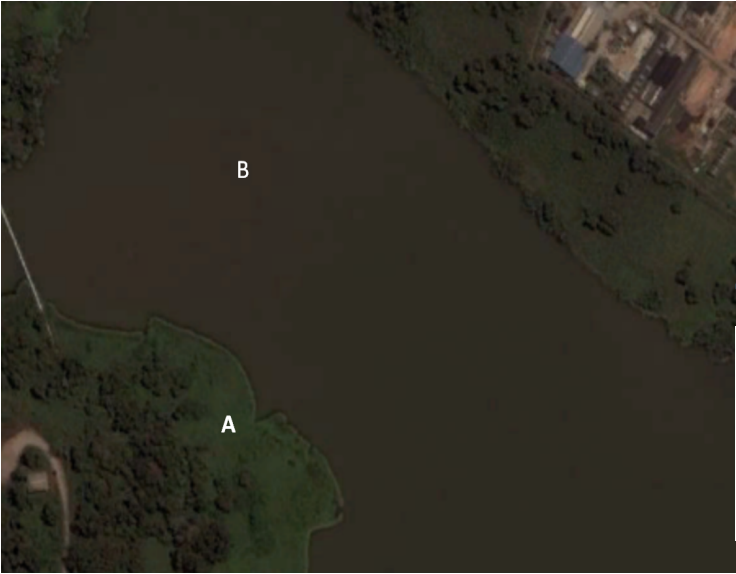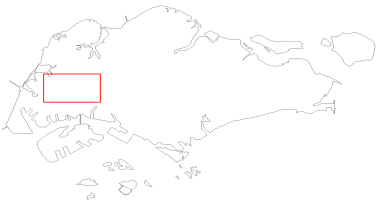

|         | Water                       | Evergreen Broadleaf Forest                                  | Mixed Forest                       | Cropland/Natural Vegetation Mosaic                       | Permanent Wetland                       | Urban/Built-up Area                       | Cropland                       | Barre                   |
|---------|-----------------------------|-------------------------------------------------------------|------------------------------------|----------------------------------------------------------|-----------------------------------------|-------------------------------------------|--------------------------------|-------------------------|
| Point A | <input type="radio"/> Water | <input checked="" type="radio"/> Evergreen Broadleaf Forest | <input type="radio"/> Mixed Forest | <input type="radio"/> Cropland/Natural Vegetation Mosaic | <input type="radio"/> Permanent Wetland | <input type="radio"/> Urban/Built-up Area | <input type="radio"/> Cropland | <input type="radio"/> B |
| Point B | <input type="radio"/> Water | <input checked="" type="radio"/> Evergreen Broadleaf Forest | <input type="radio"/> Mixed Forest | <input type="radio"/> Cropland/Natural Vegetation Mosaic | <input type="radio"/> Permanent Wetland | <input type="radio"/> Urban/Built-up Area | <input type="radio"/> Cropland | <input type="radio"/> B |

📌 The description for the land classes specified in the above and the following questions can be found in the form of a table [here](#) (/upload/surveys/382695/files/Class\_table.PNG).

\* 15

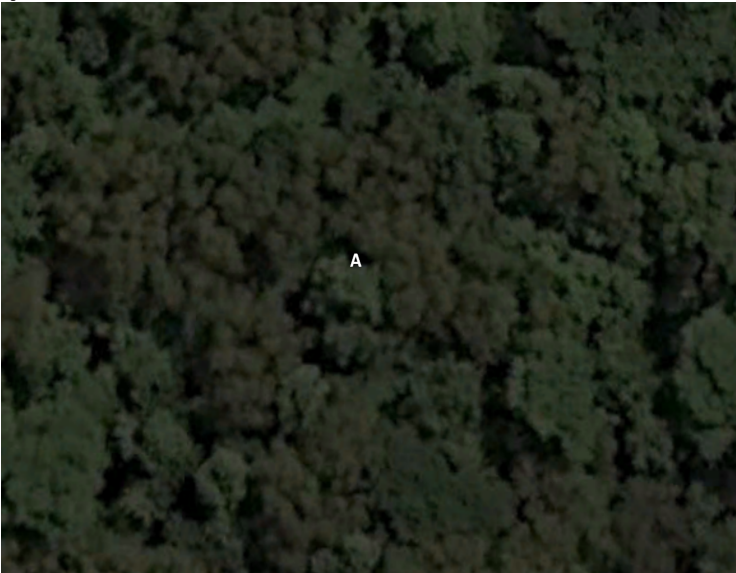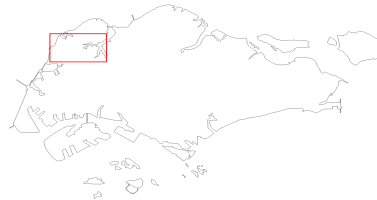

|         | Water                       | Evergreen Broadleaf Forest                                  | Mixed Forest                       | Cropland/Natural Vegetation Mosaic                       | Permanent Wetland                       | Urban/Built-up Area                       | Cropland                       | Barre                   |
|---------|-----------------------------|-------------------------------------------------------------|------------------------------------|----------------------------------------------------------|-----------------------------------------|-------------------------------------------|--------------------------------|-------------------------|
| Point A | <input type="radio"/> Water | <input checked="" type="radio"/> Evergreen Broadleaf Forest | <input type="radio"/> Mixed Forest | <input type="radio"/> Cropland/Natural Vegetation Mosaic | <input type="radio"/> Permanent Wetland | <input type="radio"/> Urban/Built-up Area | <input type="radio"/> Cropland | <input type="radio"/> B |

📌 The description for the land classes specified in the above and the following questions can be found in the form of a table [here](#) (/upload/surveys/382695/files/Class\_table.PNG).

\* 16

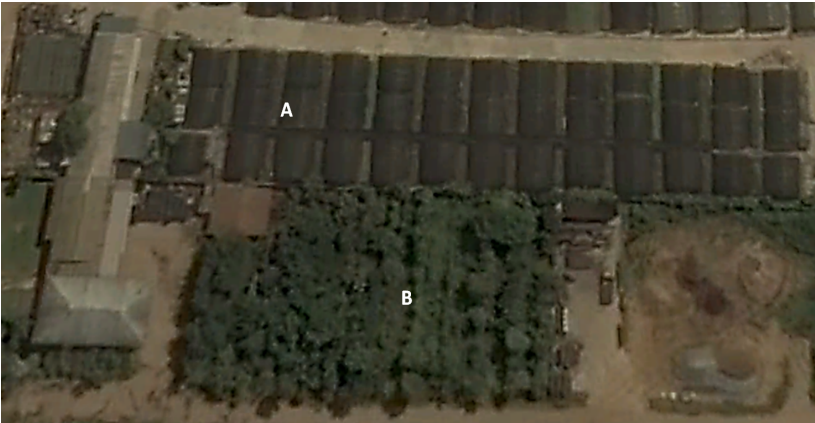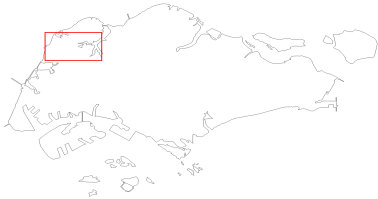

|         | Water                       | Evergreen Broadleaf Forest                                  | Mixed Forest                       | Cropland/Natural Vegetation Mosaic                                  | Permanent Wetland                                  | Urban/Built-up Area                                  | Cropland                       | Barre                   |
|---------|-----------------------------|-------------------------------------------------------------|------------------------------------|---------------------------------------------------------------------|----------------------------------------------------|------------------------------------------------------|--------------------------------|-------------------------|
| Point A | <input type="radio"/> Water | <input checked="" type="radio"/> Evergreen Broadleaf Forest | <input type="radio"/> Mixed Forest | <input checked="" type="radio"/> Cropland/Natural Vegetation Mosaic | <input checked="" type="radio"/> Permanent Wetland | <input checked="" type="radio"/> Urban/Built-up Area | <input type="radio"/> Cropland | <input type="radio"/> B |
| Point B | <input type="radio"/> Water | <input checked="" type="radio"/> Evergreen Broadleaf Forest | <input type="radio"/> Mixed Forest | <input checked="" type="radio"/> Cropland/Natural Vegetation Mosaic | <input checked="" type="radio"/> Permanent Wetland | <input checked="" type="radio"/> Urban/Built-up Area | <input type="radio"/> Cropland | <input type="radio"/> B |

📌 The description for the land classes specified in the above and the following questions can be found in the form of a table [here](#) (/upload/surveys/382695/files/Class\_table.PNG).

\* 17

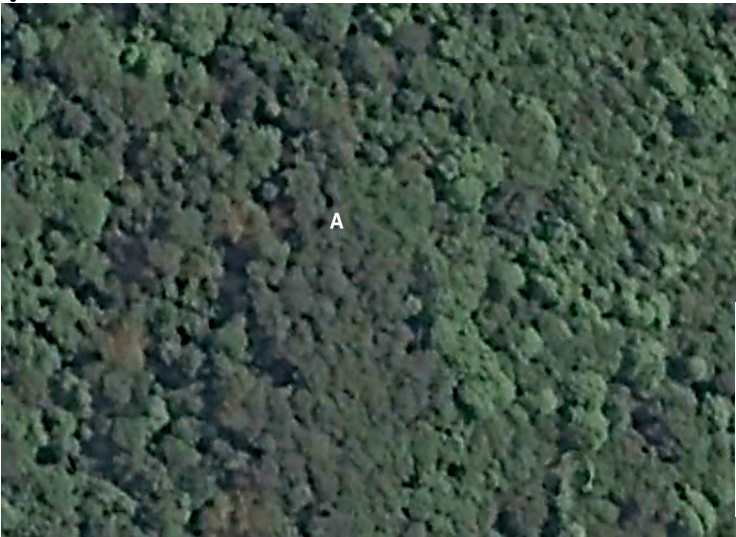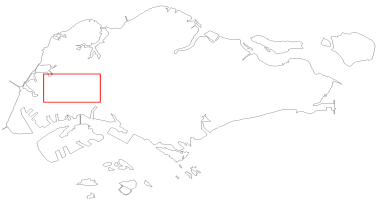

|         | Water                       | Evergreen Broadleaf Forest                                  | Mixed Forest                       | Cropland/Natural Vegetation Mosaic                                  | Permanent Wetland                                  | Urban/Built-up Area                                  | Cropland                       | Barre                   |
|---------|-----------------------------|-------------------------------------------------------------|------------------------------------|---------------------------------------------------------------------|----------------------------------------------------|------------------------------------------------------|--------------------------------|-------------------------|
| Point A | <input type="radio"/> Water | <input checked="" type="radio"/> Evergreen Broadleaf Forest | <input type="radio"/> Mixed Forest | <input checked="" type="radio"/> Cropland/Natural Vegetation Mosaic | <input checked="" type="radio"/> Permanent Wetland | <input checked="" type="radio"/> Urban/Built-up Area | <input type="radio"/> Cropland | <input type="radio"/> B |

📌 The description for the land classes specified in the above and the following questions can be found in the form of a table [here](#) (/upload/surveys/382695/files/Class\_table.PNG).

\* 18



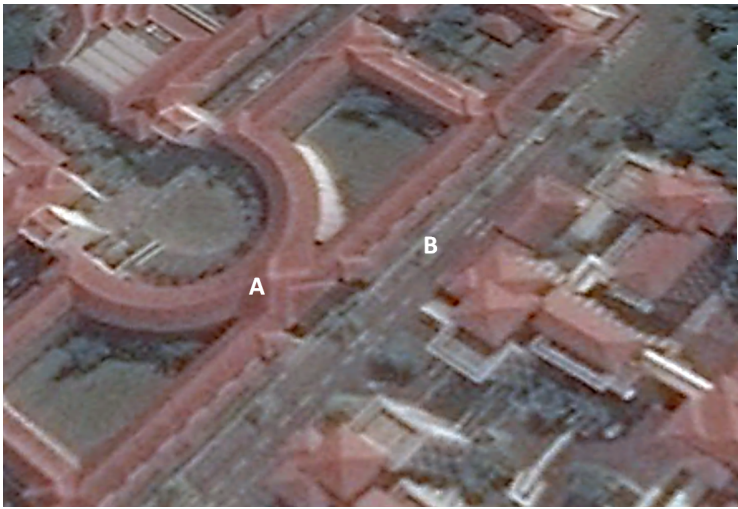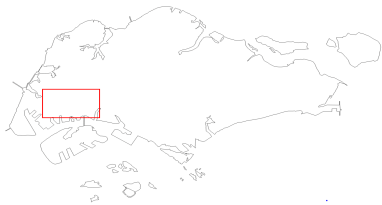

|            | Water                       | Evergreen<br>Broadleaf Forest                                     | Mixed Forest                          | Cropland/Natural<br>Vegetation Mosaic                          | Permanent<br>Wetland                       | Urban/Built-up Area                           | Cropland                       | Barre                   |
|------------|-----------------------------|-------------------------------------------------------------------|---------------------------------------|----------------------------------------------------------------|--------------------------------------------|-----------------------------------------------|--------------------------------|-------------------------|
| Point<br>A | <input type="radio"/> Water | <input checked="" type="radio"/> Evergreen<br>Broadleaf<br>Forest | <input type="radio"/> Mixed<br>Forest | <input type="radio"/> Cropland/Natural<br>Vegetation<br>Mosaic | <input type="radio"/> Permanent<br>Wetland | <input type="radio"/> Urban/Built-<br>up Area | <input type="radio"/> Cropland | <input type="radio"/> B |
| Point<br>B | <input type="radio"/> Water | <input checked="" type="radio"/> Evergreen<br>Broadleaf<br>Forest | <input type="radio"/> Mixed<br>Forest | <input type="radio"/> Cropland/Natural<br>Vegetation<br>Mosaic | <input type="radio"/> Permanent<br>Wetland | <input type="radio"/> Urban/Built-<br>up Area | <input type="radio"/> Cropland | <input type="radio"/> B |

📌 The description for the land classes specified in the above and the following questions can be found in the form of a table [here](#) (/upload/surveys/382695/files/Class\_table.PNG).

\* 19

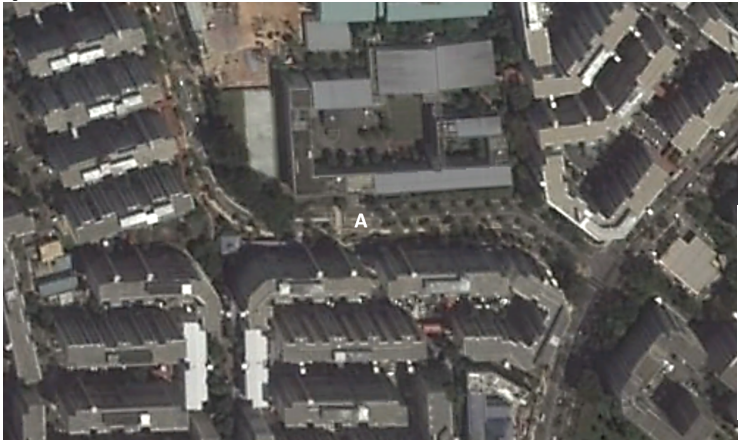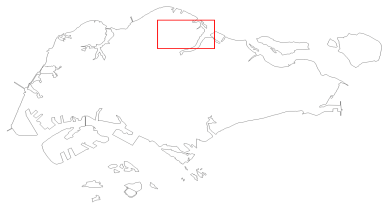

|            | Water                       | Evergreen<br>Broadleaf Forest                                     | Mixed Forest                          | Cropland/Natural<br>Vegetation Mosaic                          | Permanent<br>Wetland                       | Urban/Built-up Area                           | Cropland                       | Barre                   |
|------------|-----------------------------|-------------------------------------------------------------------|---------------------------------------|----------------------------------------------------------------|--------------------------------------------|-----------------------------------------------|--------------------------------|-------------------------|
| Point<br>A | <input type="radio"/> Water | <input checked="" type="radio"/> Evergreen<br>Broadleaf<br>Forest | <input type="radio"/> Mixed<br>Forest | <input type="radio"/> Cropland/Natural<br>Vegetation<br>Mosaic | <input type="radio"/> Permanent<br>Wetland | <input type="radio"/> Urban/Built-<br>up Area | <input type="radio"/> Cropland | <input type="radio"/> B |

📌 The description for the land classes specified in the above and the following questions can be found in the form of a table [here](#) (/upload/surveys/382695/files/Class\_table.PNG).

\* 20

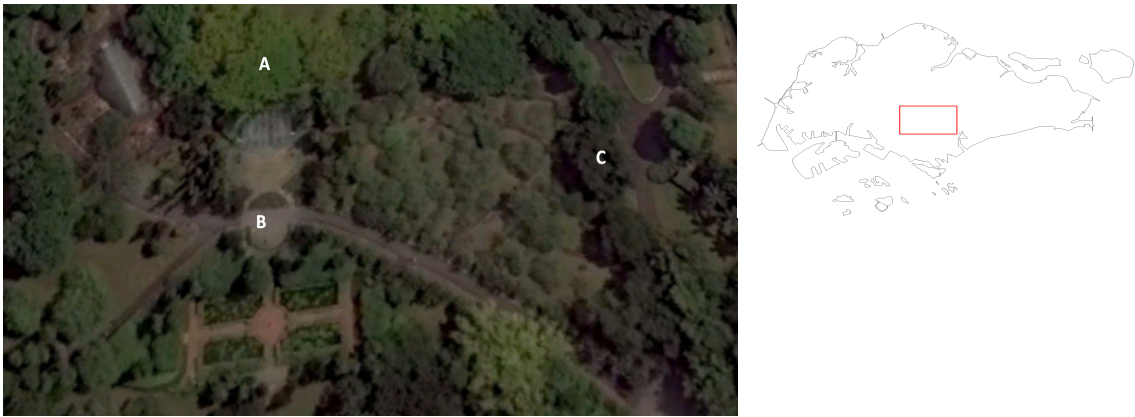

|         | Water                       | Evergreen Broadleaf Forest                                  | Mixed Forest                       | Cropland/Natural Vegetation Mosaic                       | Permanent Wetland                       | Urban/Built-up Area                       | Cropland                       | Barre                   |
|---------|-----------------------------|-------------------------------------------------------------|------------------------------------|----------------------------------------------------------|-----------------------------------------|-------------------------------------------|--------------------------------|-------------------------|
| Point A | <input type="radio"/> Water | <input checked="" type="radio"/> Evergreen Broadleaf Forest | <input type="radio"/> Mixed Forest | <input type="radio"/> Cropland/Natural Vegetation Mosaic | <input type="radio"/> Permanent Wetland | <input type="radio"/> Urban/Built-up Area | <input type="radio"/> Cropland | <input type="radio"/> B |
| Point B | <input type="radio"/> Water | <input checked="" type="radio"/> Evergreen Broadleaf Forest | <input type="radio"/> Mixed Forest | <input type="radio"/> Cropland/Natural Vegetation Mosaic | <input type="radio"/> Permanent Wetland | <input type="radio"/> Urban/Built-up Area | <input type="radio"/> Cropland | <input type="radio"/> B |
| Point C | <input type="radio"/> Water | <input checked="" type="radio"/> Evergreen Broadleaf Forest | <input type="radio"/> Mixed Forest | <input type="radio"/> Cropland/Natural Vegetation Mosaic | <input type="radio"/> Permanent Wetland | <input type="radio"/> Urban/Built-up Area | <input type="radio"/> Cropland | <input type="radio"/> B |

📌 The description for the land classes specified in the above and the following questions can be found in the form of a table [here](#) (/upload/surveys/382695/files/Class\_table.PNG).

\* 21

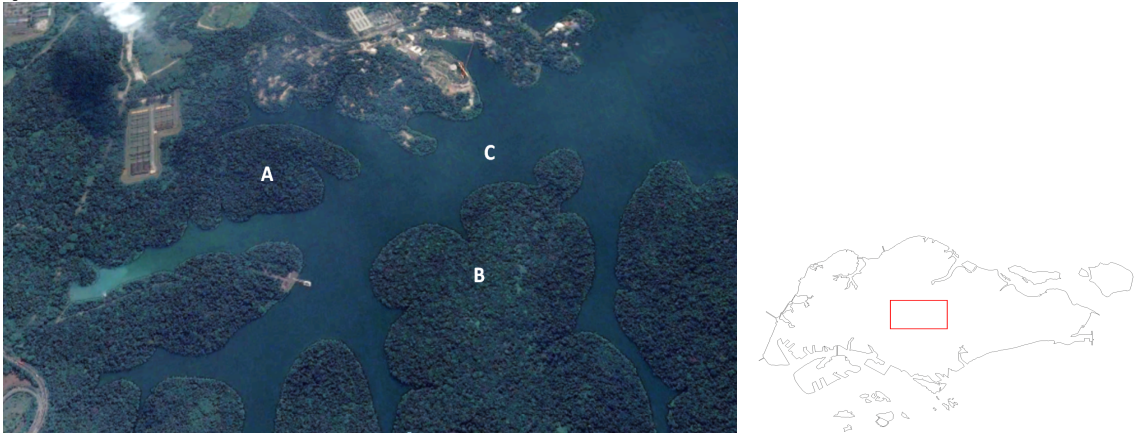

|         | Water                       | Evergreen Broadleaf Forest                                  | Mixed Forest                       | Cropland/Natural Vegetation Mosaic                       | Permanent Wetland                       | Urban/Built-up Area                       | Cropland                       | Barre                   |
|---------|-----------------------------|-------------------------------------------------------------|------------------------------------|----------------------------------------------------------|-----------------------------------------|-------------------------------------------|--------------------------------|-------------------------|
| Point A | <input type="radio"/> Water | <input checked="" type="radio"/> Evergreen Broadleaf Forest | <input type="radio"/> Mixed Forest | <input type="radio"/> Cropland/Natural Vegetation Mosaic | <input type="radio"/> Permanent Wetland | <input type="radio"/> Urban/Built-up Area | <input type="radio"/> Cropland | <input type="radio"/> B |
| Point B | <input type="radio"/> Water | <input checked="" type="radio"/> Evergreen Broadleaf Forest | <input type="radio"/> Mixed Forest | <input type="radio"/> Cropland/Natural Vegetation Mosaic | <input type="radio"/> Permanent Wetland | <input type="radio"/> Urban/Built-up Area | <input type="radio"/> Cropland | <input type="radio"/> B |
| Point C | <input type="radio"/> Water | <input checked="" type="radio"/> Evergreen Broadleaf Forest | <input type="radio"/> Mixed Forest | <input type="radio"/> Cropland/Natural Vegetation Mosaic | <input type="radio"/> Permanent Wetland | <input type="radio"/> Urban/Built-up Area | <input type="radio"/> Cropland | <input type="radio"/> B |

📌 The description for the land classes specified in the above and the following questions can be found in the form of a table [here](#) (/upload/surveys/382695/files/Class\_table.PNG).

\* 22

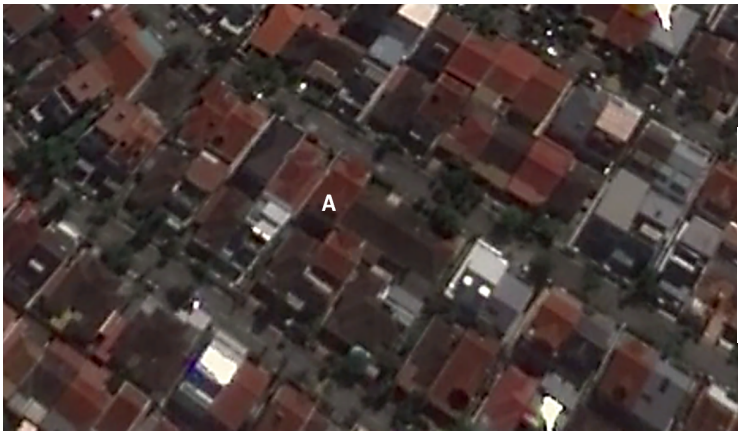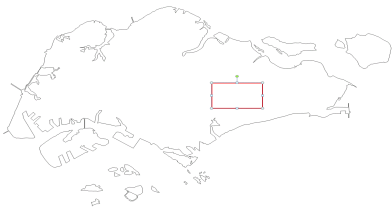

|         | Water                       | Evergreen Broadleaf Forest                                  | Mixed Forest                       | Cropland/Natural Vegetation Mosaic                       | Permanent Wetland                       | Urban/Built-up Area                       | Cropland                       | Barre                   |
|---------|-----------------------------|-------------------------------------------------------------|------------------------------------|----------------------------------------------------------|-----------------------------------------|-------------------------------------------|--------------------------------|-------------------------|
| Point A | <input type="radio"/> Water | <input checked="" type="radio"/> Evergreen Broadleaf Forest | <input type="radio"/> Mixed Forest | <input type="radio"/> Cropland/Natural Vegetation Mosaic | <input type="radio"/> Permanent Wetland | <input type="radio"/> Urban/Built-up Area | <input type="radio"/> Cropland | <input type="radio"/> B |

📌 The description for the land classes specified in the above and the following questions can be found in the form of a table [here](#) (/upload/surveys/382695/files/Class\_table.PNG).

\* 23

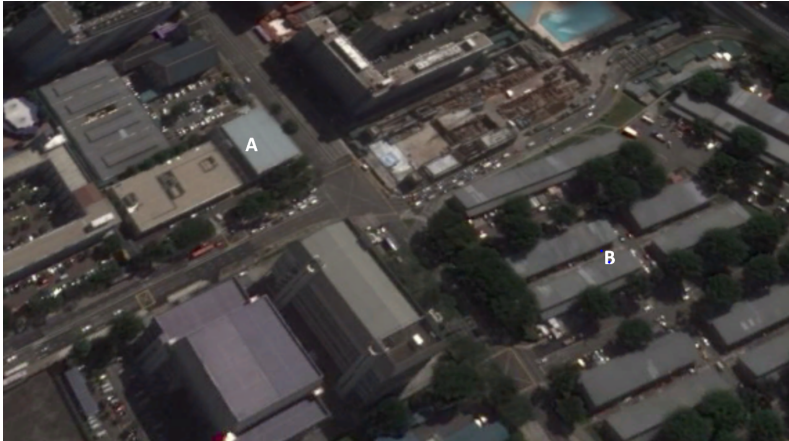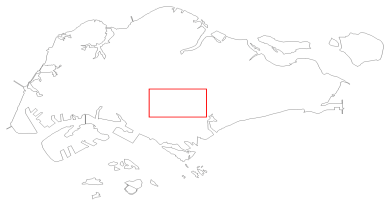

|         | Water                       | Evergreen Broadleaf Forest                                  | Mixed Forest                       | Cropland/Natural Vegetation Mosaic                       | Permanent Wetland                       | Urban/Built-up Area                       | Cropland                       | Barre                   |
|---------|-----------------------------|-------------------------------------------------------------|------------------------------------|----------------------------------------------------------|-----------------------------------------|-------------------------------------------|--------------------------------|-------------------------|
| Point A | <input type="radio"/> Water | <input checked="" type="radio"/> Evergreen Broadleaf Forest | <input type="radio"/> Mixed Forest | <input type="radio"/> Cropland/Natural Vegetation Mosaic | <input type="radio"/> Permanent Wetland | <input type="radio"/> Urban/Built-up Area | <input type="radio"/> Cropland | <input type="radio"/> B |
| Point B | <input type="radio"/> Water | <input checked="" type="radio"/> Evergreen Broadleaf Forest | <input type="radio"/> Mixed Forest | <input type="radio"/> Cropland/Natural Vegetation Mosaic | <input type="radio"/> Permanent Wetland | <input type="radio"/> Urban/Built-up Area | <input type="radio"/> Cropland | <input type="radio"/> B |

📌 The description for the land classes specified in the above and the following questions can be found in the form of a table [here](#) (/upload/surveys/382695/files/Class\_table.PNG).

\* 24



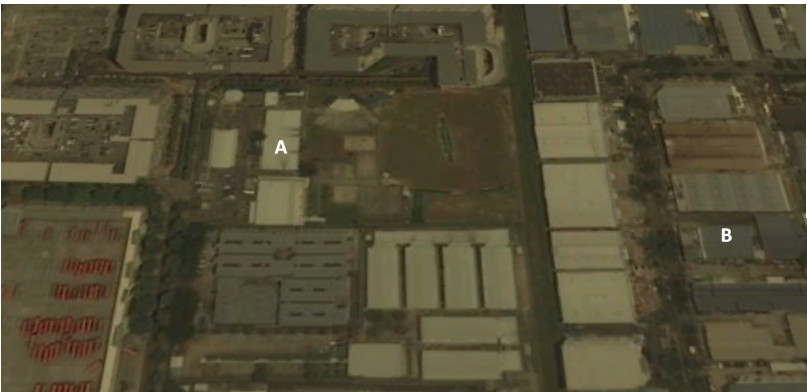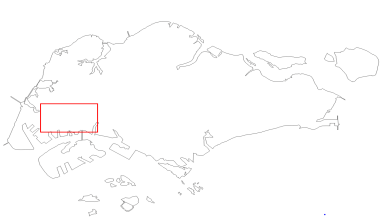

|         | Water                       | Evergreen Broadleaf Forest                                  | Mixed Forest                       | Cropland/Natural Vegetation Mosaic                       | Permanent Wetland                       | Urban/Built-up Area                       | Cropland                       | Barre                   |
|---------|-----------------------------|-------------------------------------------------------------|------------------------------------|----------------------------------------------------------|-----------------------------------------|-------------------------------------------|--------------------------------|-------------------------|
| Point A | <input type="radio"/> Water | <input checked="" type="radio"/> Evergreen Broadleaf Forest | <input type="radio"/> Mixed Forest | <input type="radio"/> Cropland/Natural Vegetation Mosaic | <input type="radio"/> Permanent Wetland | <input type="radio"/> Urban/Built-up Area | <input type="radio"/> Cropland | <input type="radio"/> B |
| Point B | <input type="radio"/> Water | <input checked="" type="radio"/> Evergreen Broadleaf Forest | <input type="radio"/> Mixed Forest | <input type="radio"/> Cropland/Natural Vegetation Mosaic | <input type="radio"/> Permanent Wetland | <input type="radio"/> Urban/Built-up Area | <input type="radio"/> Cropland | <input type="radio"/> B |

📌 The description for the land classes specified in the above and the following questions can be found in the form of a table [here](#) (/upload/surveys/382695/files/Class\_table.PNG).

\* 25

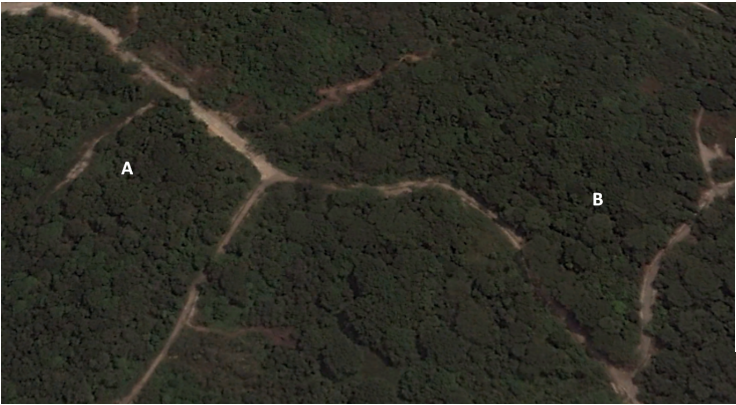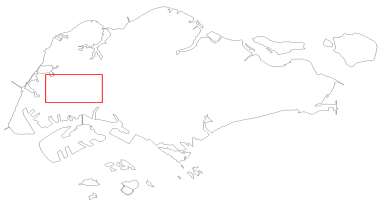

|         | Water                       | Evergreen Broadleaf Forest                                  | Mixed Forest                       | Cropland/Natural Vegetation Mosaic                       | Permanent Wetland                       | Urban/Built-up Area                       | Cropland                       | Barre                   |
|---------|-----------------------------|-------------------------------------------------------------|------------------------------------|----------------------------------------------------------|-----------------------------------------|-------------------------------------------|--------------------------------|-------------------------|
| Point A | <input type="radio"/> Water | <input checked="" type="radio"/> Evergreen Broadleaf Forest | <input type="radio"/> Mixed Forest | <input type="radio"/> Cropland/Natural Vegetation Mosaic | <input type="radio"/> Permanent Wetland | <input type="radio"/> Urban/Built-up Area | <input type="radio"/> Cropland | <input type="radio"/> B |
| Point B | <input type="radio"/> Water | <input checked="" type="radio"/> Evergreen Broadleaf Forest | <input type="radio"/> Mixed Forest | <input type="radio"/> Cropland/Natural Vegetation Mosaic | <input type="radio"/> Permanent Wetland | <input type="radio"/> Urban/Built-up Area | <input type="radio"/> Cropland | <input type="radio"/> B |

📌 The description for the land classes specified in the above and the following questions can be found in the form of a table [here](#) (/upload/surveys/382695/files/Class\_table.PNG).

\* 26

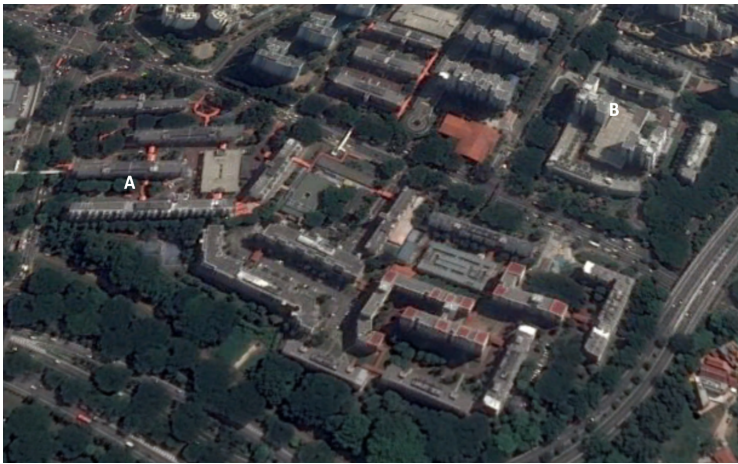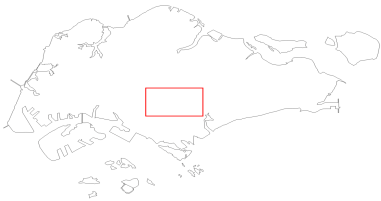

|         | Water                       | Evergreen Broadleaf Forest                                  | Mixed Forest                       | Cropland/Natural Vegetation Mosaic                                  | Permanent Wetland                                  | Urban/Built-up Area                                  | Cropland                                  | Barre                   |
|---------|-----------------------------|-------------------------------------------------------------|------------------------------------|---------------------------------------------------------------------|----------------------------------------------------|------------------------------------------------------|-------------------------------------------|-------------------------|
| Point A | <input type="radio"/> Water | <input checked="" type="radio"/> Evergreen Broadleaf Forest | <input type="radio"/> Mixed Forest | <input checked="" type="radio"/> Cropland/Natural Vegetation Mosaic | <input checked="" type="radio"/> Permanent Wetland | <input checked="" type="radio"/> Urban/Built-up Area | <input checked="" type="radio"/> Cropland | <input type="radio"/> B |
| Point B | <input type="radio"/> Water | <input checked="" type="radio"/> Evergreen Broadleaf Forest | <input type="radio"/> Mixed Forest | <input checked="" type="radio"/> Cropland/Natural Vegetation Mosaic | <input checked="" type="radio"/> Permanent Wetland | <input checked="" type="radio"/> Urban/Built-up Area | <input checked="" type="radio"/> Cropland | <input type="radio"/> B |

📌 The description for the land classes specified in the above and the following questions can be found in the form of a table [here](#) (/upload/surveys/382695/files/Class\_table.PNG).

\* 27

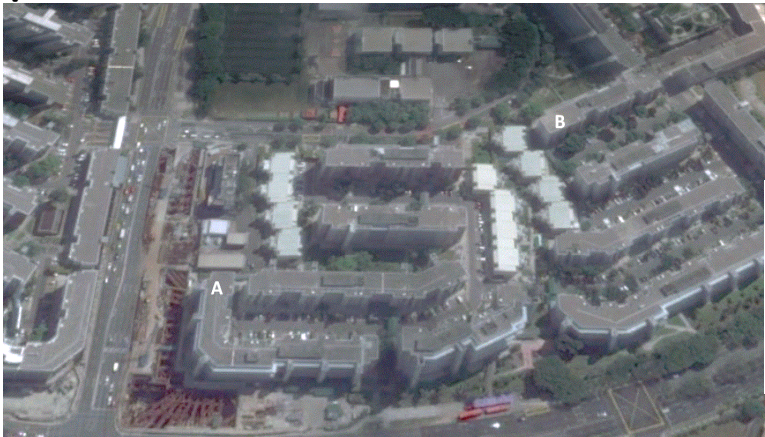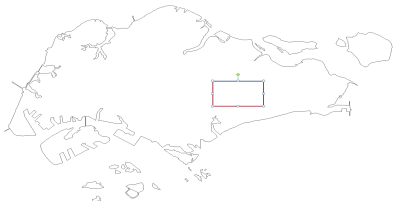

|         | Water                       | Evergreen Broadleaf Forest                                  | Mixed Forest                       | Cropland/Natural Vegetation Mosaic                                  | Permanent Wetland                                  | Urban/Built-up Area                                  | Cropland                                  | Barre                   |
|---------|-----------------------------|-------------------------------------------------------------|------------------------------------|---------------------------------------------------------------------|----------------------------------------------------|------------------------------------------------------|-------------------------------------------|-------------------------|
| Point A | <input type="radio"/> Water | <input checked="" type="radio"/> Evergreen Broadleaf Forest | <input type="radio"/> Mixed Forest | <input checked="" type="radio"/> Cropland/Natural Vegetation Mosaic | <input checked="" type="radio"/> Permanent Wetland | <input checked="" type="radio"/> Urban/Built-up Area | <input checked="" type="radio"/> Cropland | <input type="radio"/> B |
| Point B | <input type="radio"/> Water | <input checked="" type="radio"/> Evergreen Broadleaf Forest | <input type="radio"/> Mixed Forest | <input checked="" type="radio"/> Cropland/Natural Vegetation Mosaic | <input checked="" type="radio"/> Permanent Wetland | <input checked="" type="radio"/> Urban/Built-up Area | <input checked="" type="radio"/> Cropland | <input type="radio"/> B |

📌 The description for the land classes specified in the above and the following questions can be found in the form of a table [here](#) (/upload/surveys/382695/files/Class\_table.PNG).

\* 28

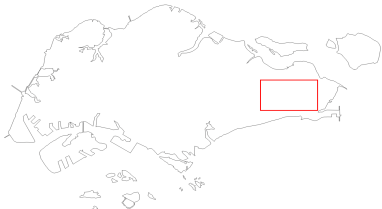

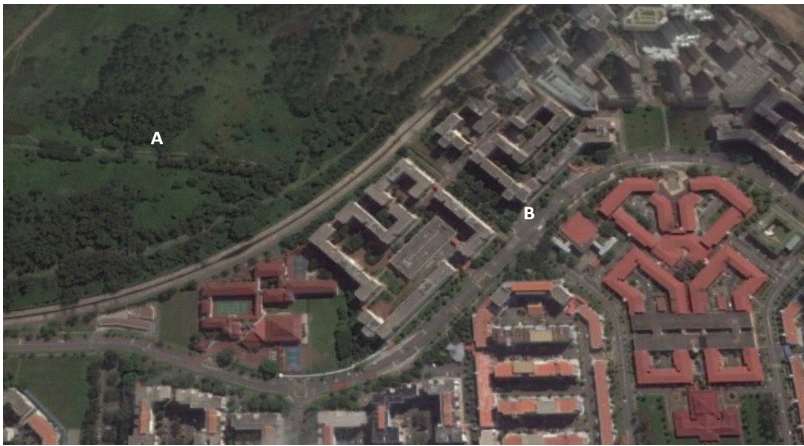

|         | Water                       | Evergreen<br>Broadleaf Forest                                     | Mixed Forest                          | Cropland/Natural<br>Vegetation Mosaic                                     | Permanent<br>Wetland                                  | Urban/Built-up Area                                      | Cropland                                  | Barre                   |
|---------|-----------------------------|-------------------------------------------------------------------|---------------------------------------|---------------------------------------------------------------------------|-------------------------------------------------------|----------------------------------------------------------|-------------------------------------------|-------------------------|
| Point A | <input type="radio"/> Water | <input checked="" type="radio"/> Evergreen<br>Broadleaf<br>Forest | <input type="radio"/> Mixed<br>Forest | <input checked="" type="radio"/> Cropland/Natural<br>Vegetation<br>Mosaic | <input checked="" type="radio"/> Permanent<br>Wetland | <input checked="" type="radio"/> Urban/Built-<br>up Area | <input checked="" type="radio"/> Cropland | <input type="radio"/> B |
| Point B | <input type="radio"/> Water | <input checked="" type="radio"/> Evergreen<br>Broadleaf<br>Forest | <input type="radio"/> Mixed<br>Forest | <input checked="" type="radio"/> Cropland/Natural<br>Vegetation<br>Mosaic | <input checked="" type="radio"/> Permanent<br>Wetland | <input checked="" type="radio"/> Urban/Built-<br>up Area | <input checked="" type="radio"/> Cropland | <input type="radio"/> B |

📌 The description for the land classes specified in the above and the following questions can be found in the form of a table [here](#) (/upload/surveys/382695/files/Class\_table.PNG).

\* 29

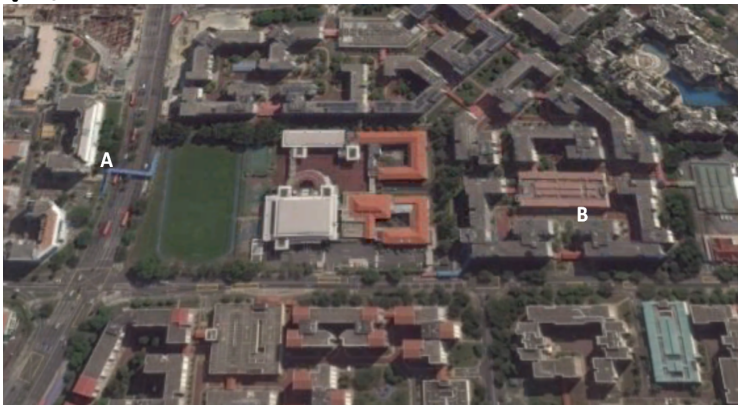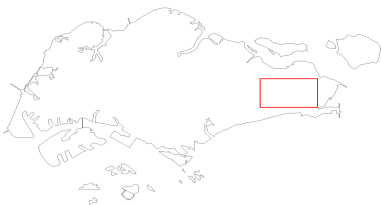

|         | Water                       | Evergreen<br>Broadleaf Forest                                     | Mixed Forest                          | Cropland/Natural<br>Vegetation Mosaic                                     | Permanent<br>Wetland                                  | Urban/Built-up Area                                      | Cropland                                  | Barre                   |
|---------|-----------------------------|-------------------------------------------------------------------|---------------------------------------|---------------------------------------------------------------------------|-------------------------------------------------------|----------------------------------------------------------|-------------------------------------------|-------------------------|
| Point A | <input type="radio"/> Water | <input checked="" type="radio"/> Evergreen<br>Broadleaf<br>Forest | <input type="radio"/> Mixed<br>Forest | <input checked="" type="radio"/> Cropland/Natural<br>Vegetation<br>Mosaic | <input checked="" type="radio"/> Permanent<br>Wetland | <input checked="" type="radio"/> Urban/Built-<br>up Area | <input checked="" type="radio"/> Cropland | <input type="radio"/> B |
| Point B | <input type="radio"/> Water | <input checked="" type="radio"/> Evergreen<br>Broadleaf<br>Forest | <input type="radio"/> Mixed<br>Forest | <input checked="" type="radio"/> Cropland/Natural<br>Vegetation<br>Mosaic | <input checked="" type="radio"/> Permanent<br>Wetland | <input checked="" type="radio"/> Urban/Built-<br>up Area | <input checked="" type="radio"/> Cropland | <input type="radio"/> B |

📌 The description for the land classes specified in the above and the following questions can be found in the form of a table [here](#) (/upload/surveys/382695/files/Class\_table.PNG).

\* 30



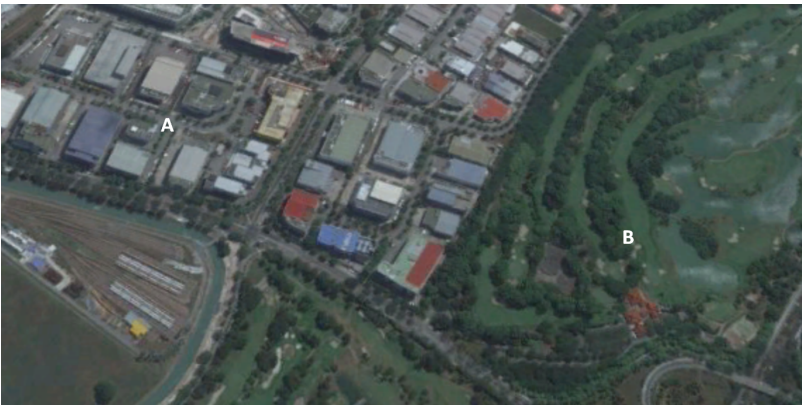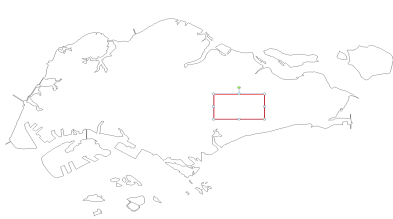

|         | Water                       | Evergreen<br>Broadleaf Forest                                     | Mixed Forest                          | Cropland/Natural<br>Vegetation Mosaic                          | Permanent<br>Wetland                                  | Urban/Built-up Area                           | Cropland                       | Barre                   |
|---------|-----------------------------|-------------------------------------------------------------------|---------------------------------------|----------------------------------------------------------------|-------------------------------------------------------|-----------------------------------------------|--------------------------------|-------------------------|
| Point A | <input type="radio"/> Water | <input checked="" type="radio"/> Evergreen<br>Broadleaf<br>Forest | <input type="radio"/> Mixed<br>Forest | <input type="radio"/> Cropland/Natural<br>Vegetation<br>Mosaic | <input checked="" type="radio"/> Permanent<br>Wetland | <input type="radio"/> Urban/Built-<br>up Area | <input type="radio"/> Cropland | <input type="radio"/> B |
| Point B | <input type="radio"/> Water | <input checked="" type="radio"/> Evergreen<br>Broadleaf<br>Forest | <input type="radio"/> Mixed<br>Forest | <input type="radio"/> Cropland/Natural<br>Vegetation<br>Mosaic | <input checked="" type="radio"/> Permanent<br>Wetland | <input type="radio"/> Urban/Built-<br>up Area | <input type="radio"/> Cropland | <input type="radio"/> B |

The description for the land classes specified in the above and the following questions can be found in the form of a table [here](#) (/upload/surveys/382695/files/Class\_table.PNG).

\* 31

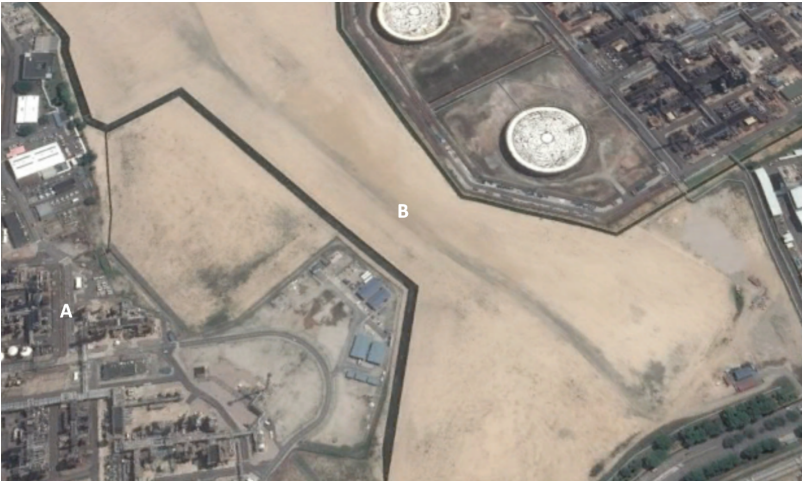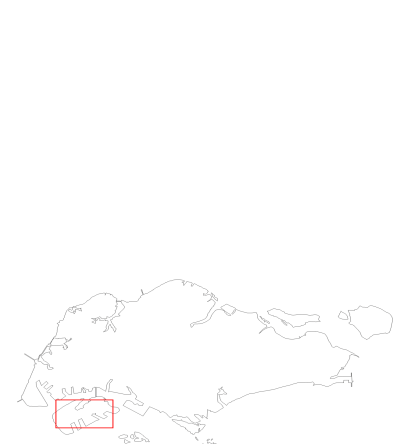

|         | Water                       | Evergreen<br>Broadleaf Forest                                     | Mixed Forest                          | Cropland/Natural<br>Vegetation Mosaic                          | Permanent<br>Wetland                                  | Urban/Built-up Area                           | Cropland                       | Barre                   |
|---------|-----------------------------|-------------------------------------------------------------------|---------------------------------------|----------------------------------------------------------------|-------------------------------------------------------|-----------------------------------------------|--------------------------------|-------------------------|
| Point A | <input type="radio"/> Water | <input checked="" type="radio"/> Evergreen<br>Broadleaf<br>Forest | <input type="radio"/> Mixed<br>Forest | <input type="radio"/> Cropland/Natural<br>Vegetation<br>Mosaic | <input checked="" type="radio"/> Permanent<br>Wetland | <input type="radio"/> Urban/Built-<br>up Area | <input type="radio"/> Cropland | <input type="radio"/> B |
| Point B | <input type="radio"/> Water | <input checked="" type="radio"/> Evergreen<br>Broadleaf<br>Forest | <input type="radio"/> Mixed<br>Forest | <input type="radio"/> Cropland/Natural<br>Vegetation<br>Mosaic | <input checked="" type="radio"/> Permanent<br>Wetland | <input type="radio"/> Urban/Built-<br>up Area | <input type="radio"/> Cropland | <input type="radio"/> B |

The description for the land classes specified in the above and the following questions can be found in the form of a table [here](#) (/upload/surveys/382695/files/Class\_table.PNG).

\* 32

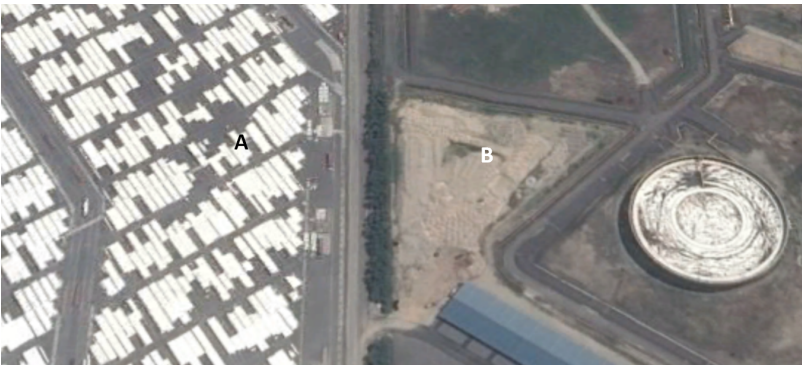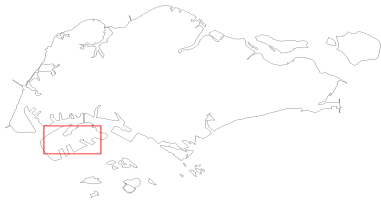

|         | Water                       | Evergreen Broadleaf Forest                                  | Mixed Forest                       | Cropland/Natural Vegetation Mosaic                                  | Permanent Wetland                                  | Urban/Built-up Area                                  | Cropland                                  | Barre                   |
|---------|-----------------------------|-------------------------------------------------------------|------------------------------------|---------------------------------------------------------------------|----------------------------------------------------|------------------------------------------------------|-------------------------------------------|-------------------------|
| Point A | <input type="radio"/> Water | <input checked="" type="radio"/> Evergreen Broadleaf Forest | <input type="radio"/> Mixed Forest | <input checked="" type="radio"/> Cropland/Natural Vegetation Mosaic | <input checked="" type="radio"/> Permanent Wetland | <input checked="" type="radio"/> Urban/Built-up Area | <input checked="" type="radio"/> Cropland | <input type="radio"/> B |
| Point B | <input type="radio"/> Water | <input checked="" type="radio"/> Evergreen Broadleaf Forest | <input type="radio"/> Mixed Forest | <input checked="" type="radio"/> Cropland/Natural Vegetation Mosaic | <input checked="" type="radio"/> Permanent Wetland | <input checked="" type="radio"/> Urban/Built-up Area | <input checked="" type="radio"/> Cropland | <input type="radio"/> B |

📌 The description for the land classes specified in the above and the following questions can be found in the form of a table [here](#) (/upload/surveys/382695/files/Class\_table.PNG).

\* 33

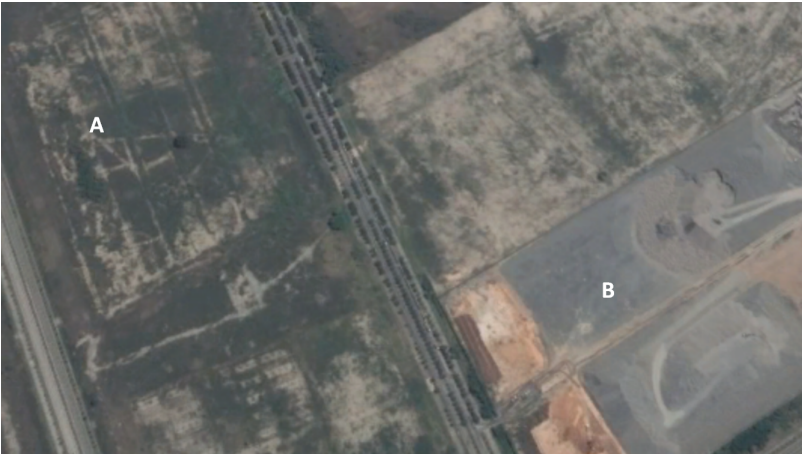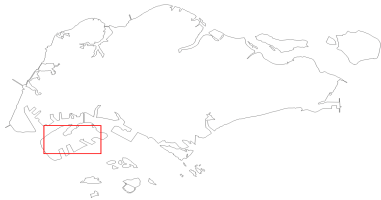

|         | Water                       | Evergreen Broadleaf Forest                                  | Mixed Forest                       | Cropland/Natural Vegetation Mosaic                                  | Permanent Wetland                                  | Urban/Built-up Area                                  | Cropland                                  | Barre                   |
|---------|-----------------------------|-------------------------------------------------------------|------------------------------------|---------------------------------------------------------------------|----------------------------------------------------|------------------------------------------------------|-------------------------------------------|-------------------------|
| Point A | <input type="radio"/> Water | <input checked="" type="radio"/> Evergreen Broadleaf Forest | <input type="radio"/> Mixed Forest | <input checked="" type="radio"/> Cropland/Natural Vegetation Mosaic | <input checked="" type="radio"/> Permanent Wetland | <input checked="" type="radio"/> Urban/Built-up Area | <input checked="" type="radio"/> Cropland | <input type="radio"/> B |
| Point B | <input type="radio"/> Water | <input checked="" type="radio"/> Evergreen Broadleaf Forest | <input type="radio"/> Mixed Forest | <input checked="" type="radio"/> Cropland/Natural Vegetation Mosaic | <input checked="" type="radio"/> Permanent Wetland | <input checked="" type="radio"/> Urban/Built-up Area | <input checked="" type="radio"/> Cropland | <input type="radio"/> B |

📌 The description for the land classes specified in the above and the following questions can be found in the form of a table [here](#) (/upload/surveys/382695/files/Class\_table.PNG).

\* 34 Under what kind of scenario do you imagine using a global classified product such as the MODIS 12Q1? (Eg. For studying land cover classification of a country, for creating a derived dataset, policy work, etc ) (Max. 100 words).
