# Supplementary material
Source: MDPI journal article supplement (https://www.mdpi.com/2072-4292/9/10/1075)
Supplement: s1 [file s1]

Archive with 3 entries (3 files):
- Survey_Results_382695_Classifying_Singapores_Land_Use_and_Land_Cover.pdf
- Classifying Singapore's Land Use and Land Cover.pdf
- MCD12Q1-1_Singapore.pdf
